# Supplementary material for: Decomposition of nitrous oxide in hydrated cobalt(i) clusters: a theoretical insight into the mechanistic roles of ligand-binding modes
Source: Royal Society of Chemistry journal article supplement (doi:10.1039/d1cp01820e), 2021-01-01
Supplement: d1cp01820e1.pdf [file d1cp01820e1.pdf]

# **Decomposition of Nitrous Oxide in Hydrated Cobalt(I) Clusters: A Theoretical Insight into Mechanistic Roles of Ligand-binding Modes**

Ephrem G. Demissie,<sup>a</sup> Wing Ka Lam,<sup>a</sup> Hayden Thompson,<sup>a,b</sup> Wai Kit Tang<sup>a,\*</sup>  
and Chi-Kit Siu<sup>a,\*</sup>

<sup>a</sup> *Department of Chemistry, City University of Hong Kong, Tat Chee Avenue, Kowloon Tong,  
Hong Kong SAR, P. R. China*

<sup>b</sup> *Department of Chemistry, University of Bath, Bath BA2 7AY, United Kingdom*

\* Corresponding authors:

Wai Kit Tang, [alfretang2@cityu.edu.hk](mailto:alfretang2@cityu.edu.hk) ; Chi-Kit Siu, [chiksiu@cityu.edu.hk](mailto:chiksiu@cityu.edu.hk)

## **Supporting Information**

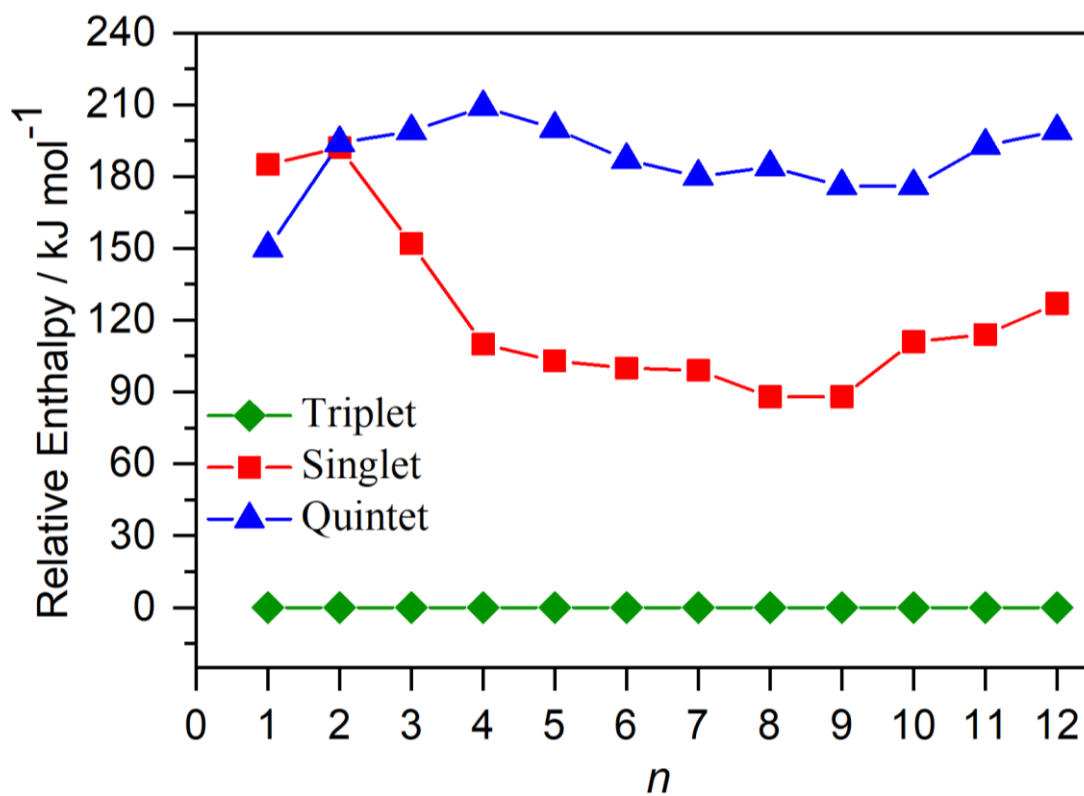

**Figure S1:** Relative enthalpies at 0 K of the lowest-energy structures of  $[\text{Co}(\text{H}_2\text{O})_n]^+$ ,  $n = 1 - 12$ , at their singlet, triplet and quintet electronic states.

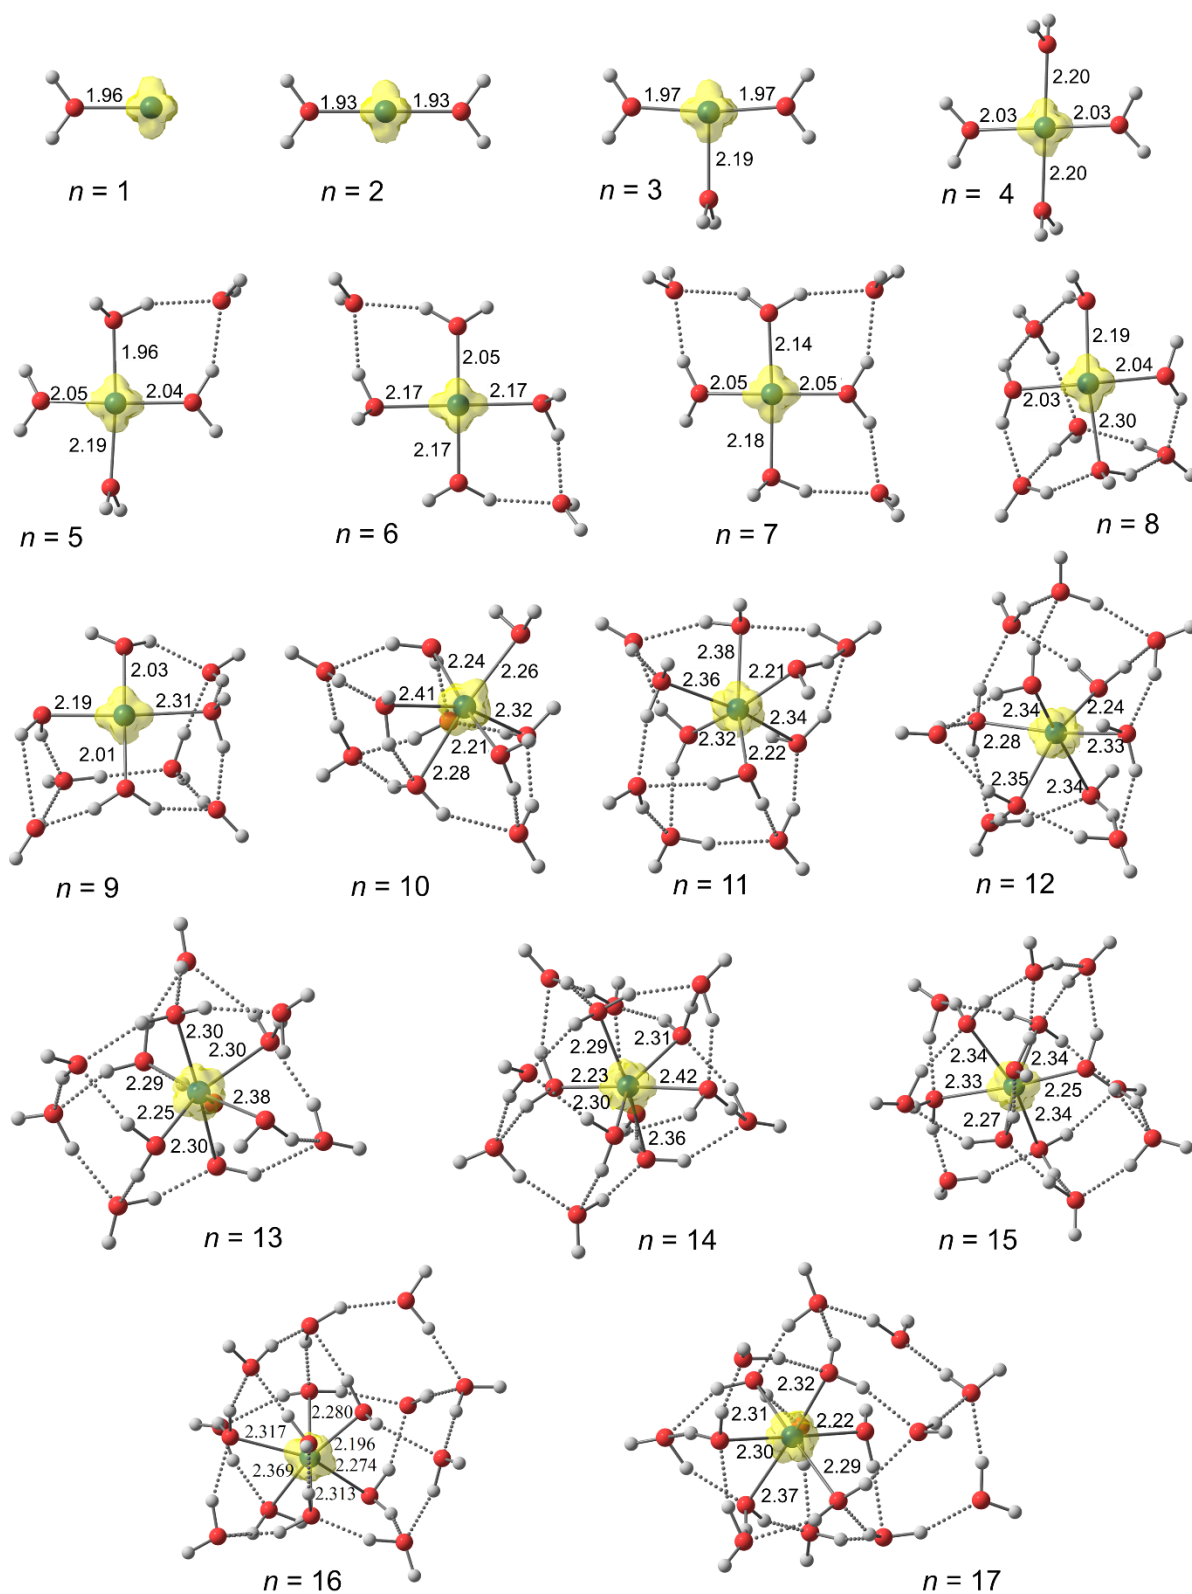

**Figure S2:** Lowest-lying geometries of  $[\text{Co}(\text{H}_2\text{O})_n]^+$ ,  $n = 1 - 17$ , at their ground triplet state. Bond lengths are displaced in Å.

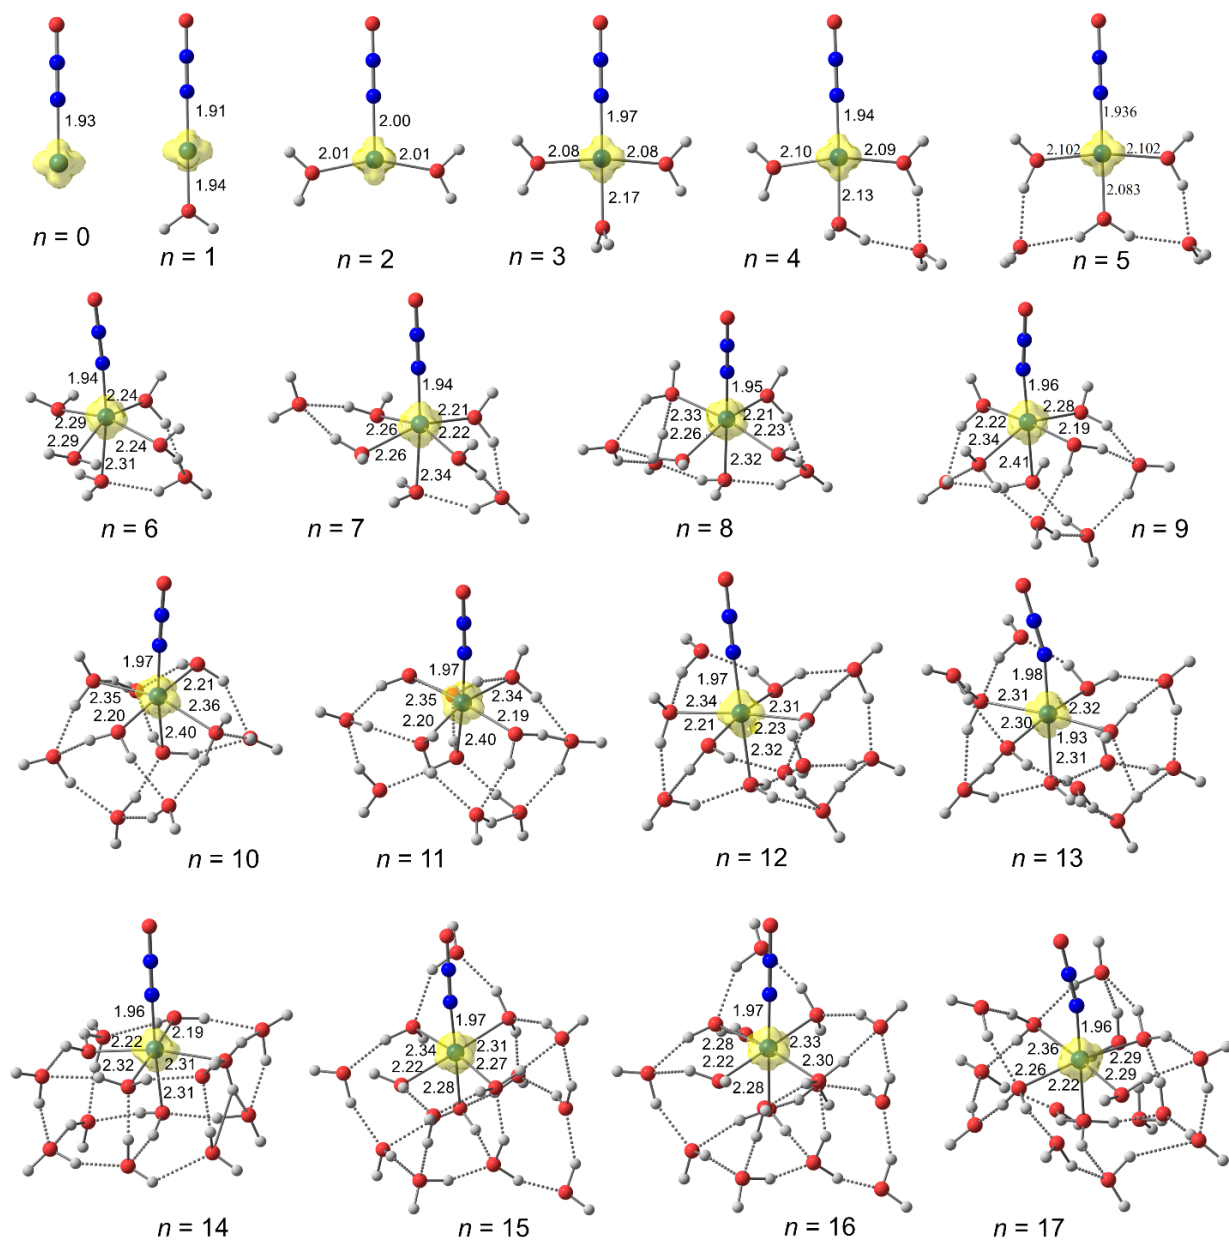

**Figure S3:** Lowest-lying geometries of N end-on coordination mode of  $[\text{Co}(\text{N}_2\text{O})(\text{H}_2\text{O})_n]^+$  ( $\eta^1\text{-NL}$ ),  $n = 1 - 17$ , at the ground triplet electronic state. Bond lengths are displaced in Å.

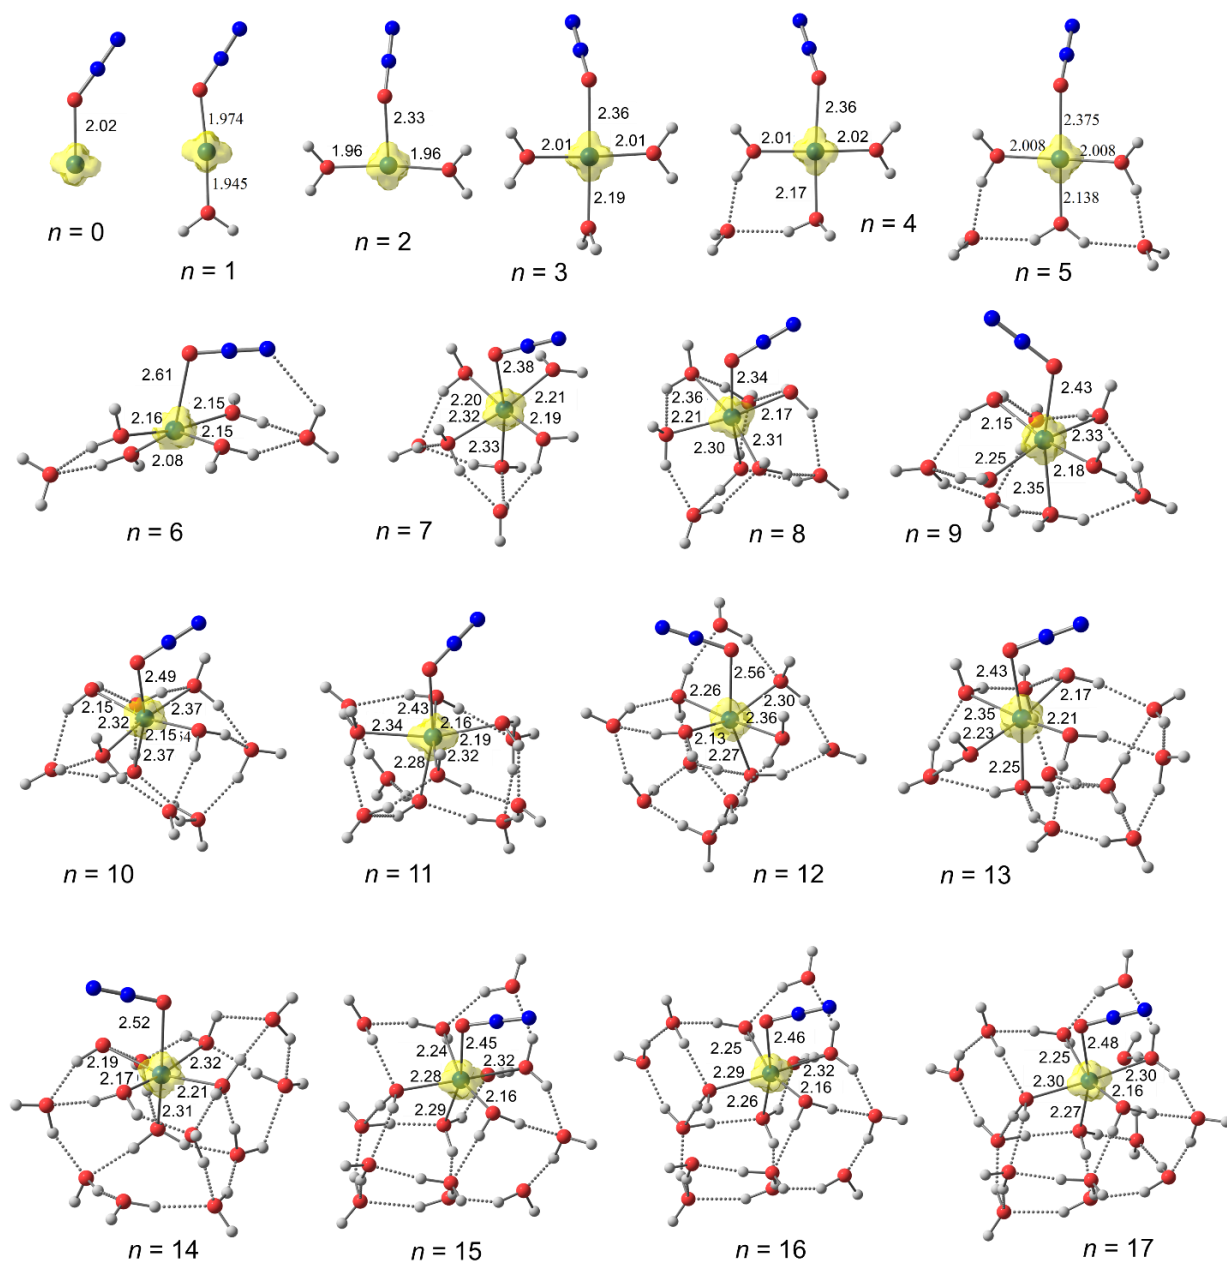

**Figure S4:** Lowest-lying geometries of O end-on coordination mode of  $[\text{Co}(\text{N}_2\text{O})(\text{H}_2\text{O})_n]^+$  ( $\eta^1\text{-OL}$ ),  $n = 1 - 17$ , at the ground triplet electronic state. Bond lengths are displaced in Å.

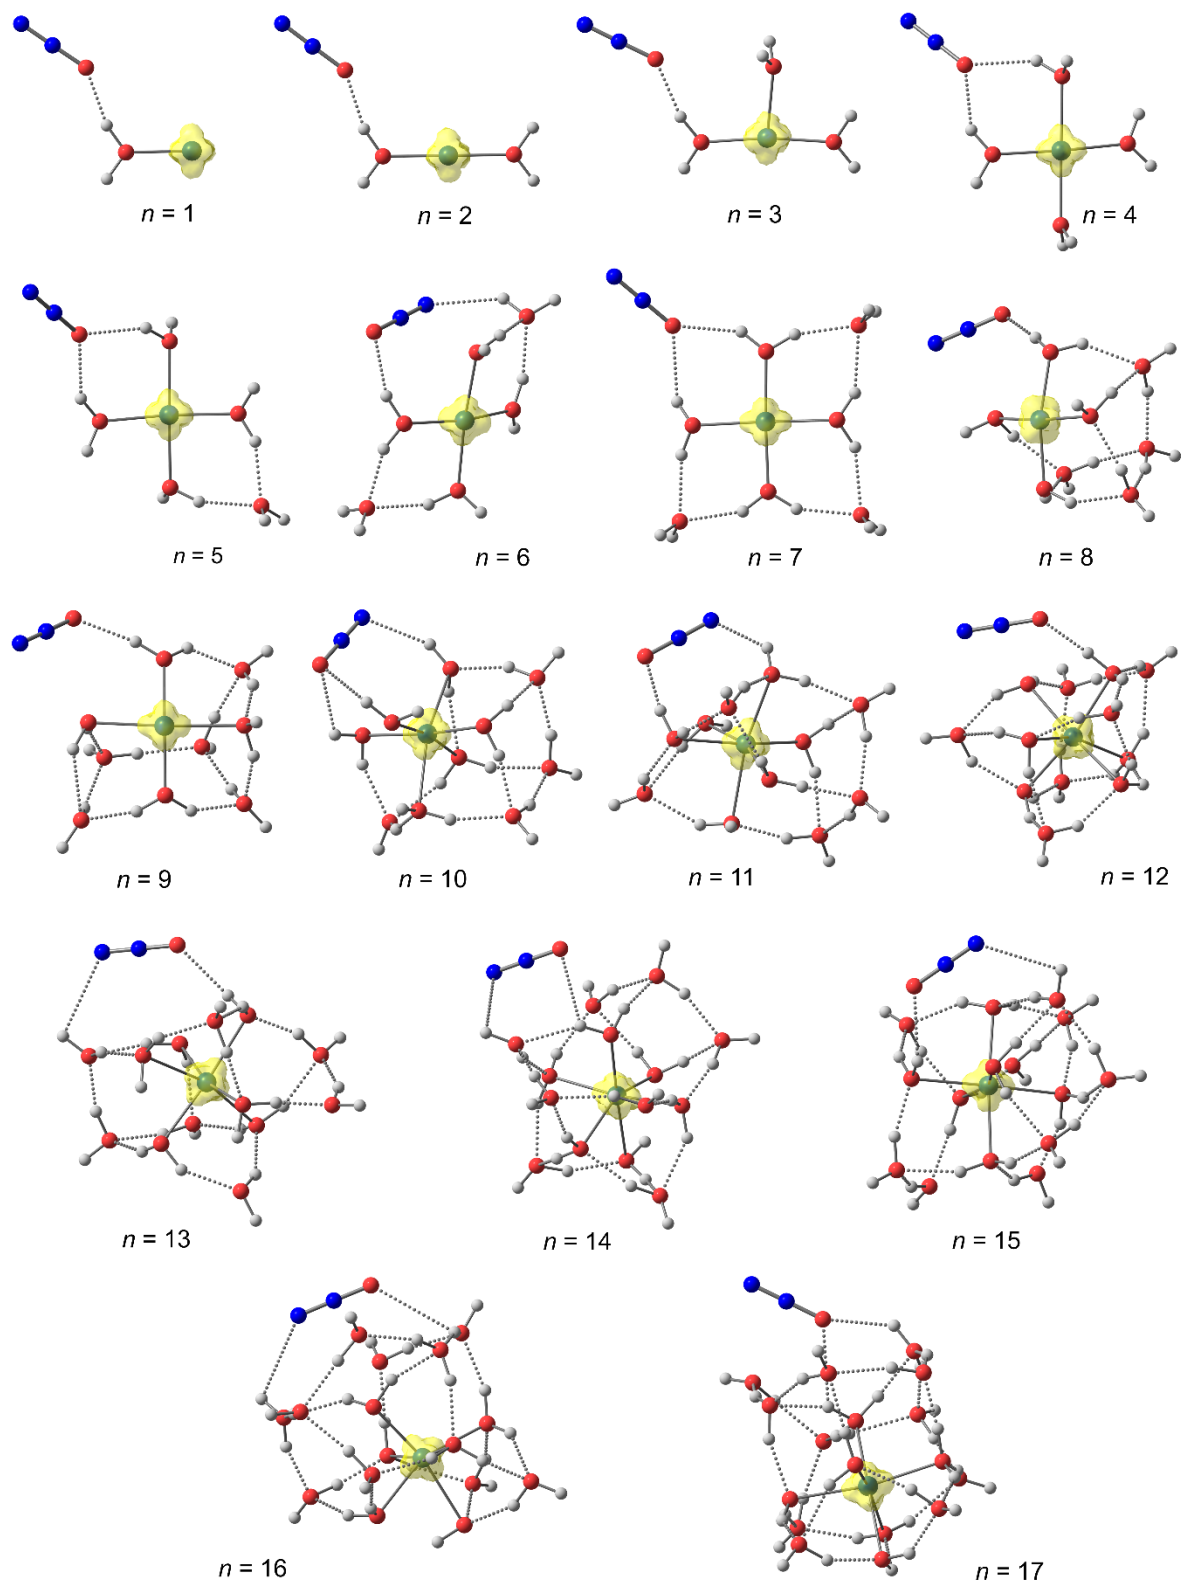

**Figure S5:** Lowest-lying geometries of surface-solvated mode of  $[\text{Co}(\text{N}_2\text{O})(\text{H}_2\text{O})_n]^+$ ,  $n = 1 - 17$ , at the ground triplet electronic state.

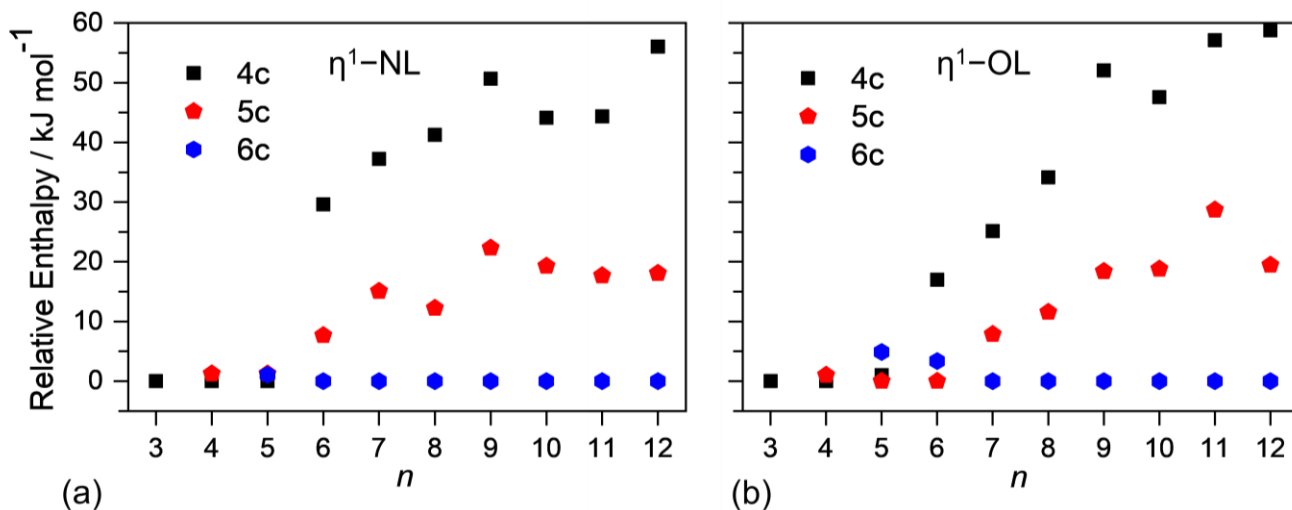

**Figure S6:** Relative enthalpies at 0 K ( $\Delta H_0^\circ / \text{kJ mol}^{-1}$ ) of lowest-lying conformers of (a)  $\eta^1\text{-NL}$  and (b)  $\eta^1\text{-OL}$  coordination modes of  $[\text{Co}(\text{N}_2\text{O})(\text{H}_2\text{O})_n]^+$  ( $n = 3 - 12$ ) with tetra-, penta-, and hexa-coordinate cores (4c, 5c, and 6c, respectively).

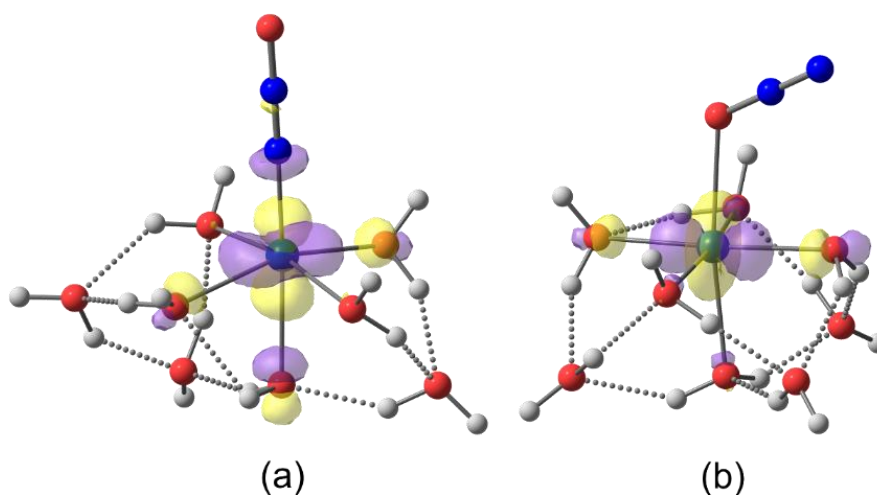

**Figure S7:** The singly occupied molecular orbital (SOMO) of (a)  $\eta^1\text{-NL}$  and (b)  $\eta^1\text{-OL}$  of  $[\text{Co}^+(\text{N}_2\text{O})(\text{H}_2\text{O})_8]$ .

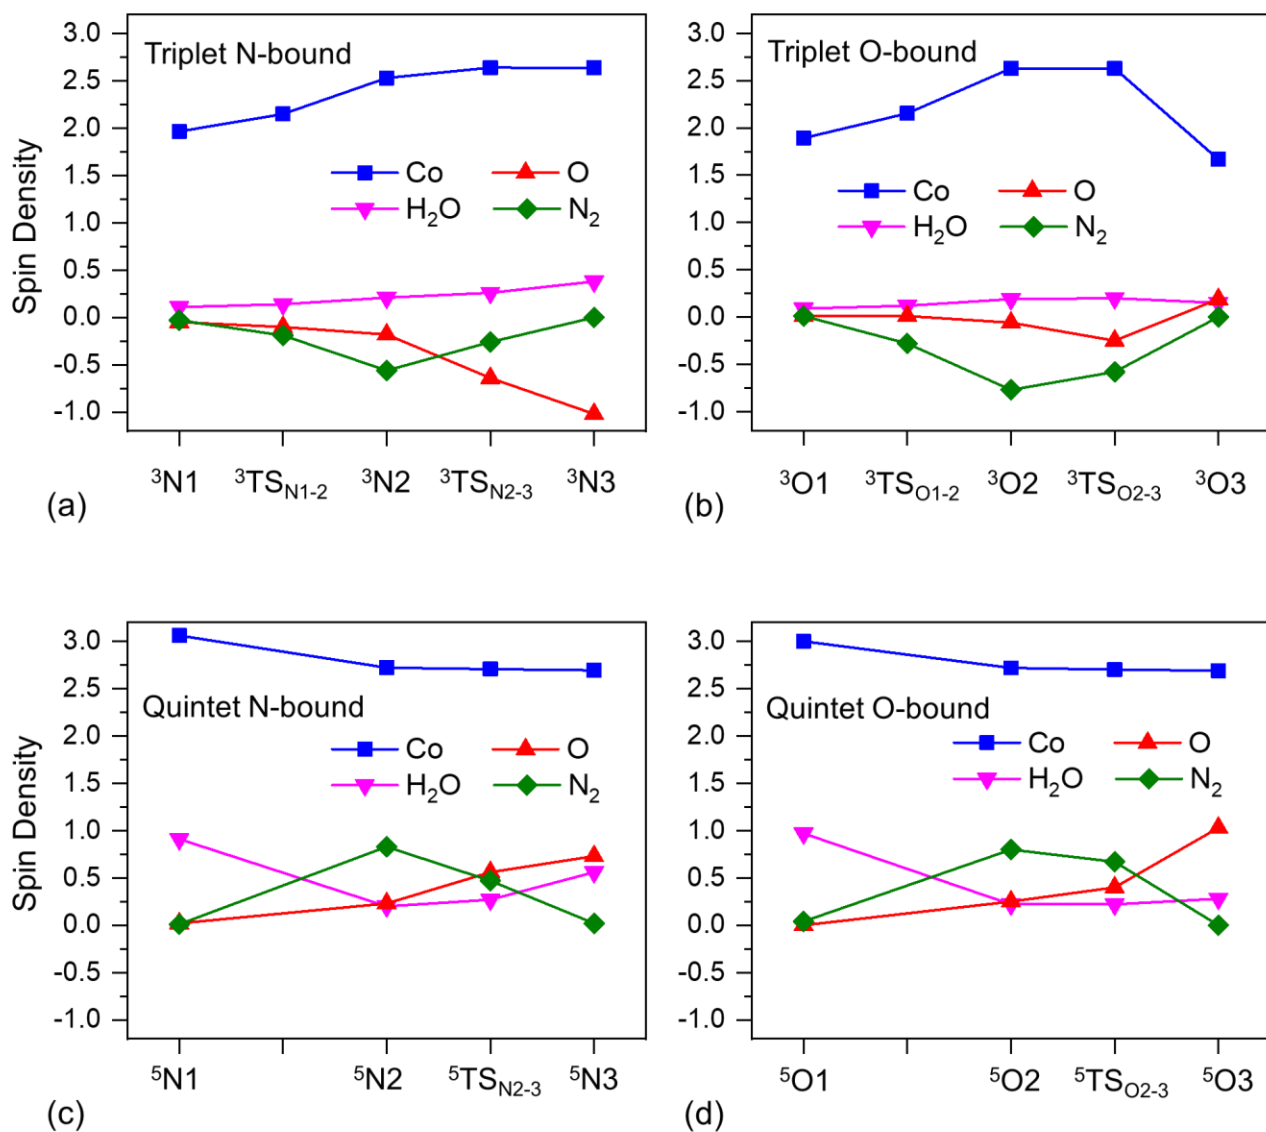

**Figure S8:** NBO spin density population analysis of Co, the N<sub>2</sub> moiety of N<sub>2</sub>O, the O moiety of N<sub>2</sub>O and the sum of all H<sub>2</sub>O molecules along the reaction pathways (electron transfer and N–O bond dissociation) in [Co(N<sub>2</sub>O)(H<sub>2</sub>O)<sub>8</sub>]<sup>+</sup> as shown in Figure 7 for triplet state of (a) N-bound & (b) O-bound and quintet state of (c) N-bound & (d) O-bound coordination.



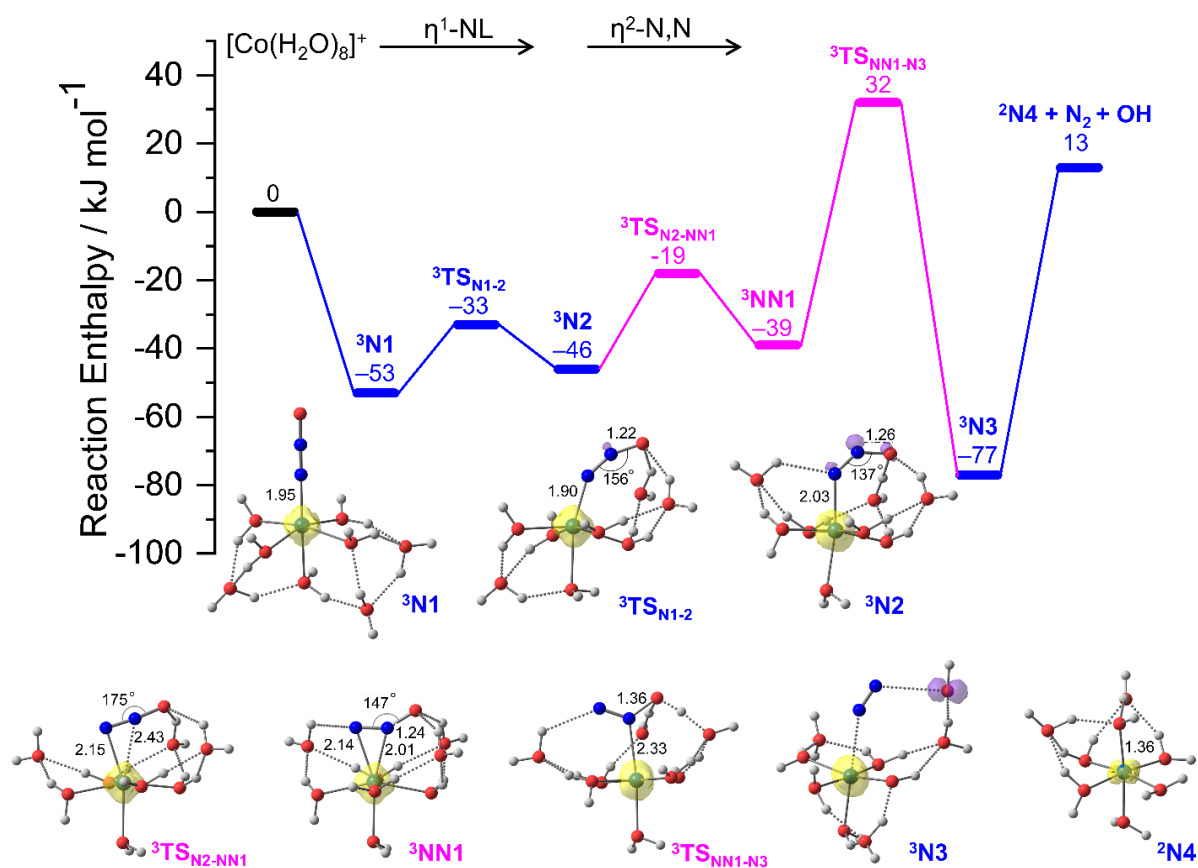

**Figure S9:** Potential energy surfaces of the reaction between  $[\text{Co}(\text{H}_2\text{O})_8]^+$  and  $\text{N}_2\text{O}$ , resulting in  $[\text{CoOH}(\text{H}_2\text{O})_7]^+$ ,  $\text{N}_2$  and  $\text{OH}$  (Reaction 2), through the N-bound mode involving the  $\eta^2\text{-N,N}$  species (pink). Optimized geometries (bond lengths in Å and angles in °) with spin density distribution (an isovalue of 0.06 au) and their relative enthalpies (in  $\text{kJ mol}^{-1}$ ) along the reaction pathways were evaluated at the M06/6-311++G\*\* level of theory.

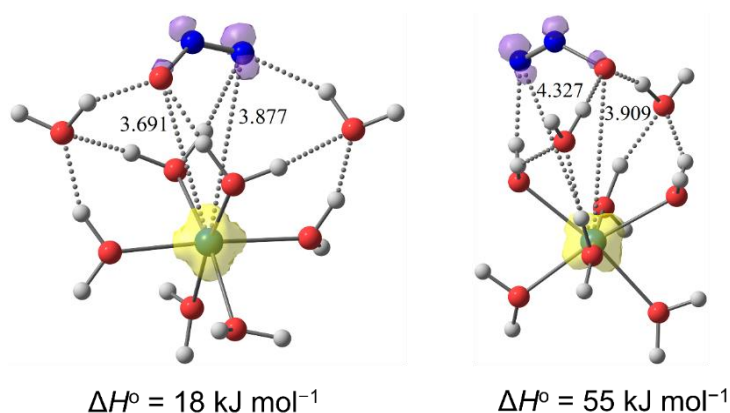

**Figure S10:** Transition structures for the reduction of  $\text{N}_2\text{O}$  solvated on the cluster surface of  $[\text{Co}(\text{N}_2\text{O})_8]^+$  with different distances from the metal core.

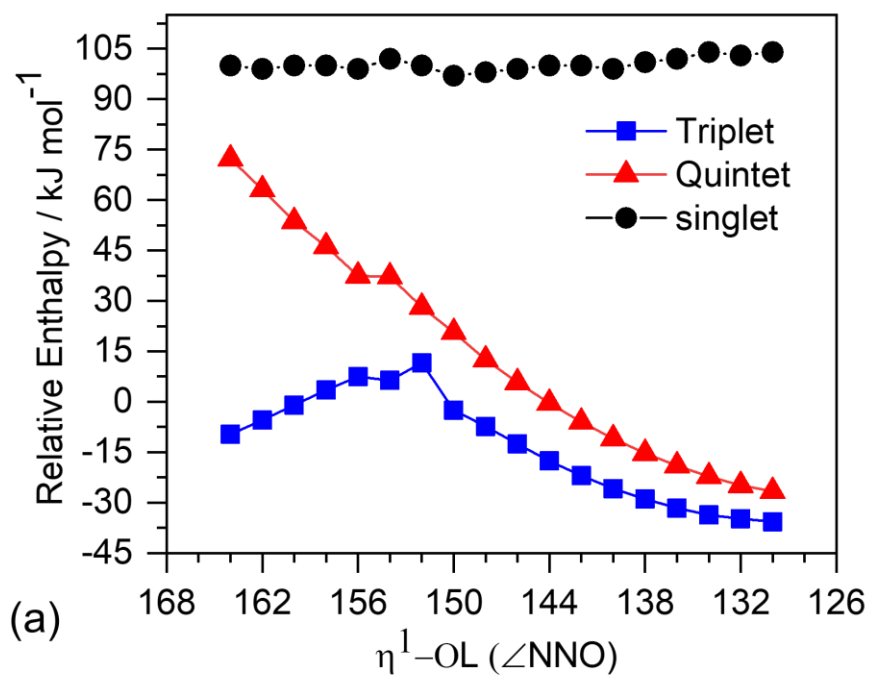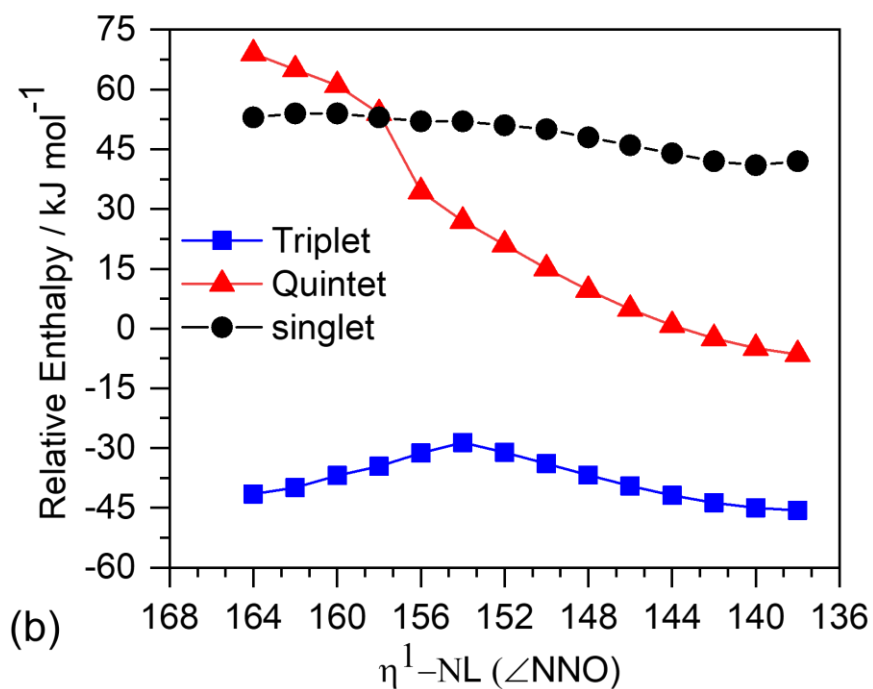

**Figure S11:** Potential energy surface scans of the singlet, triplet, and quintet electronic states for (a)  $\eta^1\text{-OL}$  and (b)  $\eta^1\text{-NL}$  with respect to their  $\angle\text{NNO}$  angles. The electron-transfer process on the triplet surface is preferred.

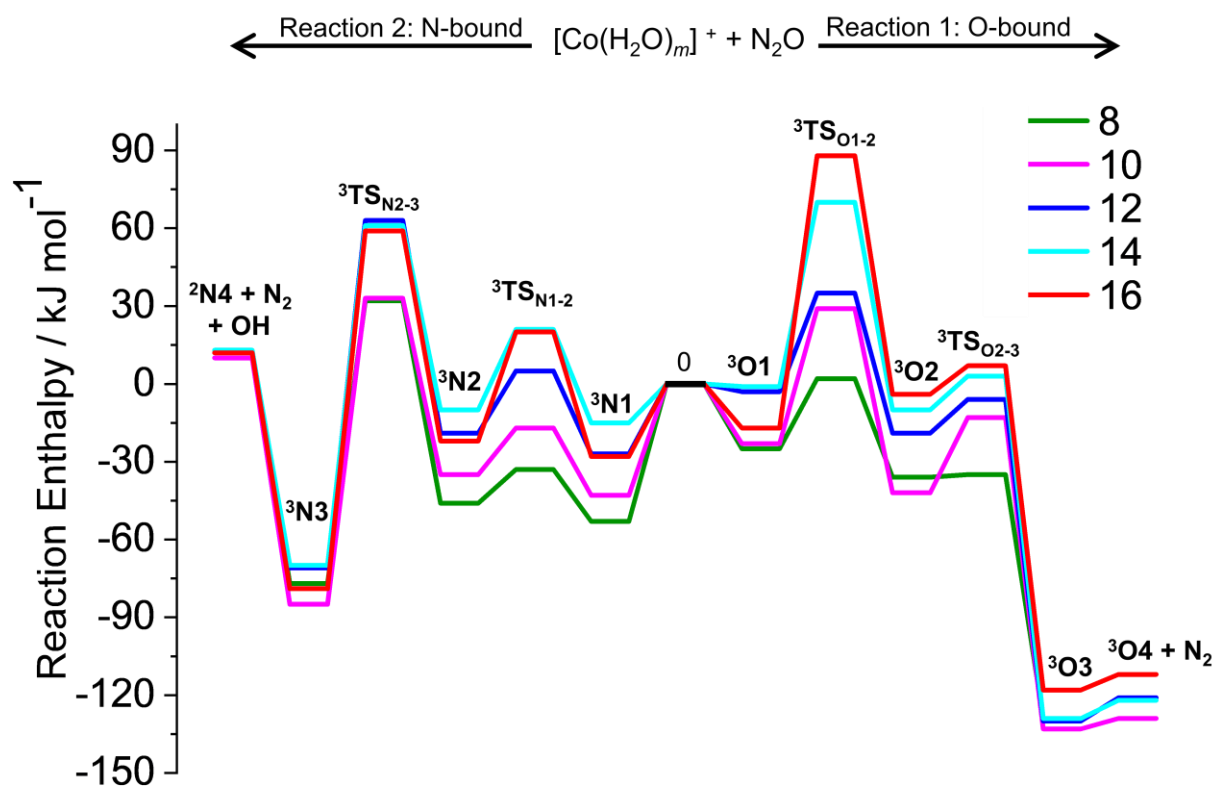

**Figure S12:** Potential energy surfaces of the reactions between  $[\text{Co}(\text{H}_2\text{O})_n]^+$  ( $n = 8, 10, 12, 14$  and  $16$ ) and  $\text{N}_2\text{O}$  through (a) the O-bound mode resulting in  $[\text{CoO}(\text{H}_2\text{O})_{n-x}]^+$ ,  $\text{N}_2$ , and  $x\text{H}_2\text{O}$  (Reaction 1) and (b) the N-bound mode resulting in  $[\text{CoOH}(\text{H}_2\text{O})_{n-x}]^+$ ,  $\text{N}_2$ ,  $\text{OH}$ , and  $x\text{H}_2\text{O}$  (Reaction 2) at the triplet electronic state. Their relative enthalpies (in  $\text{kJ mol}^{-1}$ ) along the reaction pathways were evaluated at the M06/6-311++G\*\* level of theory.

**Table S1:** Cartesian coordinates, harmonic vibration analyses (frequency in  $\text{cm}^{-1}$ , IR intensity in  $\text{km mol}^{-1}$ ) and energies ( $E$ ,  $E_{\text{zpc}}$ ,  $H_{298}$ ,  $G_{298}$  in a.u.) of the optimized geometries discussed in main text.

|                                                         |           |           |           |                                                         |           |           |           |
|---------------------------------------------------------|-----------|-----------|-----------|---------------------------------------------------------|-----------|-----------|-----------|
| $[\text{Co}(\text{H}_2\text{O})_1]^+$                   |           |           |           | $[\text{Co}(\text{H}_2\text{O})_5]^+$                   |           |           |           |
| Co                                                      | 0.000000  | 0.000000  | 0.560847  | Co                                                      | -0.510708 | 0.012923  | 0.073750  |
| O                                                       | 0.000000  | 0.000000  | -1.400202 | O                                                       | -1.809683 | 1.553236  | -0.276917 |
| H                                                       | 0.000000  | 0.779014  | -1.970625 | H                                                       | -2.747635 | 1.459076  | -0.466480 |
| H                                                       | 0.000000  | -0.779014 | -1.970625 | O                                                       | -2.208601 | -1.372082 | -0.024624 |
| ---                                                     |           |           |           | H                                                       | -2.641128 | -1.763003 | 0.740230  |
| 335.1, 320.2; 408.6, 6.4; 612.3, 87.6; 1646.9, 90.1;    |           |           |           | O                                                       | 0.878722  | -1.474856 | 0.118906  |
| 3812.2, 162.1; 3899.3, 293.4;                           |           |           |           | H                                                       | 1.820737  | -1.273776 | -0.018997 |
| -1458.796903940 -1458.772494 -1458.767883 -             |           |           |           | O                                                       | 1.058755  | 1.494762  | 0.302270  |
| 1458.797437                                             |           |           |           | H                                                       | 1.110764  | 2.001091  | 1.117918  |
| $[\text{Co}(\text{H}_2\text{O})_2]^+$                   |           |           |           | H                                                       | -1.528102 | 2.428578  | -0.559021 |
| Co                                                      | 0.000000  | -0.000002 | 0.000000  | H                                                       | 1.952555  | 1.157559  | 0.126870  |
| O                                                       | 1.931818  | 0.000010  | 0.000030  | H                                                       | -2.515995 | -1.852001 | -0.799085 |
| O                                                       | -1.931818 | -0.000004 | -0.000034 | H                                                       | 0.734900  | -2.418131 | 0.013444  |
| H                                                       | 2.497005  | 0.781166  | -0.000092 | O                                                       | 3.312284  | -0.166603 | -0.281209 |
| H                                                       | 2.496951  | -0.781221 | -0.000092 | H                                                       | 4.064760  | -0.255656 | 0.313479  |
| H                                                       | -2.497009 | -0.781157 | 0.000104  | H                                                       | 3.686449  | -0.108317 | -1.167018 |
| H                                                       | -2.496947 | 0.781229  | 0.000104  | ---                                                     |           |           |           |
| ---                                                     |           |           |           | 34.9, 11.4; 47.7, 16.2; 58.8, 0.7; 90.8, 2.8; 112.3,    |           |           |           |
| 104.7, 21.2; 137.7, 16.5; 187.7, 0.0; 284.5, 0.0;       |           |           |           | 10.7; 124.5, 2.7; 159.6, 21.8; 171.9, 12.8; 199.5,      |           |           |           |
| 309.7, 542.9; 382.1, 0.0; 503.4, 11.1; 590.6, 0.0;      |           |           |           | 11.4; 221.8, 13.4; 230.0, 132.2; 243.2, 171.4; 254.6,   |           |           |           |
| 637.6, 114.4; 1641.0, 0.0; 1641.8, 202.4; 3827.5,       |           |           |           | 47.2; 282.1, 137.3; 286.9, 27.3; 298.0, 19.4; 319.1,    |           |           |           |
| 321.8; 3830.8, 0.0; 3917.7, 0.0; 3919.1, 562.8;         |           |           |           | 4.3; 331.9, 14.3; 351.5, 73.3; 383.1, 47.1; 425.7,      |           |           |           |
| -1535.284435830 -1535.234508 -1535.227052 -             |           |           |           | 75.2; 454.4, 108.2; 494.6, 55.8; 540.4, 54.9; 593.8,    |           |           |           |
| 1535.264117                                             |           |           |           | 313.2; 695.5, 154.0; 708.5, 99.6; 1602.7, 196.7;        |           |           |           |
| $[\text{Co}(\text{H}_2\text{O})_3]^+$                   |           |           |           | 1603.8, 35.9; 1611.5, 94.1; 1625.0, 96.3; 1646.8, 20.2; |           |           |           |
| Co                                                      | -0.000001 | 0.355539  | 0.000001  | 3674.9, 290.0; 3725.7, 643.8; 3845.9, 38.6; 3852.6,     |           |           |           |
| O                                                       | -1.966194 | 0.491750  | 0.000000  | 51.0; 3853.3, 52.3; 3923.3, 179.5; 3937.5, 160.5;       |           |           |           |
| O                                                       | 1.966191  | 0.491758  | 0.000001  | 3946.8, 172.1; 3962.6, 183.2; 3962.9, 177.3;            |           |           |           |
| O                                                       | 0.000004  | -1.834078 | -0.000004 | -1764.630738930 -1764.505689 -1764.489286 -             |           |           |           |
| H                                                       | 0.000016  | -2.406305 | 0.773995  | 1764.548482                                             |           |           |           |
| H                                                       | 0.000012  | -2.406306 | -0.774002 | $[\text{Co}(\text{H}_2\text{O})_6]^+$                   |           |           |           |
| H                                                       | -2.546991 | -0.276280 | -0.000002 | Co                                                      | 0.000033  | 0.000003  | -0.255645 |
| H                                                       | -2.511250 | 1.285077  | 0.000002  | O                                                       | -1.393740 | -1.480115 | 0.012076  |
| H                                                       | 2.546991  | -0.276271 | -0.000008 | H                                                       | -2.293621 | -1.255260 | 0.302078  |
| H                                                       | 2.511244  | 1.285086  | 0.000010  | O                                                       | -1.554432 | 1.509171  | -0.336210 |
| ---                                                     |           |           |           | H                                                       | -1.694708 | 1.993400  | -1.154631 |
| 18.1, 18.9; 96.7, 21.6; 124.3, 15.6; 155.9, 0.0; 194.7, |           |           |           | O                                                       | 1.393744  | 1.480116  | 0.012439  |
| 28.3; 257.8, 0.0; 265.8, 2.4; 278.3, 430.0; 282.8,      |           |           |           | H                                                       | 2.293545  | 1.255255  | 0.302685  |
| 249.9; 306.9, 0.0; 344.6, 0.2; 443.5, 99.8; 449.9,      |           |           |           | O                                                       | 1.554526  | -1.509171 | -0.335823 |
| 25.3; 547.1, 4.3; 588.5, 126.0; 1619.8, 94.5; 1625.6,   |           |           |           | H                                                       | 1.694989  | -1.993425 | -1.154196 |
| 199.4; 1626.4, 0.5; 3843.5, 218.3; 3844.8, 71.0;        |           |           |           | H                                                       | -1.154447 | -2.342666 | 0.360994  |
| 3846.0, 1.8; 3942.1, 2.2; 3943.2, 472.7; 3951.1, 189.8; |           |           |           | H                                                       | 2.423454  | -1.181021 | -0.052221 |
| -1611.737251520 -1611.662989 -1611.652167 -             |           |           |           | H                                                       | -2.423424 | 1.181024  | -0.052802 |
| 1611.698933                                             |           |           |           | H                                                       | 1.154369  | 2.342676  | 0.361280  |
| $[\text{Co}(\text{H}_2\text{O})_4]^+$                   |           |           |           | O                                                       | 3.741934  | 0.074883  | 0.618888  |
| Co                                                      | 0.000064  | 0.000010  | -0.000031 | H                                                       | 4.548498  | 0.221512  | 0.113490  |
| O                                                       | -0.796543 | -1.868541 | -0.000128 | H                                                       | 4.027509  | -0.081326 | 1.525278  |
| O                                                       | 2.095968  | -0.670597 | 0.000164  | O                                                       | -3.742105 | -0.074888 | 0.617885  |
| O                                                       | 0.796334  | 1.868611  | -0.000422 | H                                                       | -4.027964 | 0.081285  | 1.524191  |
| O                                                       | -2.095967 | 0.670462  | 0.000075  | H                                                       | -4.548509 | -0.221505 | 0.112230  |
| H                                                       | -1.749505 | -2.003418 | 0.000255  | ---                                                     |           |           |           |
| H                                                       | -0.367276 | -2.728473 | 0.000983  | 28.4, 11.1; 48.5, 1.6; 69.1, 0.0; 73.7, 4.2; 93.3, 0.0; |           |           |           |
| H                                                       | -2.558088 | 1.010693  | -0.772327 | 114.0, 3.6; 128.7, 0.4; 153.9, 3.0; 173.4, 5.5; 216.9,  |           |           |           |
| H                                                       | -2.557536 | 1.010223  | 0.773013  | 0.0; 223.9, 4.8; 224.4, 23.7; 243.5, 16.6; 249.3, 40.2; |           |           |           |
| H                                                       | 0.367144  | 2.728584  | 0.000536  | 258.6, 3.5; 260.4, 45.8; 302.1, 13.6; 323.3, 43.2;      |           |           |           |
| H                                                       | 1.749305  | 2.003468  | -0.000062 | 323.7, 51.8; 324.8, 29.7; 342.6, 146.4; 365.7, 39.9;    |           |           |           |
| H                                                       | 2.557670  | -1.010134 | 0.773121  | 381.0, 47.2; 444.4, 3.5; 448.1, 305.7; 528.8, 127.6;    |           |           |           |
| H                                                       | 2.558223  | -1.010703 | -0.772211 | 531.2, 95.8; 562.5, 1.4; 592.3, 314.6; 687.7, 107.5;    |           |           |           |
| ---                                                     |           |           |           | 688.3, 381.2; 713.4, 71.7; 717.7, 15.0; 1597.1, 167.5;  |           |           |           |
| 54.3, 0.1; 73.3, 0.0; 94.7, 6.5; 109.6, 12.9; 133.1,    |           |           |           | 1598.3, 80.4; 1620.1, 207.2; 1620.2, 10.1; 1640.0, 4.4; |           |           |           |
| 12.0; 179.2, 0.0; 188.7, 0.0; 194.3, 5.1; 238.2, 357.9; |           |           |           | 1641.4, 21.9; 3692.9, 9.8; 3695.5, 345.7; 3726.2,       |           |           |           |
| 239.6, 0.6; 276.6, 12.8; 310.1, 0.0; 316.0, 0.0; 326.7, |           |           |           | 1264.2; 3731.5, 116.6; 3848.0, 61.0; 3848.0, 10.1;      |           |           |           |
| 416.0; 341.2, 0.0; 375.5, 94.0; 392.6, 138.8; 432.3,    |           |           |           | 3924.8, 203.5; 3925.1, 192.0; 3931.3, 0.9; 3932.2,      |           |           |           |
| 0.0; 449.8, 113.3; 500.2, 0.0; 538.7, 142.9; 1610.3,    |           |           |           | 317.4; 3950.2, 52.6; 3950.4, 289.7;                     |           |           |           |
| 228.3; 1612.5, 0.0; 1613.5, 152.7; 1613.5, 17.4;        |           |           |           | -1841.074794780 -1840.922816 -1840.904465 -             |           |           |           |
| 3845.8, 114.1; 3846.5, 0.0; 3851.0, 129.2; 3852.1, 0.1; |           |           |           | 1840.967973                                             |           |           |           |
| 3954.0, 0.0; 3954.6, 348.9; 3959.5, 0.4; 3960.6, 374.9; |           |           |           | $[\text{Co}(\text{H}_2\text{O})_7]^+$                   |           |           |           |
| -1688.186144830 -1688.087185 -1688.073269 -             |           |           |           | Co                                                      | 0.006021  | -0.407060 | 0.190738  |
| 1688.125959                                             |           |           |           | O                                                       | 1.439645  | 1.054382  | 0.175839  |
|                                                         |           |           |           | H                                                       | 2.346262  | 0.868755  | -0.109954 |
|                                                         |           |           |           | O                                                       | 1.526354  | -1.965679 | 0.264727  |

|   |           |           |           |
|---|-----------|-----------|-----------|
| H | 2.403388  | -1.621137 | 0.030442  |
| O | -1.417161 | -1.860688 | -0.088383 |
| H | -2.337017 | -1.621182 | -0.290835 |
| O | -1.531077 | 1.080513  | 0.276804  |
| H | -1.301118 | 1.988076  | 0.032807  |
| H | 1.207040  | 1.981282  | 0.011049  |
| H | -2.406736 | 0.864932  | -0.072556 |
| H | 1.629448  | -2.433187 | 1.098264  |
| H | -1.222598 | -2.727887 | -0.451503 |
| O | -3.836315 | -0.484407 | -0.405322 |
| H | -4.374569 | -0.464481 | -1.202769 |
| H | -4.456641 | -0.554755 | 0.327764  |
| O | 3.775701  | -0.369524 | -0.533109 |
| H | 4.593721  | -0.316982 | -0.028382 |
| H | 4.043337  | -0.472796 | -1.452075 |
| O | 0.005884  | 3.470273  | -0.062206 |
| H | -0.005254 | 4.014426  | 0.732047  |
| H | 0.013922  | 4.086596  | -0.801026 |

---  
 23.8, 3.2; 35.2, 11.2; 49.6, 14.8; 66.5, 1.1; 78.0, 4.0; 92.0, 2.2; 95.0, 1.2; 118.7, 2.4; 131.8, 0.8; 147.6, 1.2; 172.1, 2.6; 199.0, 12.7; 203.5, 0.6; 204.3, 11.7; 218.5, 20.2; 224.9, 5.0; 234.8, 18.1; 243.9, 63.5; 253.6, 12.7; 262.4, 2.3; 271.8, 8.1; 297.8, 40.7; 316.7, 38.6; 330.7, 0.9; 352.6, 52.8; 380.6, 52.7; 412.1, 92.0; 433.8, 255.4; 438.3, 132.0; 514.8, 53.3; 541.2, 87.3; 580.8, 131.1; 598.9, 63.9; 616.6, 238.3; 642.9, 524.5; 668.7, 201.8; 697.7, 79.5; 720.2, 78.6; 759.5, 30.8; 1575.1, 46.5; 1588.8, 189.2; 1598.2, 93.2; 1614.9, 75.7; 1622.4, 73.3; 1631.2, 46.1; 1638.5, 12.0; 3697.6, 410.4; 3705.6, 24.0; 3725.2, 349.5; 3746.7, 199.1; 3802.6, 976.0; 3834.1, 641.4; 3853.3, 15.8; 3855.1, 8.9; 3864.3, 115.1; 3925.0, 156.4; 3939.9, 183.1; 3956.9, 128.8; 3957.9, 138.9; 3959.4, 213.9;

-1917.515325380 -1917.338258 -1917.316821 -1917.388006

|                                                   |           |           |           |
|---------------------------------------------------|-----------|-----------|-----------|
| [Co(H <sub>2</sub> O) <sub>9</sub> ] <sup>+</sup> |           |           |           |
| Co                                                | -0.639804 | -0.635424 | -0.609322 |
| O                                                 | -2.647768 | -0.283325 | 0.202404  |
| H                                                 | -2.596825 | 0.587929  | 0.632785  |
| O                                                 | 2.137589  | 1.550416  | -1.082183 |
| H                                                 | 2.865295  | 2.011658  | -1.508528 |
| O                                                 | 1.543674  | -1.118166 | -1.163269 |
| H                                                 | 1.667208  | -1.827118 | -1.803222 |
| O                                                 | -0.586865 | 1.231087  | -1.413567 |
| H                                                 | 0.300299  | 1.606461  | -1.543257 |
| O                                                 | 1.865327  | -1.296931 | 1.561500  |
| H                                                 | 2.556762  | -1.569238 | 2.171457  |
| O                                                 | -0.573229 | -2.201746 | 0.700606  |
| H                                                 | -1.361931 | -2.285364 | 1.246337  |
| H                                                 | 2.209232  | 0.603019  | -1.306665 |
| H                                                 | -1.067656 | 1.845126  | -0.833853 |
| H                                                 | 1.885580  | -1.432565 | -0.303289 |
| H                                                 | 1.672517  | -0.354150 | 1.739620  |
| H                                                 | 0.206358  | -2.166830 | 1.281691  |
| H                                                 | -3.457336 | -0.304776 | -0.315456 |
| O                                                 | 1.241079  | 1.471111  | 1.557674  |
| H                                                 | 1.632618  | 1.647980  | 0.676751  |
| H                                                 | 1.705566  | 2.046195  | 2.174483  |
| O                                                 | -1.533935 | 2.136810  | 1.040301  |
| H                                                 | -1.854435 | 2.911940  | 1.509489  |
| H                                                 | -0.655509 | 1.922120  | 1.405617  |

---  
 57.9, 0.2; 64.0, 0.1; 76.7, 0.6; 93.2, 2.7; 99.7, 1.0; 110.6, 2.3; 130.0, 4.1; 138.4, 2.1; 162.5, 2.7; 164.7, 1.9; 185.8, 2.7; 191.6, 4.4; 205.7, 7.7; 215.0, 7.1; 245.2, 12.6; 248.8, 2.5; 259.9, 0.4; 266.8, 20.5; 273.3, 17.7; 325.2, 22.1; 331.7, 24.2; 344.6, 24.4; 356.0, 7.8; 367.4, 23.8; 388.7, 34.4; 395.1, 8.8; 404.8, 21.4; 424.5, 201.0; 442.6, 31.8; 464.2, 30.1; 476.4, 107.1; 488.6, 119.5; 521.9, 63.5; 540.5, 262.1; 570.1, 29.6; 593.2, 328.4; 616.8, 118.1; 661.2, 19.1; 679.6, 754.0; 696.5, 70.1; 753.6, 107.0; 783.4, 53.0; 808.0, 136.2; 839.1, 35.0; 917.1, 106.8; 1591.1, 173.4; 1600.9, 54.3; 1609.6, 26.7; 1611.7, 103.1; 1624.8, 135.5; 1634.9, 105.7; 1636.6, 12.7; 1673.0, 33.8; 3545.3, 131.1; 3597.9, 431.8; 3616.3, 607.9; 3648.0, 104.3; 3666.6, 528.1; 3686.6, 4.2; 3700.8, 451.9; 3714.3, 495.7; 3765.0, 687.7; 3898.6, 172.4; 3902.2, 110.4; 3903.7, 219.3; 3924.2, 189.0; 3925.2, 166.9; 3928.8, 172.9; 3931.6, 96.9;

-1993.961028530 -1993.754358 -1993.733064 -1993.801126

|                                                   |           |           |           |
|---------------------------------------------------|-----------|-----------|-----------|
| [Co(H <sub>2</sub> O) <sub>9</sub> ] <sup>+</sup> |           |           |           |
| Co                                                | 0.030743  | -0.822680 | -0.676820 |
| O                                                 | 1.039123  | -2.192732 | 0.437428  |
| H                                                 | 1.776633  | -1.864778 | 0.978220  |
| O                                                 | 0.835888  | 1.565630  | 1.797932  |
| H                                                 | 1.081063  | 2.108156  | 2.554449  |
| O                                                 | 2.022374  | 0.085116  | -1.405399 |
| H                                                 | 1.836836  | 1.042317  | -1.479883 |
| H                                                 | 1.539672  | 0.887947  | 1.715605  |
| H                                                 | 2.327089  | -0.224509 | -2.264518 |
| H                                                 | 0.519894  | -2.828768 | 0.938727  |
| O                                                 | -1.755989 | -1.732086 | 0.199084  |
| H                                                 | -2.554678 | -1.667303 | -0.336207 |
| H                                                 | -1.917779 | -1.137684 | 0.953463  |
| O                                                 | -0.961072 | 0.712772  | -1.522374 |
| H                                                 | -0.518160 | 1.575477  | -1.493775 |
| H                                                 | -1.896642 | 0.828124  | -1.256839 |
| O                                                 | -3.386954 | 0.697008  | -0.313606 |
| H                                                 | -3.117861 | 0.862799  | 0.604564  |
| H                                                 | -4.240026 | 1.114648  | -0.452674 |
| O                                                 | -1.822474 | 0.455262  | 1.990509  |
| H                                                 | -2.054052 | 0.465412  | 2.923325  |
| H                                                 | -0.923285 | 0.830871  | 1.925383  |
| O                                                 | 0.993243  | 2.548362  | -0.839997 |
| H                                                 | 1.229745  | 3.467940  | -0.987555 |
| H                                                 | 0.920846  | 2.410343  | 0.124966  |
| O                                                 | 2.851726  | -0.291881 | 1.173006  |
| H                                                 | 2.874154  | -0.157524 | 0.204776  |
| H                                                 | 3.759567  | -0.280707 | 1.489432  |

---  
 45.7, 1.2; 51.4, 0.5; 62.1, 1.1; 67.1, 2.1; 77.7, 4.0; 93.4, 0.1; 105.3, 2.3; 110.4, 5.1; 122.2, 0.4; 135.6, 4.0; 158.8, 2.0; 169.5, 8.4; 179.1, 2.3; 188.8, 1.3; 208.2, 7.0; 224.3, 14.1; 234.5, 2.0; 246.4, 27.1; 254.1, 4.1; 266.0, 16.3; 275.7, 21.9; 292.3, 33.1; 294.6, 4.7; 324.1, 86.2; 337.2, 6.1; 348.8, 34.2; 359.2, 6.4; 364.3, 51.6; 374.5, 9.2; 391.9, 48.0; 408.4, 47.3; 413.6, 118.5; 436.5, 76.8; 450.1, 107.5; 469.2, 56.9; 474.9, 247.8; 501.9, 57.5; 506.1, 24.5; 554.2, 161.7; 568.1, 170.0; 608.9, 11.3; 615.7, 195.2; 667.5, 178.8; 687.3, 240.2; 720.1, 320.5; 734.8, 248.1; 782.5, 108.0; 785.6, 82.7; 817.3, 52.6; 904.0, 72.3; 914.1, 128.5; 1584.1, 210.2; 1588.6, 120.3; 1593.4, 15.2; 1613.6, 65.8; 1616.5, 35.7; 1627.0, 232.3; 1638.6, 21.9; 1650.1, 43.4; 1652.4, 15.5; 3538.2, 126.8; 3564.6, 365.7; 3592.5, 848.9; 3612.0, 673.8; 3634.2, 298.6; 3655.5, 316.4; 3692.9, 302.7; 3717.0, 363.1; 3738.4, 303.8; 3759.2, 605.3; 3891.6, 165.2; 3901.5, 88.1; 3903.3, 179.6; 3914.9, 224.3; 3925.8, 124.1; 928.1, 200.8; 3934.2, 93.4; 3953.3, 189.0;

-2070.402566170 -2070.170637 -2070.146471 -2070.221393

|                                                    |           |           |           |
|----------------------------------------------------|-----------|-----------|-----------|
| [Co(H <sub>2</sub> O) <sub>10</sub> ] <sup>+</sup> |           |           |           |
| Co                                                 | 0.537993  | -0.546460 | 0.258962  |
| O                                                  | 1.302836  | 1.513045  | 1.014652  |
| H                                                  | 0.476124  | 2.010499  | 1.164457  |
| O                                                  | -2.932482 | -1.301575 | -0.392019 |
| H                                                  | -3.716625 | -1.852626 | -0.459610 |
| O                                                  | -0.475868 | -2.201884 | -1.170331 |
| H                                                  | -0.019228 | -3.031356 | -1.335685 |
| O                                                  | -1.249220 | -0.330496 | 1.594433  |
| H                                                  | -2.026844 | -0.732284 | 1.172582  |
| O                                                  | -0.027131 | 0.382990  | -1.740583 |
| H                                                  | 0.710322  | 0.967662  | -1.983682 |
| O                                                  | 2.368290  | -1.008311 | -0.882490 |
| H                                                  | 2.709704  | -0.172704 | -1.247634 |
| H                                                  | -2.179613 | -1.814882 | -0.752695 |
| H                                                  | -1.459310 | 0.610448  | 1.715834  |
| H                                                  | -0.175413 | -1.567749 | -1.843764 |
| H                                                  | -0.842813 | 0.910905  | -1.730256 |
| H                                                  | 3.114960  | -1.464585 | -0.488666 |
| H                                                  | 1.672846  | 1.303103  | 1.878994  |
| O                                                  | -2.560804 | 1.350486  | -1.096517 |
| H                                                  | -2.857111 | 0.437456  | -0.896632 |
| H                                                  | -3.228360 | 1.741598  | 1.666736  |
| O                                                  | -1.332744 | 2.422803  | 1.153956  |
| H                                                  | -1.720918 | 3.208708  | 1.547347  |

H -1.817087 2.244586 0.323269  
O 1.190485 -1.148946 2.341630  
H 1.647957 -1.927571 2.668279  
H 0.286376 -1.185240 2.684985  
O 2.427083 1.673058 -1.489097  
H 2.989593 2.362006 -1.850347  
H 2.226085 1.897089 -0.561086

---  
51.7, 0.9; 62.3, 0.6; 74.9, 0.9; 78.2, 0.3; 83.4, 5.6;  
89.1, 1.8; 96.9, 3.1; 102.7, 2.8; 118.0, 3.4; 122.0,  
3.1; 134.4, 4.2; 150.2, 7.4; 158.3, 3.3; 169.0, 1.7;  
185.2, 6.4; 196.3, 10.5; 209.2, 4.4; 222.8, 11.1;  
237.5, 2.4; 239.5, 21.1; 247.4, 8.9; 256.2, 22.1;  
269.1, 7.0; 277.1, 7.2; 277.7, 25.9; 286.9, 24.9;  
292.7, 24.7; 306.1, 77.0; 325.6, 75.7; 339.4, 33.8;  
347.5, 5.4; 360.4, 55.5; 372.0, 69.0; 374.0, 37.0;  
397.5, 90.2; 411.3, 62.3; 419.8, 16.3; 438.3, 95.6;  
447.8, 134.0; 461.4, 50.8; 488.1, 86.0; 502.8, 139.3;  
530.9, 16.5; 542.0, 104.5; 562.0, 63.5; 601.6, 213.0;  
618.3, 147.3; 649.5, 194.8; 685.3, 714.7; 700.2, 57.2;  
714.7, 227.6; 769.6, 28.2; 779.4, 21.0; 795.8, 192.1;  
820.3, 231.9; 846.8, 41.8; 873.7, 92.6; 1578.2, 66.7;  
1581.6, 95.8; 1584.4, 138.7; 1610.8, 75.6; 1617.3,  
143.7; 1620.6, 155.7; 1632.2, 41.1; 1646.1, 19.8;  
1656.7, 16.3; 1672.1, 13.5; 3532.3, 399.7; 3583.3,  
535.4; 3603.1, 204.4; 3629.5, 549.6; 3654.6, 74.6;  
3668.8, 32.4; 3697.1, 373.5; 3703.9, 905.1; 719.1,  
13.3; 3764.6, 581.5; 3767.7, 975.6; 3783.9, 100.5;  
3894.2, 160.7; 3927.3, 116.9; 3930.1, 157.7; 3933.7,  
185.1; 3935.0, 131.7; 3944.4, 82.5; 3945.5, 262.2;  
3948.0, 131.9;

-2146.847952950 -2146.590664 -2146.563770 -  
2146.643520

[Co(H<sub>2</sub>O)<sub>11</sub>]<sup>+</sup>

Co -0.357470 -0.022685 0.285249  
O 0.347526 -2.100689 1.141018  
H 1.308348 -1.911644 1.173691  
O 1.675707 2.773156 -0.454291  
H 1.904615 3.699021 -0.568335  
O -0.799503 1.834444 -1.073909  
H -1.749162 2.001106 -0.929291  
O 1.113333 0.985977 1.612647  
H 1.461633 1.773253 1.164233  
O 0.522865 -0.545598 -1.682233  
H 0.351429 -1.478134 -1.890371  
O -2.337414 -1.099444 -0.478515  
H -2.004954 -1.849725 -1.003520  
H 0.743305 2.661835 -0.735694  
H 1.876220 0.409386 1.767619  
H -0.722071 1.273684 -1.856976  
H 1.479179 -0.386023 -1.742707  
H -2.602237 -1.480071 0.365694  
O 0.075421 -2.284617 2.044841  
O 3.058755 0.491980 -1.183001  
H 2.682701 1.375655 -0.980482  
H 3.805885 0.636817 -1.769825  
O 2.930797 -1.110930 1.083163  
H 3.755926 -1.483275 1.404530  
H 3.130755 -0.634226 0.252337  
O -1.769953 0.523432 1.895713  
H -2.452845 1.091590 1.505854  
H -1.302338 1.048103 2.553066  
O -0.559840 -3.072035 -1.289602  
H -0.541455 -3.978762 -1.605134  
H -0.190240 -3.057074 -0.386938  
O -3.397763 1.434486 -0.254482  
H -3.349265 0.511979 -0.561816  
H -4.285236 1.755395 -0.433933

45.9, 0.2; 61.8, 4.3; 71.4, 0.8; 75.9, 1.0; 82.7, 4.4;  
85.1, 1.1; 102.3, 3.4; 102.6, 2.3; 110.4, 1.4; 114.1,  
4.2; 125.1, 1.8; 137.8, 2.6; 150.7, 1.1; 156.8, 6.3;  
162.6, 4.0; 171.7, 1.3; 183.1, 12.6; 196.0, 7.0; 202.0,  
8.8; 212.1, 2.3; 221.7, 5.7; 229.5, 5.2; 244.1, 11.4;  
254.6, 33.2; 268.7, 2.0; 272.3, 17.4; 280.8, 19.3;  
283.5, 8.6; 289.9, 6.7; 305.4, 16.1; 334.3, 10.3;  
351.6, 47.1; 358.2, 81.7; 366.3, 34.5; 372.7, 33.8;  
374.5, 48.8; 384.4, 5.3; 393.0, 24.2; 401.6, 68.9;  
424.5, 204.8; 431.7, 82.4; 445.4, 55.3; 457.7, 83.8;  
467.2, 32.5; 483.4, 5.4; 505.7, 131.5; 521.7, 49.6;  
552.1, 188.2; 568.2, 63.3; 581.3, 160.3; 619.8, 306.0;

647.9, 434.5; 655.9, 561.2; 696.8, 154.6; 729.1, 127.9;  
736.8, 206.2; 760.5, 28.3; 781.2, 0.3; 785.3, 213.6;  
796.9, 96.6; 806.9, 63.3; 848.9, 97.2; 888.3, 119.6;  
1583.3, 155.8; 1585.2, 164.5; 1606.3, 92.6; 1611.1,  
41.9; 1615.7, 32.4; 1625.8, 167.7; 1638.7, 45.8; 641.7,  
45.9; 1652.2, 73.0; 1653.3, 15.2; 1671.9, 9.9; 3515.8,  
487.5; 562.2, 989.9; 3579.6, 236.0; 3619.2, 497.3;  
3644.4, 138.8; 3654.9, 147.1; 3679.5, 169.2; 3698.3,  
475.8; 3712.3, 207.2; 3726.6, 351.3; 3750.7, 285.9;  
780.3, 788.1; 3808.3, 582.6; 3846.4, 227.4; 3901.2,  
116.7; 3915.1, 80.2; 3915.9, 152.8; 3928.6, 116.7;  
3935.4, 152.6; 3937.2, 161.0; 3941.5, 175.2; 3945.2,  
147.1;

-2223.289876850 -2223.005984 -2222.976895 -  
2223.061174

[Co(H<sub>2</sub>O)<sub>12</sub>]<sup>+</sup>

Co 0.174562 0.135306 -0.053362  
O 0.355439 -2.090727 -0.507244  
H -0.469603 -2.320738 -0.970340  
O -2.729397 2.160361 -0.121508  
H -3.274408 2.949628 -0.173722  
O -0.217453 2.211049 0.936704  
H 0.653395 2.647241 0.909052  
O -1.196150 0.549684 -1.775413  
H -1.892386 1.170994 -1.505380  
O -0.881913 -0.300250 1.867145  
H -0.459213 -1.071421 2.282492  
O 2.229752 -0.174893 1.040940  
H 2.039865 -0.819745 1.742802  
H -1.880089 2.415442 0.295064  
H -1.643739 -0.283112 -1.998125  
H -0.287756 1.754476 1.786887  
H -1.810519 -0.525680 1.692486  
H 2.672197 -0.687156 0.339543  
H 1.111914 -2.176031 -1.111937  
O -3.394344 -0.428899 0.644761  
H -3.310464 0.517263 0.403007  
H -4.259977 -0.532866 1.049426  
O -2.280265 -1.994739 -1.405619  
H -2.875190 -2.602431 -1.852333  
H -2.777127 -1.600298 -0.661774  
O 1.549600 1.014341 -1.724749  
H 1.915415 1.803537 -1.290607  
H 0.807514 1.281705 -2.282147  
O 0.909123 -2.367532 2.176586  
H 1.074316 -3.179319 2.661419  
H 0.720613 -2.599692 1.246734  
O 2.483325 2.502332 0.468662  
H 2.645402 1.627816 0.873370  
H 3.218652 3.074234 0.702714  
O 2.825548 -1.367842 -1.462121  
H 3.592281 -1.681987 -1.947387  
H 2.549622 -0.518207 -1.855615

---  
54.2, 0.7; 68.0, 0.9; 70.5, 1.8; 75.8, 0.9; 84.6, 1.5;  
90.0, 2.2; 97.8, 2.2; 109.6, 4.6; 113.9, 1.2; 120.0,  
4.5; 123.7, 1.6; 138.9, 11.1; 141.5, 1.0; 150.7, 3.3;  
158.5, 1.3; 168.5, 5.2; 186.3, 1.3; 191.7, 3.9; 194.6,  
12.3; 205.4, 12.4; 210.1, 20.6; 215.9, 7.7; 229.6, 1.9;  
236.4, 29.4; 250.2, 19.4; 256.5, 18.3; 263.5, 5.6;  
271.2, 11.9; 273.1, 20.6; 274.3, 20.7; 279.4, 1.7;  
294.5, 11.4; 300.4, 18.3; 335.7, 6.6; 354.4, 11.8;  
372.9, 30.3; 380.1, 18.0; 387.6, 4.3; 398.7, 27.4;  
414.1, 22.3; 416.7, 105.6; 419.7, 48.6; 431.5, 34.9;  
448.2, 108.4; 466.0, 112.0; 480.3, 37.3; 483.2, 62.4;  
508.5, 85.0; 521.3, 179.2; 541.1, 53.5; 560.4, 164.6;  
575.4, 47.3; 583.5, 155.0; 631.6, 292.5; 644.5, 495.6;  
677.0, 731.4; 693.1, 99.2; 696.8, 163.1; 715.6, 134.3;  
749.6, 80.8; 757.0, 188.9; 768.7, 46.1; 788.3, 96.9;  
798.2, 119.5; 805.7, 209.5; 817.4, 32.9; 848.2, 54.5;  
873.0, 122.4; 887.2, 57.3; 1559.0, 103.5; 1574.7,  
164.9; 1592.0, 150.3; 1605.4, 23.9; 1609.8, 86.9;  
1614.5, 158.5; 1620.4, 24.5; 1626.9, 53.9; 1642.4,  
27.2; 1647.8, 28.5; 1663.0, 7.9; 1674.9, 66.8; 3541.2,  
455.6; 3588.8, 592.4; 3599.4, 174.6; 3609.1, 39.6;  
3625.3, 450.2; 3634.9, 467.8; 3663.4, 95.0; 3673.7,  
81.0; 3674.7, 311.0; 3687.4, 268.1; 3703.5, 441.2;  
3716.7, 120.4; 3738.4, 205.5; 3757.1, 1481.4; 3769.0,  
647.8; 3776.9, 609.9; 3825.8, 273.4; 3858.1, 307.8;  
3927.1, 115.5; 3935.9, 149.7; 3936.8, 180.8; 3938.4,  
142.1; 3942.8, 140.4; 3948.7, 162.8;

-2299.738068210 -2299.426791 -2299.396198 -  
2299.483032

[Co(H<sub>2</sub>O)<sub>13</sub>]<sup>+</sup>

|    |           |           |           |
|----|-----------|-----------|-----------|
| Co | -0.146889 | 0.011756  | -0.203651 |
| O  | -0.205652 | 2.263828  | 0.254942  |
| H  | 0.628313  | 2.629689  | -0.087445 |
| O  | 2.609304  | -1.907881 | -1.152887 |
| H  | 3.101932  | -2.644325 | -1.523207 |
| O  | 0.015775  | -2.267466 | -0.438021 |
| H  | -0.814870 | -2.515830 | -0.876028 |
| O  | 1.208053  | 0.325644  | -1.978811 |
| H  | 1.869224  | -0.384774 | -2.014727 |
| O  | 0.964383  | -0.225961 | 1.781710  |
| H  | 0.590362  | 0.459254  | 2.366986  |
| O  | -2.172680 | -0.071792 | 0.902052  |
| H  | -1.995901 | 0.096894  | 1.839210  |
| H  | 1.711124  | -2.236668 | -0.924743 |
| H  | 1.699663  | 1.152478  | -1.844933 |
| H  | -0.099682 | -2.574355 | 0.489687  |
| H  | 1.903277  | -0.027275 | 1.624785  |
| H  | -2.581184 | 0.745906  | 0.563902  |
| H  | -0.961055 | 2.626205  | -0.239194 |
| O  | 3.443226  | 0.108668  | 0.561065  |
| H  | 3.269329  | -0.656342 | -0.028895 |
| O  | 4.321547  | -0.022448 | 0.928652  |
| H  | 2.434601  | 2.440513  | -0.635766 |
| H  | 3.057076  | 3.150320  | -0.812757 |
| H  | 2.916289  | 1.751486  | -0.137499 |
| O  | -1.547951 | 0.170117  | -2.114563 |
| H  | -2.011394 | -0.685032 | -2.118057 |
| H  | -0.790720 | 0.124971  | -2.712766 |
| O  | -2.697314 | -2.058611 | -0.979164 |
| H  | -2.728475 | -1.551421 | -0.145021 |
| H  | -3.478847 | -2.615220 | -1.011911 |
| O  | -2.728619 | 2.172044  | -0.755691 |
| H  | -3.481259 | 2.702684  | -1.026881 |
| H  | -2.490318 | 1.583681  | -1.498612 |
| O  | -0.786895 | 1.564616  | 2.829729  |
| H  | -0.921518 | 2.143186  | 3.583504  |
| H  | -0.643078 | 2.121733  | 2.040895  |
| O  | -0.315392 | -2.590153 | 2.203065  |
| H  | -0.136558 | -3.253223 | 2.872351  |
| H  | 0.266014  | -1.827499 | 2.369990  |

---  
51.0, 0.4; 55.3, 0.4; 62.1, 0.5; 71.9, 0.3; 73.6, 0.6;  
84.8, 0.6; 86.6, 0.4; 98.4, 2.0; 106.6, 3.4; 111.1,  
0.8; 115.3, 3.1; 119.9, 2.5; 129.4, 6.2; 137.9, 0.9;  
146.5, 1.1; 159.6, 5.1; 164.0, 3.2; 174.2, 10.9; 192.4,  
2.3; 195.1, 11.5; 200.5, 5.6; 211.5, 15.9; 217.5, 9.7;  
220.8, 18.8; 233.2, 22.7; 241.5, 4.9; 251.7, 4.3;  
255.0, 9.4; 262.3, 10.2; 271.0, 6.3; 275.5, 48.3;  
281.2, 1.3; 282.4, 18.4; 288.4, 3.8; 290.5, 30.0;  
314.8, 103.1; 325.8, 24.8; 341.0, 2.2; 344.4, 10.0;  
349.6, 10.8; 358.0, 53.1; 372.6, 73.6; 379.7, 18.6;  
399.2, 38.6; 407.0, 70.1; 423.2, 49.0; 432.8, 35.4;  
435.1, 63.5; 452.3, 61.5; 472.4, 209.3; 487.1, 100.2;  
492.8, 64.1; 504.4, 5.1; 534.5, 101.8; 545.3, 211.6;  
563.6, 85.1; 586.8, 43.6; 624.0, 331.2; 635.4, 364.8;  
659.0, 110.6; 694.7, 602.8; 705.4, 117.7; 717.1, 300.5;  
732.5, 99.9; 761.7, 247.3; 773.5, 66.4; 785.1, 15.4;  
787.1, 55.9; 794.0, 169.2; 804.1, 107.7; 830.3, 52.5;  
877.5, 37.2; 884.5, 126.4; 917.7, 96.6; 924.4, 131.4;  
1555.1, 97.7; 1562.7, 156.3; 1572.5, 117.5; 1600.0,  
11.8; 1603.8, 121.7; 1613.3, 125.2; 1615.0, 19.5;  
1617.0, 144.2; 1620.9, 27.9; 1650.7, 35.2; 1657.7,  
68.7; 1667.3, 1.4; 1695.4, 61.4; 3463.2, 707.8; 3521.7,  
574.5; 3555.0, 353.6; 3595.9, 276.2; 3604.3, 138.5;  
3611.3, 293.5; 3637.0, 609.5; 3643.5, 504.9; 3670.5,  
109.0; 3682.0, 281.4; 3692.5, 478.1; 3701.5, 263.9;  
3707.7, 41.6; 3731.3, 634.5; 3748.8, 325.4; 3756.0,  
1232.8; 3778.2, 628.8; 3816.9, 336.2; 3853.7, 334.6;  
3927.1, 106.3; 3936.9, 152.3; 3937.7, 147.9; 3945.5,  
151.8; 3946.5, 152.7; 3950.9, 157.1; 3961.5, 171.3;

-2376.178026860 -2375.840955 -2375.807807 -  
2375.900222

[Co(H<sub>2</sub>O)<sub>14</sub>]<sup>+</sup>

|    |           |           |          |
|----|-----------|-----------|----------|
| Co | -0.040396 | -0.123574 | 0.332013 |
| O  | -0.282418 | 2.079214  | 0.914343 |
| H  | -1.236460 | 2.178317  | 1.079491 |

|   |           |           |           |
|---|-----------|-----------|-----------|
| O | -2.552381 | -2.398347 | -0.673609 |
| H | -2.922194 | -3.268231 | -0.841110 |
| O | 0.140066  | -2.188113 | -0.579638 |
| H | 0.779695  | -2.651635 | -0.012115 |
| O | -1.961667 | -0.729652 | 1.444502  |
| H | -2.427201 | -1.412660 | 0.933772  |
| O | -0.616686 | 0.451544  | -1.739854 |
| H | -0.336874 | 1.352852  | -1.959865 |
| O | 2.245957  | 0.184550  | 0.300780  |
| H | 2.596564  | 0.569337  | -0.524106 |
| H | -1.572412 | -2.472554 | -0.748112 |
| H | -2.551218 | 0.039943  | 1.496602  |
| H | 0.657051  | -1.959712 | -1.385473 |
| H | -1.579253 | 0.430904  | -1.861428 |
| H | 2.377005  | 0.831807  | 1.014015  |
| H | 0.221307  | 2.188820  | 1.741119  |
| O | -3.395420 | 0.097535  | -1.457854 |
| H | -3.235583 | -0.849326 | -1.255693 |
| H | -4.080543 | 0.125781  | -2.130545 |
| O | -3.066617 | 1.736378  | 0.794051  |
| H | -3.826541 | 2.269705  | 1.040063  |
| H | -3.278470 | 1.314268  | -0.061992 |
| O | 0.526025  | -0.844625 | 2.569822  |
| H | 1.055987  | -1.640086 | 2.391640  |
| H | -0.404222 | -1.100936 | 2.649498  |
| O | 2.626447  | 1.232066  | -2.220219 |
| H | 3.401544  | 1.586087  | -2.662803 |
| H | 1.993638  | 1.969198  | -2.105569 |
| O | 2.276525  | -2.449370 | 1.169652  |
| H | 2.558714  | -1.597352 | 0.781764  |
| H | 3.055239  | -3.002374 | 1.264203  |
| O | 1.690792  | 1.576402  | 2.721901  |
| H | 2.144204  | 1.937071  | 3.487105  |
| H | 1.325842  | 0.703376  | 2.972247  |
| O | 0.618510  | 2.952628  | -1.504223 |
| H | 0.464366  | 3.875054  | -1.719510 |
| H | 0.346441  | 2.815001  | -0.570577 |
| O | 1.935400  | -1.508865 | -2.492649 |
| H | 2.028497  | -1.878147 | -3.372878 |
| H | 2.059297  | -0.548777 | -2.580134 |

---  
43.5, 0.6; 58.0, 0.5; 65.9, 0.8; 70.7, 1.0; 74.7, 0.2;  
77.6, 2.6; 87.2, 0.3; 87.8, 2.0; 90.2, 2.6; 96.0, 5.1;  
100.6, 5.0; 111.1, 0.2; 114.6, 2.0; 120.0, 0.4; 125.2,  
3.6; 139.2, 1.7; 153.3, 8.7; 165.7, 4.2; 170.7, 3.3;  
181.7, 8.3; 186.6, 6.6; 194.6, 6.8; 200.9, 4.7; 211.3,  
18.6; 216.8, 12.5; 218.9, 14.6; 224.7, 13.9; 231.6,  
62.3; 239.5, 43.5; 242.5, 22.7; 255.4, 10.9; 258.0,  
16.7; 264.1, 4.9; 276.7, 24.6; 280.0, 5.4; 283.0, 19.5;  
292.0, 20.8; 301.8, 13.0; 304.4, 5.2; 327.8, 21.7;  
333.6, 24.9; 336.8, 7.6; 338.8, 5.8; 350.4, 49.5;  
356.9, 6.7; 367.6, 43.8; 394.7, 25.7; 411.1, 27.8;  
425.4, 31.1; 434.5, 30.6; 436.1, 155.0; 463.4, 93.2;  
470.6, 28.2; 481.4, 35.7; 487.8, 107.8; 496.2, 119.1;  
509.2, 120.4; 521.7, 143.0; 547.8, 81.8; 559.5, 48.0;  
563.3, 41.3; 594.7, 46.4; 628.4, 151.6; 634.6, 88.3;  
651.0, 461.5; 659.0, 594.5; 704.6, 311.4; 715.7, 113.8;  
722.6, 173.9; 730.7, 90.1; 758.1, 279.2; 771.0, 84.2;  
794.9, 131.3; 797.7, 51.7; 808.6, 91.8; 826.0, 65.5;  
860.3, 147.3; 879.4, 43.4; 900.4, 110.6; 930.6, 101.3;  
976.8, 161.6; 1559.2, 117.0; 1581.9, 82.7; 1595.5,  
121.6; 1612.9, 44.0; 1613.1, 129.9; 1614.1, 128.6;  
1620.4, 53.9; 1631.3, 52.4; 1634.5, 33.9; 1644.7, 41.4;  
1657.5, 28.0; 1660.8, 15.1; 1676.9, 47.2; 1687.9, 86.0;  
3441.2, 984.7; 3507.3, 421.8; 3519.6, 615.2; 3548.4,  
374.3; 3577.3, 72.8; 3592.3, 1047.9; 3613.7, 280.0;  
3615.5, 363.9; 3651.6, 265.6; 3658.4, 64.2; 3691.1,  
190.2; 3695.6, 68.9; 3717.2, 786.0; 3719.6, 321.4;  
3726.8, 54.2; 3734.7, 822.2; 3755.7, 970.1; 3778.0,  
652.1; 3797.7, 712.3; 3815.7, 462.5; 3934.5, 106.8;  
3938.6, 157.3; 3941.8, 127.5; 3943.5, 153.9; 3946.9,  
121.6; 3948.2, 246.8; 3949.3, 74.5; 3961.1, 151.9;

-2452.619393980 -2452.256509 -2452.220735 -  
2452.318837

[Co(H<sub>2</sub>O)<sub>15</sub>]<sup>+</sup>

|    |           |           |           |
|----|-----------|-----------|-----------|
| Co | -0.121030 | 0.252863  | -0.059331 |
| O  | -0.014888 | -0.438466 | -2.254196 |
| H  | -0.881330 | -0.832018 | -2.442148 |
| O  | -2.313651 | -0.864748 | 2.459260  |
| H  | -2.808047 | -0.719028 | 3.269194  |
| O  | 0.006511  | 0.481515  | 2.194687  |





-2605.495281350 -2605.081281 -2605.040209 -  
2605.150471

[Co(H<sub>2</sub>O)<sub>17</sub>]<sup>+</sup>

|    |           |           |           |
|----|-----------|-----------|-----------|
| Co | -0.780996 | -0.110496 | -0.156303 |
| O  | 0.017306  | 0.818727  | -2.090264 |
| H  | 0.562374  | 0.144863  | -2.530259 |
| O  | 0.191923  | -2.940708 | 1.850807  |
| H  | -0.137921 | -3.760265 | 2.226865  |
| O  | -1.256948 | -0.690232 | 2.027670  |
| H  | -2.186866 | -0.426632 | 2.140389  |
| O  | -0.195464 | -2.247343 | -0.828321 |
| H  | 0.130037  | -2.647305 | -0.002976 |
| O  | 1.363352  | 0.078332  | 0.403077  |
| H  | 1.615511  | 0.992283  | 0.181784  |
| O  | -1.685750 | 2.038796  | 0.286488  |
| H  | -1.029622 | 2.673202  | 0.629894  |
| H  | -0.472709 | -2.239383 | 2.041000  |
| H  | 0.573901  | -2.084456 | -1.403239 |
| H  | -0.721581 | -0.011741 | 2.490351  |
| H  | 1.632893  | -0.075317 | 1.320452  |
| H  | -1.917489 | 2.304209  | -0.620754 |
| H  | -0.740099 | 1.072012  | -2.643081 |
| O  | 2.625076  | -1.688599 | 2.129295  |
| H  | 1.829231  | -2.257533 | 2.143521  |
| H  | 3.055333  | -1.784129 | 2.981318  |
| O  | 3.878027  | -1.305104 | -0.346930 |
| H  | 4.568744  | -1.971224 | -0.387747 |
| H  | 3.439026  | -1.422643 | 0.521474  |
| O  | -2.953354 | -0.408867 | -0.842349 |
| H  | -3.495428 | -0.256368 | -0.050711 |
| H  | -3.067686 | -1.348488 | -1.105799 |
| O  | 0.486947  | 3.413788  | 1.342881  |
| H  | 0.563217  | 4.338094  | 1.591171  |
| H  | 1.084493  | 3.265786  | 0.573185  |
| O  | -3.630547 | 0.675888  | 1.618539  |
| H  | -3.077592 | 1.406780  | 1.274386  |
| H  | -4.381583 | 1.055563  | 2.079125  |
| O  | -2.518654 | 1.750849  | -2.395329 |
| H  | -3.162200 | 2.131982  | -2.996102 |
| H  | -2.909374 | 0.938721  | -2.008190 |
| O  | 1.773096  | 2.547594  | -0.813543 |
| H  | 2.684006  | 2.312422  | -1.079266 |
| H  | 1.170854  | 2.130992  | -1.458141 |
| O  | 0.481750  | 1.180729  | 3.040045  |
| H  | 0.637240  | 1.402225  | 3.960571  |
| H  | 0.516272  | 2.020304  | 2.542517  |
| H  | 4.202852  | 0.447387  | -0.880455 |
| H  | 5.048766  | 1.615146  | -1.466721 |
| O  | 4.150997  | 1.325690  | -1.296347 |
| O  | -2.745209 | -3.017236 | -1.397717 |
| H  | -2.987893 | -3.631377 | -2.091892 |
| H  | -1.771769 | -2.975544 | -1.353260 |
| O  | 1.883174  | -1.239492 | -2.385115 |
| H  | 2.550437  | -1.127047 | -1.679063 |
| H  | 2.355764  | -1.591615 | -3.143250 |

---  
34.0, 1.0; 35.3, 2.4; 44.5, 2.1; 49.5, 0.5; 53.3, 0.3;  
58.9, 1.1; 64.7, 0.8; 68.2, 0.8; 74.4, 1.7; 76.4, 1.4;  
81.7, 0.2; 85.2, 0.9; 92.6, 0.8; 95.9, 0.9; 110.0, 2.2;  
110.7, 0.8; 120.3, 4.0; 127.9, 3.5; 132.3, 0.9; 146.1,  
1.6; 151.8, 7.9; 153.3, 1.2; 162.6, 5.6; 171.3, 10.6;  
172.4, 5.7; 182.3, 52.0; 188.2, 62.1; 189.4, 7.8;  
195.5, 5.9; 201.7, 2.3; 203.4, 12.7; 213.4, 2.7; 220.8,  
12.0; 226.8, 5.2; 234.2, 7.1; 236.7, 26.8; 245.8, 30.5;  
249.1, 25.4; 257.2, 81.6; 261.3, 64.8; 265.5, 26.0;  
268.6, 14.4; 274.9, 8.6; 279.9, 14.8; 281.7, 37.7;  
291.5, 18.7; 301.7, 10.5; 306.9, 5.1; 322.1, 2.1;  
327.5, 1.3; 334.1, 15.9; 336.3, 13.8; 348.1, 18.5;  
351.1, 23.0; 362.4, 4.5; 363.3, 72.3; 368.6, 2.6;  
371.5, 66.1; 386.9, 26.5; 417.9, 25.6; 424.9, 111.7;  
433.0, 2.4; 449.5, 106.0; 450.8, 105.5; 461.3, 116.1;  
469.6, 180.1; 479.3, 39.6; 502.9, 16.4; 512.6, 56.9;  
523.5, 231.5; 526.5, 295.4; 544.8, 72.3; 576.4, 31.8;  
584.9, 122.3; 587.1, 19.3; 612.3, 82.2; 635.0, 118.8;  
649.3, 187.2; 667.0, 7.6; 670.5, 375.9; 685.0, 78.9;  
705.3, 428.6; 732.7, 203.0; 743.9, 200.7; 750.2, 89.3;  
764.9, 242.0; 791.1, 224.6; 806.0, 24.5; 810.0, 207.7;  
814.8, 70.7; 827.2, 45.4; 840.5, 54.5; 850.8, 206.0;  
870.2, 169.5; 891.3, 88.2; 909.5, 11.8; 931.5, 96.9;  
939.4, 306.4; 950.1, 13.2; 1547.2, 85.2; 1575.4, 68.9;  
1586.6, 170.0; 1597.7, 58.9; 1607.8, 179.6; 1610.7,

34.0; 1615.0, 14.2; 1620.3, 154.5; 1626.8, 136.2;  
1633.6, 53.6; 1635.1, 32.1; 1641.0, 20.6; 1646.2, 10.7;  
1651.6, 5.0; 1658.4, 56.6; 1663.0, 56.9; 1674.7, 19.8;  
3446.8, 407.2; 3465.3, 1068.6; 3494.7, 1026.6; 3553.6,  
144.8; 3555.8, 370.8; 3561.5, 283.3; 3584.6, 408.5;  
3587.5, 355.1; 3603.1, 1199.2; 3616.2, 199.9; 3630.7,  
498.1; 3632.2, 513.0; 3653.9, 398.1; 3660.8, 335.4;  
3678.8, 227.6; 3687.4, 345.0; 3693.7, 112.8; 3706.5,  
502.2; 3710.8, 274.6; 3721.8, 689.0; 3733.0, 1324.2;  
3747.9, 606.7; 3785.8, 804.2; 3808.5, 513.2; 3935.3,  
75.3; 3940.5, 135.8; 3941.1, 224.5; 3941.8, 54.3;  
3951.5, 81.8; 3951.9, 150.3; 3954.0, 185.1; 3955.3,  
140.2; 3966.3, 167.8; 3971.3, 151.1;

-2681.935849390 -2681.495852 -2681.452298 -  
2681.568215

$\eta^1$ -NL [CoN<sub>2</sub>O]<sup>+</sup>

structure from Co-N20-7.log

|    |           |           |          |
|----|-----------|-----------|----------|
| Co | -0.000536 | -1.397964 | 0.000000 |
| N  | 0.000000  | 0.529677  | 0.000000 |
| N  | 0.000704  | 1.655650  | 0.000000 |
| O  | 0.001194  | 2.805969  | 0.000000 |

187.8, 0.3; 302.9, 1.3; 545.0, 4.9; 593.1, 6.5;  
1468.5, 92.7; 2509.0, 581.8;

-1566.984777610 -1566.972005 -1566.966870 -  
1566.993234

$\eta^1$ -NL [Co(H<sub>2</sub>O)<sub>1</sub>N<sub>2</sub>O]<sup>+</sup>

|    |           |           |           |
|----|-----------|-----------|-----------|
| Co | -0.805008 | -0.000074 | -0.058488 |
| N  | 2.224940  | -0.000021 | 0.029552  |
| N  | 1.099268  | -0.000240 | 0.036588  |
| O  | 3.376252  | 0.000229  | 0.023558  |
| O  | -2.740970 | 0.000184  | 0.092518  |
| H  | -3.308135 | 0.780626  | 0.093621  |
| H  | -3.308364 | -0.780091 | 0.093981  |

---  
61.6, 4.4; 88.9, 4.6; 150.9, 0.5; 188.7, 0.8; 288.8,  
3.3; 334.0, 287.1; 457.3, 1.0; 586.0, 7.6; 607.3, 9.2;  
621.0, 65.8; 1456.6, 175.5; 1646.2, 110.8; 2503.1,  
639.4; 3822.3, 190.3; 3910.7, 286.7;

-1643.469923220 -1643.431825 -1643.423708 -  
1643.463866

$\eta^1$ -NL [Co(H<sub>2</sub>O)<sub>2</sub>N<sub>2</sub>O]<sup>+</sup>

|    |           |           |           |
|----|-----------|-----------|-----------|
| Co | 0.900182  | 0.000045  | -0.000034 |
| O  | 1.287000  | -1.969169 | -0.000054 |
| H  | 0.622744  | -2.666374 | -0.000015 |
| O  | 1.286050  | 1.969502  | -0.000088 |
| H  | 0.621492  | 2.666417  | 0.000832  |
| H  | 2.152464  | -2.391538 | 0.001396  |
| H  | 2.151329  | 2.392251  | 0.000680  |
| N  | -2.229375 | -0.000204 | -0.000041 |
| N  | -1.102599 | 0.000056  | -0.000323 |
| O  | -3.389190 | -0.000449 | 0.000214  |

---  
50.3, 0.2; 68.1, 13.3; 100.6, 16.4; 108.7, 2.6; 119.9,  
2.3; 184.3, 1.3; 190.2, 0.0; 206.1, 2.5; 293.1, 0.0;  
322.6, 0.8; 324.3, 529.7; 410.5, 14.0; 542.5, 2.3;  
573.6, 107.8; 576.2, 8.3; 585.0, 9.2; 1412.4, 216.7;  
1639.0, 192.6; 1639.7, 11.0; 2463.0, 468.8; 3842.3,  
235.5; 3844.6, 23.2; 3937.6, 9.5; 3938.5, 470.4;

-1719.927881560 -1719.865520 -1719.854014 -  
1719.903455

$\eta^1$ -NL [Co(H<sub>2</sub>O)<sub>3</sub>N<sub>2</sub>O]<sup>+</sup>

|    |           |           |           |
|----|-----------|-----------|-----------|
| Co | 0.547615  | 0.000143  | 0.000207  |
| O  | 0.702016  | -2.076490 | 0.000025  |
| O  | 0.715247  | 2.074081  | 0.000262  |
| O  | 2.714981  | -0.001451 | -0.000007 |
| H  | 3.283896  | -0.014472 | 0.775817  |
| H  | 3.286318  | -0.010396 | -0.774191 |
| H  | 1.534451  | -2.558583 | -0.006064 |
| H  | -0.009914 | -2.723970 | 0.003277  |
| H  | 1.553650  | 2.545485  | -0.003475 |
| H  | 0.010533  | 2.729012  | 0.000552  |
| N  | -2.549176 | 0.002315  | -0.000337 |
| N  | -1.421622 | 0.001512  | -0.000274 |

O -3.713363 0.004143 0.000068 -1949.273394470 -1949.134264 -1949.114729 -  
--- 1949.183495

24.9, 0.8; 52.3, 0.3; 75.6, 7.3; 87.4, 52.8; 131.0,  
9.6; 160.9, 5.0; 163.7, 0.7; 179.0, 1.6; 185.3, 8.9;  
262.5, 184.4; 264.1, 8.4; 271.1, 2.4; 277.8, 5.3;  
303.0, 422.4; 312.6, 0.7; 353.4, 62.1; 355.2, 0.3;  
459.4, 113.2; 490.9, 8.6; 517.4, 117.5; 564.3, 7.3;  
567.6, 5.8; 1391.8, 302.7; 1616.5, 87.6; 1622.7, 178.4;  
1625.6, 43.2; 2449.2, 391.8; 3850.2, 80.5; 3850.8,  
107.5; 3853.0, 49.1; 956.4, 133.1; 3956.6, 197.2;  
3959.4, 221.1;

-1796.380937850 -1796.293931 -1796.279343 -  
1796.335621

$\eta^1$ -NL [Co(H<sub>2</sub>O)<sub>4</sub>N<sub>2</sub>O]<sup>+</sup>

|    |           |           |           |
|----|-----------|-----------|-----------|
| Co | 0.029525  | 0.313016  | -0.101842 |
| O  | 3.644808  | -1.151625 | 0.221061  |
| H  | 4.235729  | -1.584082 | -0.405170 |
| O  | -0.333840 | 2.306717  | 0.436957  |
| H  | 0.400706  | 2.875702  | 0.687768  |
| O  | 1.993848  | 1.031748  | -0.477798 |
| H  | 2.731224  | 0.420784  | -0.301589 |
| O  | 0.880654  | -1.576411 | 0.142242  |
| H  | 0.440709  | -2.393982 | 0.387885  |
| H  | 4.126978  | -1.119125 | 1.054699  |
| H  | 1.840831  | -1.695821 | 0.240042  |
| H  | -1.144833 | 2.718951  | 0.748396  |
| H  | 2.189493  | 1.478676  | -1.306491 |
| N  | -2.896839 | -0.618408 | -0.042355 |
| N  | -1.822242 | -0.276578 | -0.064220 |
| O  | -4.008524 | -0.971383 | -0.023685 |

---  
28.6, 0.5; 39.0, 3.2; 47.9, 2.1; 73.4, 0.9; 112.0, 5.8;  
132.0, 0.7; 151.5, 1.5; 174.5, 7.2; 188.8, 3.2; 216.9,  
10.1; 229.5, 30.5; 236.1, 46.7; 260.7, 25.0; 277.5,  
67.1; 286.5, 15.5; 290.0, 131.0; 321.2, 53.2; 338.6,  
6.9; 347.6, 9.7; 385.3, 123.9; 457.8, 151.3; 489.8,  
36.2; 542.5, 7.0; 553.9, 9.2; 577.3, 85.3; 590.3,  
219.0; 697.8, 133.6; 740.1, 163.8; 1382.5, 362.0;  
1610.3, 148.2; 1614.7, 90.3; 1624.4, 105.8; 1658.3,  
15.8; 2444.8, 360.8; 3664.7, 123.9; 3704.3, 1022.1;  
3843.1, 40.1; 3850.5, 72.6; 3919.3, 198.4; 3935.9,  
158.6; 3942.3, 183.6; 3959.6, 175.4;

-1872.828496790 -1872.714721 -1872.698128 -  
1872.759128

$\eta^1$ -NL [Co(H<sub>2</sub>O)<sub>5</sub>N<sub>2</sub>O]<sup>+</sup>

|    |           |           |           |
|----|-----------|-----------|-----------|
| Co | 0.174251  | -0.000038 | -0.002352 |
| O  | -2.749136 | 2.700990  | 0.003928  |
| H  | -3.166256 | 3.107520  | 0.770820  |
| O  | -0.012126 | 2.093831  | 0.000358  |
| H  | -0.877978 | 2.536638  | -0.000337 |
| O  | -1.909026 | -0.000356 | -0.008370 |
| H  | -2.460260 | -0.796647 | 0.005697  |
| O  | -0.010754 | -2.093808 | -0.005334 |
| H  | 0.678897  | -2.761404 | -0.008480 |
| H  | -3.169266 | 3.098761  | -0.765927 |
| H  | -0.876295 | -2.537254 | -0.004042 |
| H  | 0.677043  | 2.761925  | -0.001652 |
| H  | -2.461318 | 0.795206  | 0.003891  |
| O  | -2.747233 | -2.701899 | 0.007958  |
| H  | -3.161779 | -3.107527 | 0.776727  |
| H  | -3.169692 | -3.100847 | -0.760020 |
| N  | 3.238814  | 0.000611  | 0.002531  |
| O  | 4.407891  | 0.000816  | 0.004748  |
| N  | 2.110500  | 0.000541  | 0.000400  |

---  
20.1, 20.7; 27.8, 0.5; 33.5, 0.0; 43.1, 0.0; 83.6, 1.8;  
89.9, 2.9; 134.2, 0.6; 147.7, 0.7; 160.1, 0.1; 163.0,  
11.6; 185.2, 7.5; 203.8, 0.0; 206.9, 0.3; 207.5, 0.6;  
221.3, 122.6; 243.1, 31.0; 249.0, 0.0; 278.9, 123.4;  
280.9, 0.0; 290.0, 11.0; 290.4, 0.1; 337.7, 21.5;  
359.4, 3.8; 429.3, 154.1; 455.4, 154.8; 528.1, 8.4;  
545.3, 5.8; 564.0, 104.7; 574.6, 82.5; 613.9, 2.6;  
615.9, 241.9; 702.3, 410.3; 717.9, 5.1; 734.2, 170.8;  
1371.3, 409.7; 1595.7, 92.9; 1608.7, 223.9; 1610.0,  
60.9; 1640.5, 16.6; 1666.6, 4.8; 2436.7, 322.9; 3686.1,  
449.1; 3687.3, 95.3; 3730.9, 780.3; 3809.6, 977.0;  
3848.8, 41.7; 3853.9, 24.5; 3942.7, 36.4; 3943.2,  
297.6; 3950.6, 3.2; 3951.0, 341.6;

$\eta^1$ -NL [Co(H<sub>2</sub>O)<sub>6</sub>N<sub>2</sub>O]<sup>+</sup>

|    |           |           |           |
|----|-----------|-----------|-----------|
| Co | 0.018494  | 0.218131  | -0.005730 |
| O  | -0.053861 | 1.557362  | -1.858244 |
| H  | 0.553776  | 2.238591  | -2.161087 |
| O  | -0.765798 | -1.170993 | -1.579513 |
| H  | -1.615992 | -1.511250 | -1.245144 |
| O  | -0.043890 | 1.679369  | 1.751257  |
| H  | -0.138038 | 1.104100  | 2.519692  |
| O  | -0.765402 | -1.064149 | 1.654544  |
| H  | -1.615206 | -1.426495 | 1.343489  |
| O  | -2.113016 | 1.094151  | -0.035257 |
| H  | -2.005733 | 1.644928  | -0.822616 |
| H  | -2.014630 | 1.694061  | 0.716253  |
| H  | -0.268312 | -1.804511 | 2.012587  |
| H  | 0.565791  | 2.380149  | 2.000632  |
| H  | -0.268655 | -1.933964 | -1.886397 |
| H  | -0.151781 | 0.927523  | -2.582284 |
| O  | -3.005569 | -1.477829 | 0.048245  |
| H  | -3.168598 | -0.520152 | 0.016750  |
| H  | -3.857137 | -1.923269 | 0.061543  |
| N  | 3.001494  | -0.517220 | 0.014724  |
| N  | 1.896400  | -0.280095 | 0.008396  |
| O  | 4.147527  | -0.765168 | 0.021398  |

---  
33.8, 0.7; 40.2, 0.4; 54.8, 0.2; 70.3, 6.4; 95.8, 3.9;  
110.5, 1.4; 112.2, 1.6; 117.1, 5.2; 126.5, 12.2; 144.8,  
3.1; 174.3, 0.5; 176.1, 0.8; 185.8, 0.1; 194.3, 0.7;  
220.9, 10.8; 236.3, 0.3; 252.4, 12.4; 253.2, 15.4;  
258.4, 7.8; 260.4, 6.5; 290.4, 0.1; 335.7, 191.7;  
339.4, 78.3; 361.6, 205.6; 375.7, 29.9; 404.8, 88.8;  
410.5, 22.1; 413.7, 54.1; 425.8, 101.1; 442.4, 0.4;  
481.1, 50.4; 493.8, 10.4; 513.3, 4.0; 518.3, 15.6;  
522.2, 41.1; 542.8, 356.8; 579.4, 480.0; 654.3, 267.0;  
755.6, 224.1; 760.7, 14.3; 1352.3, 428.1; 1572.8,  
135.1; 1592.6, 161.3; 1598.0, 39.3; 1632.5, 0.7;  
1641.4, 7.1; 1653.6, 221.7; 2415.3, 279.5; 3644.3,  
189.4; 3668.5, 427.9; 3732.8, 525.0; 3784.8, 32.2;  
3828.1, 136.9; 3831.2, 22.2; 3876.8, 174.4; 3925.7,  
69.9; 3928.7, 223.5; 3938.2, 205.0; 3946.5, 61.3;  
3948.0, 259.5;

-2025.717031670 -2025.552431 -2025.530671 -  
2025.601686

$\eta^1$ -NL [Co(H<sub>2</sub>O)<sub>5</sub>N<sub>2</sub>O]<sup>+</sup>

|    |           |           |           |
|----|-----------|-----------|-----------|
| Co | -0.169506 | -0.071097 | 0.000794  |
| O  | -1.399786 | -0.981157 | 1.601558  |
| H  | -2.316256 | -1.056332 | 1.280737  |
| O  | 0.494847  | 1.461359  | 1.519785  |
| H  | 1.321777  | 1.908200  | 1.275574  |
| O  | -1.397855 | -0.978809 | -1.602064 |
| H  | -1.183820 | -1.810428 | -2.031499 |
| O  | 0.490104  | 1.465304  | -1.517554 |
| H  | 1.317108  | 1.912038  | -1.273256 |
| O  | -1.896169 | 1.512823  | 0.001186  |
| H  | -1.561196 | 1.991198  | 0.770714  |
| H  | -1.553325 | 1.990354  | -0.765539 |
| H  | 0.571766  | 1.178121  | -2.431377 |
| H  | -2.314660 | -1.054823 | -1.282422 |
| H  | 0.577169  | 1.173085  | 2.433188  |
| H  | -1.186697 | -1.813298 | 2.030440  |
| O  | 2.604722  | 2.609824  | -0.000926 |
| H  | 2.735245  | 3.564233  | 0.000906  |
| H  | 3.490049  | 2.231142  | -0.003520 |
| N  | 2.245266  | -1.961821 | -0.001117 |
| N  | 1.350409  | -1.269090 | -0.000734 |
| O  | 3.178887  | -2.677594 | -0.001531 |
| O  | -3.633672 | -0.582319 | -0.001486 |
| H  | -4.589128 | -0.681309 | -0.002587 |
| H  | -3.429714 | 0.368355  | -0.001578 |

---  
25.0, 4.6; 39.4, 0.9; 45.5, 3.5; 54.6, 0.1; 93.0, 3.2;  
96.5, 1.1; 110.6, 0.6; 118.8, 0.6; 126.7, 1.4; 134.3,  
10.4; 157.0, 0.4; 165.6, 0.1; 171.0, 0.3; 177.2, 0.3;  
195.5, 1.6; 208.7, 1.3; 223.8, 4.1; 232.8, 17.0; 250.3,  
3.5; 256.3, 10.9; 257.7, 24.5; 261.7, 18.6; 271.5,  
22.3; 273.7, 1.7; 291.1, 168.7; 295.4, 1.7; 321.2, 3.5;  
323.2, 43.3; 378.3, 12.0; 393.1, 92.8; 396.4, 99.4;  
414.1, 25.9; 414.9, 120.4; 446.7, 119.5; 472.9, 88.3;  
487.2, 1.2; 487.5, 2.6; 526.3, 168.7; 528.5, 125.2;

538.8, 299.5; 565.6, 414.8; 637.4, 218.0; 675.6, 72.0;  
 734.9, 229.9; 747.7, 0.4; 764.0, 213.1; 1334.4, 473.7;  
 1574.5, 116.9; 1592.8, 97.1; 1604.0, 158.0; 1622.3,  
 15.1; 1636.1, 7.4; 1637.9, 29.6; 1646.6, 197.5; 2398.5,  
 229.1; 3664.9, 110.3; 3676.9, 393.5; 3711.0, 51.5;  
 3733.4, 1233.2; 3739.0, 24.2; 3800.4, 26.7; 3847.9,  
 36.5; 3892.1, 204.6; 3929.4, 230.9; 3932.7, 100.9;  
 3938.1, 92.9; 3940.5, 226.9; 3945.1, 158.7; 3949.5,  
 158.4;

-2102.159590380 -2101.969282 -2101.944869 -  
 2102.021707

$\eta^1$ -NL [Co(H<sub>2</sub>O)<sub>8</sub>N<sub>2</sub>O]<sup>+</sup>

|    |           |           |           |
|----|-----------|-----------|-----------|
| Co | -0.315304 | 0.195609  | 0.040528  |
| O  | -0.777912 | 1.889194  | 1.417236  |
| H  | -0.387946 | 2.710844  | 1.071328  |
| O  | 0.352232  | -0.992609 | 1.843042  |
| H  | 0.806938  | -1.830524 | 1.642180  |
| O  | -0.220239 | 1.551368  | -1.701196 |
| H  | -0.993235 | 1.759283  | -2.231260 |
| O  | 0.633071  | -1.416069 | -1.347459 |
| H  | 0.726374  | -2.255630 | -0.864140 |
| O  | 1.809805  | 0.975334  | 0.541836  |
| H  | 1.734833  | 0.672278  | 1.456990  |
| H  | 2.499408  | 0.417952  | 0.134024  |
| H  | 0.076524  | -1.578991 | -2.114525 |
| H  | 0.145478  | 2.403377  | -1.401723 |
| H  | -0.197339 | -1.131075 | 2.618285  |
| H  | -1.653696 | 2.107750  | 1.743344  |
| O  | 1.856251  | -2.933221 | 0.573570  |
| H  | 2.648681  | -2.453074 | 0.272797  |
| H  | 2.134098  | -3.820365 | 0.817275  |
| N  | -3.181944 | -0.892086 | -0.230228 |
| N  | -2.126992 | -0.488506 | -0.163564 |
| O  | -4.277985 | -1.310519 | -0.300056 |
| O  | 0.936028  | 3.470914  | -0.070900 |
| H  | 1.353211  | 4.335495  | -0.091309 |
| H  | 1.605266  | 2.814031  | 0.193110  |
| O  | 3.260790  | -0.964596 | -0.809911 |
| H  | 2.522891  | -1.029389 | -1.441696 |
| H  | 4.077953  | -0.897624 | -1.311690 |

29.5, 0.7; 39.6, 0.3; 43.1, 0.1; 61.0, 1.7; 73.7, 1.9;  
 88.5, 1.9; 102.4, 1.0; 115.0, 1.1; 118.5, 0.8; 132.4,  
 6.2; 152.0, 7.6; 164.8, 1.3; 170.9, 1.9; 181.3, 5.7;  
 182.6, 3.0; 196.7, 1.5; 202.1, 2.1; 216.1, 20.5; 230.4,  
 3.7; 241.3, 19.7; 245.4, 1.1; 251.4, 6.1; 261.2, 22.5;  
 266.2, 9.9; 276.3, 110.3; 284.3, 3.9; 299.7, 8.2;  
 313.0, 33.6; 325.1, 107.5; 338.6, 2.1; 362.6, 35.3;  
 379.7, 42.7; 386.8, 112.4; 412.3, 227.5; 424.2, 14.0;  
 439.1, 194.3; 451.8, 44.7; 468.4, 69.2; 491.7, 2.1;  
 501.6, 263.0; 507.5, 29.2; 540.2, 80.1; 558.2, 87.2;  
 564.4, 33.9; 594.2, 276.1; 635.1, 136.7; 636.2, 252.4;  
 730.8, 171.8; 757.0, 35.9; 782.5, 284.6; 829.0, 177.9;  
 878.3, 70.9; 1337.6, 481.8; 1571.9, 110.6; 1578.3,  
 116.7; 1586.1, 78.0; 1608.3, 131.0; 1621.9, 69.3;  
 1624.4, 49.3; 1643.6, 50.9; 1657.1, 120.1; 2400.3,  
 251.3; 3621.6, 335.7; 3647.6, 236.6; 3656.5, 235.0;  
 3666.8, 398.3; 3671.0, 66.9; 3716.7, 437.3; 3720.5,  
 787.5; 3724.4, 445.7; 3838.0, 222.4; 3926.9, 187.9;  
 3933.7, 197.2; 3936.4, 219.9; 3938.9, 133.5; 3940.0,  
 71.5; 3945.9, 230.8; 3949.2, 121.7;

-2178.602355980 -2178.385023 -2178.358900 -  
 2178.439042

$\eta^1$ -NL [Co(H<sub>2</sub>O)<sub>9</sub>N<sub>2</sub>O]<sup>+</sup>

|    |           |           |           |
|----|-----------|-----------|-----------|
| Co | 0.558890  | 0.143876  | -0.211065 |
| O  | 0.041785  | -1.026384 | -2.095972 |
| H  | -0.503284 | -1.812610 | -1.905838 |
| O  | -0.194348 | -1.536118 | 0.966487  |
| H  | -0.786320 | -1.314148 | 1.700203  |
| O  | -0.027314 | 1.517222  | 1.593817  |
| H  | 0.658969  | 1.588804  | 2.263747  |
| O  | 1.065647  | 1.873999  | -1.510965 |
| H  | 1.970705  | 2.095396  | -1.741389 |
| H  | 0.656607  | -1.256350 | -2.796777 |
| H  | 0.620448  | 2.697701  | -1.249971 |
| H  | -0.638265 | -2.232619 | 0.457577  |
| H  | -0.773354 | 1.038842  | 2.012415  |
| O  | -1.771849 | -2.802518 | -0.956794 |
| H  | -2.077773 | -3.687730 | -1.170536 |

|   |           |           |           |
|---|-----------|-----------|-----------|
| H | -2.544280 | -2.289117 | -0.652180 |
| O | -0.841719 | 3.380553  | -0.259352 |
| H | -0.594288 | 3.021620  | 0.612590  |
| H | -1.180327 | 4.270741  | -0.137160 |
| O | -3.416212 | -0.812162 | 0.116961  |
| H | -4.350239 | -0.688816 | -0.074310 |
| H | -2.922375 | -0.121132 | -0.378917 |
| O | -2.096818 | -0.127157 | 2.465076  |
| H | -2.759590 | -0.355775 | 1.783401  |
| H | -2.535443 | -0.168043 | 3.318821  |
| O | -1.607502 | 0.829315  | -0.997982 |
| H | -1.580332 | 1.802923  | -0.948402 |
| H | -1.269930 | 0.570908  | -1.868916 |
| N | 3.406741  | -0.769411 | 0.524448  |
| N | 2.400574  | -0.351947 | 0.226193  |
| O | 4.456810  | -1.196215 | 0.831215  |

28.4, 0.1; 32.1, 0.1; 54.4, 1.3; 69.9, 0.1; 77.4, 0.1;  
 82.3, 0.2; 93.3, 0.3; 104.3, 1.1; 108.9, 0.8; 121.8,  
 0.5; 131.2, 10.3; 139.1, 2.6; 156.7, 3.2; 167.0, 6.0;  
 170.6, 2.3; 182.0, 0.9; 190.6, 2.1; 196.5, 1.5; 212.3,  
 10.3; 223.2, 6.0; 233.8, 6.8; 234.2, 10.1; 240.9, 21.0;  
 257.2, 2.6; 261.7, 26.8; 272.6, 2.3; 280.7, 23.2;  
 288.6, 45.5; 297.5, 21.0; 302.8, 10.3; 317.2, 47.7;  
 328.4, 11.5; 354.0, 54.5; 372.6, 74.1; 379.0, 13.2;  
 397.0, 80.4; 411.4, 22.6; 434.0, 32.7; 443.0, 52.4;  
 482.1, 99.0; 489.4, 118.0; 502.8, 81.8; 509.7, 85.4;  
 519.9, 121.4; 525.6, 36.0; 560.9, 178.3; 564.4, 157.9;  
 626.7, 133.4; 631.3, 194.3; 661.1, 156.2; 691.7, 207.6;  
 717.1, 429.0; 735.6, 11.0; 785.6, 27.5; 790.3, 324.3;  
 823.7, 108.2; 862.9, 49.9; 953.3, 146.7; 1346.0, 453.9;  
 1575.2, 101.0; 1588.8, 157.0; 1612.8, 33.4; 1613.5,  
 89.6; 1622.5, 197.2; 1629.6, 35.1; 1638.3, 22.6;  
 1647.4, 49.4; 1668.0, 7.8; 2413.0, 280.3; 3485.1,  
 412.2; 3562.8, 665.2; 3607.1, 535.7; 3640.0, 786.6;  
 3645.6, 206.1; 3660.4, 200.8; 3668.9, 222.8; 3721.7,  
 535.6; 3731.8, 330.4; 3801.5, 45.4; 3804.7, 1029.9;  
 3917.8, 118.2; 3924.5, 156.4; 3936.3, 168.4; 3938.2,  
 229.1; 3940.7, 64.6; 3945.4, 256.2; 3948.5, 99.2;

-2255.047346010 -2254.802856 -2254.774867 -  
 2254.858856

$\eta^1$ -NL [Co(H<sub>2</sub>O)<sub>10</sub>N<sub>2</sub>O]<sup>+</sup>

|    |           |           |           |
|----|-----------|-----------|-----------|
| Co | 0.535754  | 0.021745  | 0.001170  |
| O  | 0.195998  | -0.181578 | -2.321127 |
| H  | -0.574805 | -0.779323 | -2.405392 |
| O  | -0.301800 | -2.009896 | 0.119956  |
| H  | -0.828262 | -2.206400 | 0.908995  |
| O  | 0.183616  | 0.106847  | 2.326563  |
| H  | 0.922536  | -0.278794 | 2.806248  |
| O  | 1.233977  | 2.113904  | -0.113467 |
| H  | 0.883513  | 2.535279  | -0.912696 |
| H  | 0.935800  | -0.627602 | -2.743723 |
| H  | 0.865630  | 2.625976  | 0.622523  |
| H  | -0.835160 | -2.294869 | -0.637082 |
| H  | -0.585525 | -0.479483 | 2.479511  |
| O  | -2.012940 | -1.858992 | -2.086282 |
| H  | -2.439042 | -2.424353 | -2.735640 |
| H  | -2.704427 | -1.542890 | -1.471537 |
| O  | -0.561224 | 2.699507  | 2.001396  |
| H  | -0.258590 | 1.915228  | 2.493056  |
| H  | -0.803222 | 3.378864  | 2.635263  |
| O  | -3.428114 | -0.747048 | 0.035319  |
| H  | -4.354458 | -0.490752 | 0.018653  |
| H  | -2.892911 | 0.079979  | -0.016656 |
| O  | -2.023317 | -1.583556 | 2.284907  |
| H  | -2.707478 | -1.342856 | 1.628813  |
| H  | -2.459117 | -2.060106 | 2.996120  |
| O  | -1.572663 | 1.167776  | -0.080577 |
| H  | -1.445996 | 1.795040  | 0.658588  |
| H  | -1.434643 | 1.704440  | -0.886469 |
| N  | 3.469712  | -0.975267 | 0.063812  |
| N  | 2.387014  | -0.656632 | 0.044332  |
| O  | 4.595381  | -1.308131 | 0.084020  |
| O  | -0.528411 | 2.438082  | -2.312854 |
| H  | -0.227161 | 1.598130  | -2.702938 |
| H  | -0.763162 | 3.035338  | -3.027060 |

23.2, 0.1; 34.3, 0.0; 50.2, 0.9; 65.4, 0.2; 71.5, 0.5;  
 82.6, 0.3; 88.9, 2.8; 100.4, 0.9; 101.5, 1.5; 114.3,  
 3.8; 118.7, 9.1; 132.0, 1.8; 152.0, 1.4; 154.3, 3.1;  
 163.5, 1.7; 175.1, 0.1; 178.5, 0.1; 183.2, 3.5; 189.8,

4.8; 197.4, 5.5; 216.3, 8.2; 228.2, 13.1; 229.7, 7.4;  
 241.7, 8.5; 242.4, 4.5; 247.3, 3.5; 260.3, 25.4; 265.1,  
 14.2; 283.5, 19.6; 287.3, 52.4; 291.2, 6.0; 320.7, 4.0;  
 333.0, 36.1; 344.7, 13.3; 352.0, 8.8; 369.5, 4.6;  
 370.1, 75.3; 387.2, 7.1; 394.8, 14.4; 410.9, 83.3;  
 420.7, 57.1; 444.7, 23.0; 457.5, 132.0; 461.0, 130.6;  
 491.6, 111.4; 519.7, 1.9; 522.7, 2.6; 531.9, 30.2;  
 544.4, 23.3; 554.7, 34.3; 592.6, 217.1; 638.1, 92.9;  
 661.7, 778.8; 669.0, 225.0; 683.4, 337.7; 730.9, 12.5;  
 741.5, 174.5; 768.7, 98.1; 776.7, 137.2; 835.0, 10.2;  
 844.1, 28.2; 862.0, 102.5; 886.9, 225.9; 991.8, 108.3;  
 1348.0, 456.1; 1569.9, 13.1; 1578.7, 202.0; 1592.7,  
 68.8; 1619.9, 91.8; 1633.4, 103.0; 1636.6, 56.3;  
 1641.6, 33.3; 1654.0, 48.8; 1676.1, 2.3; 1699.1, 95.7;  
 2415.6, 296.1; 3427.4, 688.9; 3557.3, 107.1; 3587.3,  
 1287.0; 3601.9, 400.9; 3608.2, 512.7; 3629.6, 474.5;  
 3641.1, 417.3; 3683.6, 384.1; 3688.4, 6.8; 3738.5,  
 258.1; 3744.0, 490.7; 3813.3, 26.3; 3815.7, 1172.5;  
 3918.5, 23.7; 3919.0, 219.5; 3924.6, 145.0; 3935.3,  
 210.5; 3938.1, 129.6; 3946.1, 107.4; 3946.8, 250.4;

-2331.489203500 -2331.217614 -2331.187656 -  
 2331.275828

$\eta^1\text{-NL} [\text{Co}(\text{H}_2\text{O})_{11}\text{N}_2\text{O}]^+$

|    |           |           |           |
|----|-----------|-----------|-----------|
| Co | 0.508975  | 0.223931  | 0.027124  |
| O  | 0.071526  | 1.961570  | 1.544856  |
| H  | -0.671285 | 2.457467  | 1.142712  |
| O  | -0.403382 | 1.443135  | -1.580618 |
| H  | -1.023804 | 0.950154  | -2.139780 |
| O  | 0.396054  | -1.438415 | -1.621152 |
| H  | 0.846363  | -1.020128 | -2.362354 |
| O  | 1.300007  | -1.068099 | 1.613416  |
| H  | 0.808011  | -1.039557 | 2.446116  |
| H  | 0.812185  | 2.572598  | 1.595782  |
| H  | 1.414528  | -1.996984 | 1.355919  |
| H  | -0.881200 | 2.226993  | -1.271371 |
| H  | -0.546642 | -1.454381 | -1.876272 |
| O  | -2.033116 | 3.027908  | 0.069885  |
| H  | -2.438012 | 3.898610  | 0.094280  |
| H  | -2.743574 | 2.377210  | -0.100613 |
| O  | 1.285216  | -3.402122 | 0.072909  |
| H  | 1.192286  | -2.845005 | -0.722434 |
| H  | 1.933751  | -4.084949 | -0.114688 |
| O  | -3.497081 | 0.740123  | -0.472866 |
| H  | -4.405931 | 0.584156  | -0.202544 |
| H  | -2.911554 | 0.223675  | 0.132419  |
| O  | -2.133868 | -0.567121 | -2.529188 |
| H  | -2.826254 | -0.216880 | -1.936865 |
| H  | -2.569553 | -0.825850 | -3.345347 |
| O  | -1.549810 | -0.541756 | 0.800604  |
| H  | -1.557105 | -1.510182 | 0.620827  |
| H  | -1.428463 | -0.456850 | 1.766066  |
| N  | 3.394054  | 1.098744  | -0.678276 |
| N  | 2.325153  | 0.803432  | -0.463371 |
| O  | 4.505883  | 1.406440  | -0.903023 |
| O  | -0.624311 | 0.010928  | 3.343185  |
| H  | -0.342288 | 0.891498  | 3.036506  |
| H  | -0.898013 | 0.085616  | 4.260095  |
| O  | -1.435652 | -3.167937 | 0.192494  |
| H  | -0.537376 | -3.540183 | 0.254432  |
| H  | -2.054573 | -3.875624 | 0.382279  |

---  
 23.5, 0.1; 25.4, 0.4; 32.2, 0.2; 43.6, 1.5; 70.4, 1.1;  
 73.8, 0.3; 80.8, 0.1; 85.3, 1.3; 94.6, 1.7; 101.5, 2.4;  
 111.6, 1.5; 119.8, 0.7; 137.4, 6.1; 140.2, 0.4; 148.1,  
 4.5; 158.2, 4.8; 167.6, 0.9; 177.2, 2.1; 185.7, 2.6;  
 193.6, 3.3; 199.3, 2.3; 203.3, 11.3; 214.7, 3.7; 222.8,  
 7.1; 226.8, 13.1; 231.5, 2.6; 236.2, 44.0; 240.5, 56.9;  
 259.3, 1.6; 259.9, 22.3; 270.3, 3.4; 279.7, 23.8;  
 288.5, 20.2; 292.7, 30.5; 305.0, 20.7; 313.4, 27.9;  
 326.5, 17.2; 348.4, 26.2; 349.6, 48.9; 354.8, 57.6;  
 358.7, 32.0; 383.8, 0.1; 401.6, 20.4; 407.0, 36.7;  
 417.9, 17.3; 436.0, 67.5; 453.0, 280.8; 473.9, 52.6;  
 495.8, 88.9; 512.1, 7.7; 513.9, 9.1; 518.6, 45.1;  
 530.5, 168.9; 544.5, 19.8; 554.0, 32.4; 572.0, 32.9;  
 629.2, 244.8; 635.5, 502.3; 662.1, 248.5; 675.4, 450.6;  
 713.0, 81.2; 732.2, 9.6; 743.8, 91.5; 763.8, 166.7;  
 794.8, 100.5; 826.6, 82.7; 838.1, 162.1; 867.7, 42.6;  
 945.9, 212.4; 1037.5, 92.3; 1340.9, 479.1; 1578.4,  
 94.7; 1585.0, 134.4; 1595.3, 53.3; 1611.6, 4.8; 1620.7,  
 62.3; 1626.4, 149.4; 1634.1, 72.5; 1637.7, 127.0;  
 1647.3, 45.2; 1678.9, 56.6; 1685.0, 8.6; 2408.0, 274.2;

3389.7, 984.9; 3498.3, 532.2; 3562.9, 534.7; 3604.3,  
 698.3; 3620.7, 486.1; 3628.6, 185.8; 3648.9, 882.0;  
 3668.5, 267.4; 3678.6, 205.1; 3684.4, 203.4; 3726.7,  
 486.4; 3733.9, 287.2; 3807.6, 619.1; 3825.1, 692.0;  
 3902.7, 93.2; 3921.2, 114.5; 3928.6, 142.1; 3936.8,  
 202.5; 3940.2, 126.0; 3944.4, 161.9; 3952.9, 169.2;  
 3957.8, 172.4;

-2407.928421270 -2407.631702 -2407.598918 -  
 2407.693728

$\eta^1\text{-NL} [\text{Co}(\text{H}_2\text{O})_{12}\text{N}_2\text{O}]^+$

|    |           |           |           |
|----|-----------|-----------|-----------|
| Co | 0.507483  | 0.335707  | 0.042222  |
| O  | -1.304684 | 1.055626  | -1.215204 |
| H  | -1.569246 | 0.361811  | -1.846604 |
| O  | -3.107928 | -2.103905 | -0.153748 |
| H  | -3.927633 | -2.600370 | -0.228460 |
| O  | 0.402326  | -1.637245 | -1.144896 |
| H  | 0.288049  | -2.334785 | -0.474334 |
| H  | -2.826691 | -1.899787 | -1.070269 |
| H  | 1.302274  | -1.701042 | -1.534492 |
| H  | -2.041289 | 1.097561  | 0.575506  |
| O  | 0.366083  | 2.343395  | 0.950380  |
| H  | -0.337132 | 2.409329  | 1.618400  |
| H  | 0.201902  | 3.030413  | 0.288379  |
| O  | -0.992838 | -0.490499 | 1.470997  |
| H  | -0.771144 | -1.399240 | 1.724918  |
| H  | -1.063934 | 0.059611  | 2.266109  |
| O  | -1.803169 | 1.837602  | 2.656960  |
| H  | -2.571627 | 1.622331  | 2.097864  |
| H  | -2.130224 | 2.269096  | 3.449726  |
| O  | -3.382303 | 0.709356  | 0.657645  |
| H  | -4.310611 | 0.751058  | 0.413288  |
| H  | -3.145945 | -0.237019 | 0.697215  |
| O  | -0.735392 | -3.130336 | 0.886458  |
| H  | -0.669967 | -4.026905 | 1.223622  |
| H  | -1.653806 | -2.993103 | 0.580207  |
| O  | -1.865154 | -1.352885 | -2.488981 |
| H  | -0.956387 | -1.603549 | -2.199451 |
| H  | -1.984249 | -1.639836 | -3.397532 |
| O  | 1.974909  | 1.414410  | -1.427534 |
| H  | 2.592744  | 1.803755  | -0.799749 |
| H  | 1.459181  | 2.170776  | -1.770712 |
| O  | 0.052324  | 3.342035  | -1.708728 |
| H  | -0.657375 | 2.672718  | -1.759191 |
| H  | -0.186676 | 4.083653  | -2.268906 |
| O  | 2.807193  | -1.120346 | -2.166633 |
| H  | 2.699570  | -0.154504 | -2.172872 |
| H  | 3.412445  | -1.358669 | -2.870798 |
| N  | 2.940616  | -0.720002 | 1.643932  |
| N  | 2.056177  | -0.303329 | 1.076933  |
| O  | 3.859655  | -1.152717 | 2.236172  |

---  
 24.5, 0.3; 29.0, 0.8; 41.9, 0.6; 52.0, 1.4; 58.1, 0.1;  
 66.7, 3.1; 76.2, 0.3; 78.3, 0.7; 88.0, 1.7; 100.3, 1.5;  
 105.2, 3.4; 113.2, 2.8; 129.6, 1.4; 132.0, 5.0; 140.4,  
 6.9; 147.7, 0.3; 162.5, 1.1; 169.8, 5.7; 173.5, 3.6;  
 175.5, 2.1; 181.2, 5.8; 185.4, 1.8; 203.9, 4.1; 207.4,  
 3.0; 215.1, 2.9; 221.8, 7.7; 226.2, 2.3; 230.3, 87.4;  
 233.0, 31.4; 242.4, 5.0; 246.3, 27.2; 252.2, 10.0;  
 262.3, 12.7; 270.7, 44.3; 282.5, 15.9; 292.2, 6.5;  
 297.8, 12.3; 314.4, 12.7; 326.8, 7.9; 331.1, 18.5;  
 340.8, 54.8; 350.7, 88.3; 358.0, 12.9; 372.0, 76.6;  
 381.5, 51.4; 388.1, 2.5; 391.5, 3.7; 413.2, 55.0;  
 424.0, 57.4; 431.2, 43.3; 454.3, 58.6; 467.3, 296.5;  
 496.7, 121.8; 499.9, 44.9; 508.0, 1.4; 511.5, 133.9;  
 524.2, 32.4; 541.8, 222.8; 557.1, 156.0; 573.1, 127.2;  
 617.6, 115.5; 646.3, 194.7; 659.7, 15.5; 667.6, 341.1;  
 693.4, 104.8; 734.8, 43.8; 766.3, 171.0; 775.5, 123.5;  
 782.8, 32.3; 810.2, 502.4; 832.5, 77.9; 849.5, 22.0;  
 867.4, 150.2; 896.3, 206.3; 901.0, 133.6; 990.0, 89.2;  
 1336.6, 484.2; 1573.7, 68.2; 1575.4, 44.2; 1584.8,  
 118.6; 1590.9, 157.4; 1593.5, 59.2; 1608.3, 156.1;  
 1612.4, 62.6; 1624.5, 1.2; 1632.0, 137.3; 1635.2, 23.5;  
 1667.7, 47.6; 1681.8, 67.5; 2403.7, 260.3; 3426.4,  
 764.2; 3522.6, 239.4; 3560.3, 447.4; 3581.9, 569.2;  
 3611.5, 451.5; 3620.8, 605.0; 3650.4, 554.2; 3653.2,  
 368.6; 3685.0, 507.3; 3686.5, 357.8;  
 3695.0, 529.3; 3709.8, 370.5; 3719.0, 276.1; 3728.6,  
 182.9; 3807.3, 725.4; 3821.2, 581.8; 3899.3, 103.7;  
 3926.4, 114.9; 3935.9, 151.2; 3941.2, 188.2; 3946.1,  
 133.7; 3948.6, 150.1; 3951.3, 163.8; 3967.1, 173.3;

-2484.370290370 -2484.047523 -2484.012446 -  
2484.111537

| $\eta^1\text{-NL}$ [Co(H <sub>2</sub> O) <sub>13</sub> N <sub>2</sub> O] <sup>+</sup> |           |           |           |
|---------------------------------------------------------------------------------------|-----------|-----------|-----------|
| Co                                                                                    | -0.328086 | 0.066185  | 0.028718  |
| O                                                                                     | 1.269109  | 1.035533  | 1.392761  |
| H                                                                                     | 1.732796  | 0.326983  | 1.876646  |
| O                                                                                     | 3.811288  | -1.229136 | -0.275609 |
| H                                                                                     | 4.738295  | -1.482641 | -0.290044 |
| O                                                                                     | 0.389960  | -2.005401 | 0.771450  |
| H                                                                                     | 0.654610  | -2.478001 | -0.037911 |
| H                                                                                     | 3.526435  | -1.288897 | 0.660468  |
| H                                                                                     | -0.446672 | -2.394345 | 1.113350  |
| H                                                                                     | 1.943998  | 1.396837  | 0.786865  |
| O                                                                                     | -0.877300 | 2.238231  | -0.479156 |
| H                                                                                     | -0.208623 | 2.605911  | -1.085650 |
| H                                                                                     | -0.810805 | 2.723585  | 0.361723  |
| O                                                                                     | 1.257072  | 0.029045  | -1.547993 |
| H                                                                                     | 1.268833  | -0.843979 | -1.971319 |
| H                                                                                     | 1.097675  | 0.708198  | -2.219368 |
| O                                                                                     | 1.289990  | 2.707860  | -2.165343 |
| H                                                                                     | 2.121432  | 2.576082  | -1.672805 |
| H                                                                                     | 1.450144  | 3.382320  | -2.829491 |
| O                                                                                     | 3.254892  | 1.655047  | -0.506460 |
| H                                                                                     | 4.156605  | 1.886672  | -0.269075 |
| H                                                                                     | 3.263473  | 0.711053  | -0.754929 |
| O                                                                                     | 1.771377  | -2.633892 | -1.544644 |
| H                                                                                     | 1.934154  | -3.419059 | -2.072520 |
| H                                                                                     | 2.631615  | -2.318211 | -1.203962 |
| O                                                                                     | 2.529490  | -1.314992 | 2.159608  |
| H                                                                                     | 1.720001  | -1.764831 | 1.817932  |
| H                                                                                     | 2.772899  | -1.721894 | 2.994542  |
| O                                                                                     | -1.944639 | 0.308855  | 1.657869  |
| H                                                                                     | -2.682716 | 0.657728  | 1.114643  |
| H                                                                                     | -1.671819 | 1.062662  | 2.206141  |
| O                                                                                     | -0.646156 | 2.716830  | 2.280700  |
| H                                                                                     | 0.219376  | 2.266983  | 2.238850  |
| H                                                                                     | -0.596761 | 3.407567  | 2.945114  |
| O                                                                                     | -2.047076 | -2.422829 | 1.749933  |
| H                                                                                     | -2.201492 | -1.485277 | 1.966679  |
| H                                                                                     | -2.561346 | -2.960458 | 2.354014  |
| N                                                                                     | -2.688230 | -1.214903 | -1.496785 |
| N                                                                                     | -1.725343 | -0.789694 | -1.090533 |
| O                                                                                     | -3.686406 | -1.655183 | -1.928399 |
| O                                                                                     | -3.521490 | 1.422487  | -0.273084 |
| H                                                                                     | -4.320354 | 1.940828  | -0.385923 |
| H                                                                                     | -2.779299 | 1.929706  | -0.641216 |

32.1, 1.8; 32.8, 0.4; 44.3, 0.1; 55.4, 1.4; 57.0, 0.5;  
60.7, 1.2; 72.5, 0.5; 77.4, 0.1; 84.3, 1.3; 89.2, 3.0;  
97.1, 0.2; 110.9, 3.9; 116.5, 1.5; 121.7, 0.9; 127.4,  
5.2; 134.4, 1.5; 147.9, 5.8; 149.9, 1.4; 164.7, 0.6;  
169.1, 2.6; 171.3, 8.8; 175.9, 7.3; 184.1, 7.2; 188.1,  
8.9; 204.4, 3.5; 215.6, 9.1; 217.1, 4.1; 219.1, 6.0;  
231.0, 6.5; 234.0, 37.0; 237.1, 7.5; 241.5, 9.8; 249.6,  
20.5; 257.6, 51.3; 259.4, 10.8; 265.5, 5.2; 269.3,  
40.0; 274.4, 91.5; 280.5, 46.0; 292.1, 14.7; 305.7,  
6.9; 317.3, 15.7; 323.7, 43.8; 334.7, 16.1; 347.6,  
24.6; 361.1, 15.8; 371.3, 39.5; 380.8, 51.0; 382.0,  
73.4; 392.3, 6.2; 405.8, 64.5; 413.5, 69.0; 425.3,  
108.3; 427.9, 38.9; 459.2, 170.9; 474.0, 201.2; 498.3,  
113.2; 511.6, 98.0; 519.8, 2.3; 526.8, 27.0; 531.6,  
8.9; 540.9, 164.3; 555.6, 100.7; 566.7, 136.9; 619.4,  
90.0; 650.8, 176.1; 657.2, 52.6; 677.6, 304.5; 691.8,  
56.7; 715.9, 84.9; 749.8, 30.4; 771.5, 204.0; 781.3,  
150.8; 799.3, 58.7; 809.1, 464.2; 830.9, 8.3; 853.0,  
73.7; 875.3, 182.9; 901.6, 194.5; 916.1, 188.7; 926.1,  
133.1; 993.0, 88.3; 1351.0, 408.8; 1573.9, 83.0;  
1575.0, 56.3; 1579.7, 139.3; 1585.6, 75.2; 1591.1,  
148.7; 1595.0, 109.7; 1609.7, 109.7; 1611.1, 43.7;  
1631.1, 39.7; 1638.7, 62.2; 1639.9, 47.3; 1681.7, 52.5;  
1685.2, 64.4; 2422.1, 291.6; 3407.3, 852.2; 3507.2,  
270.7; 3559.0, 371.9; 3560.7, 571.2; 3599.4, 356.5;  
3610.1, 166.7; 3626.6, 1342.0; 3648.1, 230.8; 3659.0,  
181.9; 3668.6, 611.9; 3678.2, 363.3; 3691.6, 369.7;  
3705.1, 555.6; 3718.3, 11.7; 3728.6, 202.2; 3733.0,  
615.2; 3757.9, 760.9; 3825.8, 632.9; 3927.4, 113.5;  
3936.8, 144.9; 3940.6, 195.8; 3946.4, 149.8; 3947.3,  
133.8; 3951.3, 157.7; 3965.5, 161.6; 3969.2, 167.1;

-2560.813336410 -2560.464217 -2560.426828 -  
2560.530308

| $\eta^1\text{-NL}$ [Co(H <sub>2</sub> O) <sub>14</sub> N <sub>2</sub> O] <sup>+</sup> |           |           |           |
|---------------------------------------------------------------------------------------|-----------|-----------|-----------|
| Co                                                                                    | -0.713000 | 0.088694  | 0.003311  |
| O                                                                                     | 1.080870  | 0.159223  | 1.411378  |
| H                                                                                     | 1.867806  | -0.037751 | 0.851996  |
| O                                                                                     | 2.923031  | 2.523684  | -1.035089 |
| H                                                                                     | 3.742020  | 2.991023  | -1.219765 |
| O                                                                                     | 0.690909  | -0.551441 | -1.664528 |
| H                                                                                     | 0.670808  | 0.101632  | -2.385334 |
| H                                                                                     | 3.169003  | 1.587209  | -0.832326 |
| H                                                                                     | 0.376125  | -1.415872 | -1.987932 |
| H                                                                                     | 1.210705  | 1.097798  | 1.641575  |
| O                                                                                     | -1.832622 | 0.843684  | 1.919848  |
| H                                                                                     | -1.674215 | 1.808707  | 1.972873  |
| H                                                                                     | -1.385587 | 0.466085  | 2.683640  |
| O                                                                                     | -0.179648 | 2.179621  | -0.510747 |
| H                                                                                     | -0.093585 | 2.323790  | -1.466799 |
| H                                                                                     | -0.752622 | 2.862493  | -0.136745 |
| O                                                                                     | -0.999941 | 3.471664  | 1.760043  |
| H                                                                                     | -0.023766 | 3.484025  | 1.817160  |
| H                                                                                     | -1.328446 | 4.277224  | 2.165765  |
| O                                                                                     | 1.696934  | 2.931087  | 1.528134  |
| H                                                                                     | 2.465871  | 3.252222  | 2.006792  |
| H                                                                                     | 1.952443  | 2.910486  | 0.582509  |
| O                                                                                     | 0.999628  | 1.896798  | -2.938638 |
| H                                                                                     | 1.060539  | 2.229827  | -3.836841 |
| H                                                                                     | 1.784716  | 2.218536  | -2.450000 |
| O                                                                                     | 3.024057  | -0.127907 | -0.514632 |
| H                                                                                     | 2.321848  | -0.161467 | -1.192582 |
| H                                                                                     | 3.016242  | -0.998912 | -0.057919 |
| O                                                                                     | -1.299023 | -2.031819 | 0.700049  |
| H                                                                                     | -2.238661 | -1.920871 | 0.951481  |
| H                                                                                     | -0.811263 | -2.287463 | 1.504188  |
| O                                                                                     | 0.604581  | -2.199661 | 2.637963  |
| H                                                                                     | 0.910583  | -1.284314 | 2.477469  |
| H                                                                                     | 0.867988  | -2.465574 | 3.521399  |
| O                                                                                     | -0.159650 | -3.036268 | -1.542650 |
| H                                                                                     | -0.746061 | -2.825635 | -0.787080 |
| H                                                                                     | -0.553946 | -3.758333 | -2.036599 |
| N                                                                                     | -3.359999 | -0.104570 | -1.575882 |
| N                                                                                     | -2.340967 | 0.032067  | -1.108981 |
| O                                                                                     | -4.420369 | -0.244539 | -2.063011 |
| O                                                                                     | -0.572997 | -0.290543 | 4.006736  |
| H                                                                                     | -1.290422 | -0.449039 | 4.623130  |
| H                                                                                     | -0.252722 | -1.148977 | 3.688115  |
| O                                                                                     | 1.947199  | -2.413163 | 0.214304  |
| H                                                                                     | 1.489240  | -2.402655 | 1.067218  |
| H                                                                                     | 1.288488  | -2.658708 | -0.453057 |

24.6, 0.0; 27.2, 0.5; 31.6, 0.5; 51.4, 1.5; 52.7, 2.9;  
62.2, 3.2; 64.6, 2.8; 71.8, 0.7; 79.3, 0.9; 84.7, 0.1;  
90.8, 2.4; 95.9, 0.8; 98.7, 2.5; 115.4, 1.2; 121.3,  
2.7; 127.1, 1.6; 131.6, 4.4; 134.5, 4.4; 148.3, 8.8;  
153.3, 2.5; 162.3, 1.2; 167.7, 3.6; 177.5, 0.9; 181.4,  
4.0; 186.6, 2.8; 191.8, 5.2; 195.0, 2.1; 198.3, 3.1;  
209.4, 0.9; 215.1, 13.7; 231.7, 15.1; 238.0, 10.3;  
246.0, 12.7; 252.0, 12.5; 258.3, 6.7; 264.4, 27.6;  
266.9, 10.0; 269.9, 2.4; 276.2, 24.3; 282.6, 98.4;  
288.4, 16.9; 297.2, 15.9; 307.4, 31.8; 318.4, 27.2;  
325.4, 6.2; 330.5, 5.9; 336.8, 7.2; 343.5, 12.5; 359.1,  
23.2; 362.4, 57.2; 365.2, 59.4; 372.3, 92.7; 383.8,  
41.7; 390.8, 62.1; 400.7, 29.6; 431.7, 80.7; 445.5,  
75.8; 448.8, 17.1; 461.0, 39.9; 470.3, 180.1; 487.3,  
141.3; 490.3, 11.3; 502.3, 0.2; 505.2, 54.7; 508.1,  
290.5; 526.9, 83.2; 534.7, 156.1; 563.0, 62.7; 575.2,  
89.1; 585.6, 204.0; 625.0, 55.1; 644.7, 463.1; 654.2,  
173.1; 675.3, 36.6; 690.4, 13.9; 699.0, 138.6; 729.5,  
100.5; 743.2, 84.2; 754.6, 153.8; 771.3, 188.0; 794.6,  
110.8; 810.6, 290.9; 824.4, 55.5; 833.3, 52.7; 871.8,  
271.1; 892.3, 285.6; 923.3, 58.0; 978.7, 149.9; 1327.8,  
511.1; 1564.4, 55.8; 1578.9, 179.2; 1590.0, 34.4;  
1598.1, 113.1; 1603.9, 74.8; 1615.0, 113.4; 1618.8,  
94.8; 1622.1, 87.8; 1626.8, 98.7; 1631.3, 75.6; 1635.0,  
44.7; 1667.3, 6.4; 1675.8, 85.8; 1689.7, 124.0; 2398.8,  
239.7; 3483.8, 330.5; 3523.0, 814.7; 3554.9, 239.8;  
3586.0, 625.6; 3608.9, 342.8; 3616.1, 105.3; 3628.5,  
646.1; 3647.6, 1022.9; 3652.2, 179.9; 3665.2, 250.5;  
3674.1, 67.8; 3694.6, 431.8; 3711.3, 190.9; 3716.4,  
572.0; 3727.7, 460.0; 3737.2, 404.3; 3767.6, 457.9;  
3804.3, 921.3; 3834.3, 598.7; 3850.2, 217.1; 3924.4,  
126.0; 3936.4, 156.0; 3942.4, 132.1; 3948.3, 124.0;  
3948.7, 158.9; 3951.0, 112.4; 3951.6, 174.1; 3959.0,  
156.1;

-2637.208575580 -2636.874915 -2636.834811 -  
2636.944576

$\eta^1$ -NL [Co(H<sub>2</sub>O)<sub>15</sub>N<sub>2</sub>O]<sup>+</sup>

|    |           |           |           |
|----|-----------|-----------|-----------|
| Co | -0.713000 | 0.088694  | 0.003311  |
| O  | 1.080870  | 0.159223  | 1.411378  |
| H  | 1.867806  | -0.037751 | 0.851996  |
| O  | 2.923031  | 2.523684  | -1.035089 |
| H  | 3.742020  | 2.991023  | -1.219765 |
| O  | 0.690909  | -0.551441 | -1.664528 |
| H  | 0.670808  | 0.101632  | -2.385334 |
| H  | 3.169003  | 1.587209  | -0.832326 |
| H  | 0.376125  | -1.415872 | -1.987932 |
| H  | 1.210705  | 1.097798  | 1.641575  |
| O  | -1.832622 | 0.843684  | 1.919848  |
| H  | -1.674215 | 1.808807  | 1.972873  |
| H  | -1.385587 | 0.466085  | 2.683640  |
| O  | -0.179648 | 2.179621  | -0.510747 |
| H  | -0.093585 | 2.323790  | -1.466799 |
| H  | -0.752622 | 2.862493  | -0.136745 |
| O  | -0.999941 | 3.471664  | 1.760043  |
| H  | -0.023766 | 3.484025  | 1.817160  |
| H  | -1.328446 | 4.277224  | 2.165765  |
| O  | 1.696934  | 2.931087  | 1.528134  |
| H  | 2.465871  | 3.252222  | 2.006792  |
| H  | 1.952443  | 2.910486  | 0.582509  |
| O  | 0.999628  | 1.896798  | -2.938638 |
| H  | 1.060539  | 2.229827  | -3.836841 |
| H  | 1.784716  | 2.218536  | -2.450000 |
| O  | 3.078788  | -0.058806 | -0.435582 |
| H  | 2.402391  | -0.486214 | -0.995626 |
| H  | 3.782964  | -0.728497 | -0.284095 |
| O  | -1.299023 | -2.031819 | 0.700049  |
| H  | -2.238661 | -1.920871 | 0.951481  |
| H  | -0.811263 | -2.287463 | 1.504188  |
| O  | 0.604581  | -2.199661 | 2.637963  |
| H  | 0.910583  | -1.284314 | 2.477469  |
| H  | 0.867988  | -2.465574 | 3.521399  |
| O  | -0.259661 | -3.088191 | -1.571253 |
| H  | -0.846072 | -2.877558 | -0.815683 |
| H  | -0.653957 | -3.810256 | -2.065202 |
| N  | -3.359999 | -0.104570 | -1.575882 |
| N  | -2.340967 | 0.032067  | -1.108981 |
| O  | -4.420369 | -0.244539 | -2.063011 |
| O  | -3.773129 | -1.060580 | 1.290717  |
| H  | -4.616154 | -1.249491 | 1.707111  |
| H  | -3.451023 | -0.211355 | 1.631407  |
| O  | 4.573159  | -2.207299 | 0.143788  |
| H  | 5.304892  | -2.735853 | -0.176885 |
| H  | 3.774150  | -2.766472 | 0.154409  |
| O  | 1.973871  | -2.949310 | 0.211796  |
| H  | 1.515912  | -2.938802 | 1.064710  |
| H  | 1.315160  | -3.194855 | -0.455565 |

---  
26.7, 1.3; 28.3, 0.6; 39.8, 0.8; 42.6, 1.0; 55.1, 2.4;  
62.5, 0.4; 64.6, 2.1; 68.7, 2.6; 77.7, 0.9; 82.9, 0.4;  
85.9, 4.0; 90.2, 0.6; 94.2, 5.7; 104.5, 1.1; 110.7,  
3.9; 117.3, 2.1; 124.0, 1.3; 130.3, 11.0; 141.6, 0.3;  
145.3, 4.0; 148.3, 4.3; 165.7, 1.3; 167.9, 1.3; 171.4,  
4.4; 175.9, 4.6; 180.1, 1.6; 185.5, 5.1; 192.4, 7.0;  
193.7, 11.1; 200.9, 9.7; 206.9, 8.0; 218.1, 11.9;  
229.9, 7.2; 230.0, 125.9; 232.2, 28.3; 244.0, 18.0;  
248.2, 26.8; 253.7, 7.7; 257.8, 80.6; 267.5, 15.8;  
274.3, 8.3; 276.8, 6.0; 289.1, 15.7; 290.2, 16.1;  
293.8, 8.0; 302.6, 21.4; 307.8, 14.0; 319.5, 10.5;  
322.6, 7.9; 333.9, 39.2; 339.7, 2.7; 359.1, 5.1; 369.9,  
17.6; 376.8, 21.5; 379.8, 89.3; 390.8, 60.6; 400.3,  
5.3; 403.7, 135.1; 420.3, 100.1; 432.1, 24.9; 452.0,  
54.8; 459.0, 59.0; 466.9, 235.2; 487.9, 172.5; 502.1,  
63.4; 504.4, 2.8; 512.8, 13.9; 519.7, 72.3; 539.9,  
124.8; 543.9, 184.4; 564.6, 189.9; 567.5, 178.4; 586.3,  
41.2; 611.5, 76.7; 621.6, 173.6; 631.1, 62.9; 657.7,  
216.5; 662.8, 133.1; 706.4, 79.4; 715.0, 118.8; 728.7,  
118.6; 764.8, 142.6; 784.8, 155.0; 798.5, 114.5; 815.0,  
158.8; 821.1, 33.5; 841.5, 157.2; 847.5, 66.7; 881.5,  
236.8; 886.2, 140.6; 896.9, 59.8; 904.3, 237.2; 974.1,  
241.9; 1020.4, 108.4; 1340.5, 455.4; 1575.0, 68.6;  
1579.9, 248.8; 1582.5, 24.1; 1588.9, 31.1; 1592.7,  
125.1; 1602.9, 135.9; 1604.5, 108.2; 1619.6, 43.7;  
1624.7, 45.1; 1631.7, 166.9; 1643.8, 10.6; 1651.3,  
49.0; 1658.7, 54.0; 1670.5, 28.0; 1697.6, 59.1; 2410.8,  
265.5; 3373.9, 975.3; 3443.4, 860.2; 3536.8, 340.5;

3548.9, 320.0; 3559.1, 979.1; 3573.0, 308.6; 3594.1,  
1167.5; 3604.0, 156.9; 3608.9, 219.8; 3624.4, 252.6;  
3631.0, 270.5; 3655.5, 732.7; 3674.1, 757.0; 3684.7,  
712.4; 3692.3, 416.4; 3710.2, 187.3; 3737.9, 351.8;  
3748.4, 637.3; 3750.9, 129.3; 3821.0, 613.1; 3837.5,  
597.2; 3909.4, 126.8; 3927.5, 71.8; 3930.9, 184.1;  
3946.5, 155.5; 3948.4, 131.2; 3950.3, 147.1; 3953.8,  
151.6; 3966.2, 181.7; 3974.3, 156.8;

-2713.689875380 -2713.288878 -2713.246663 -  
2713.360720

$\eta^1$ -NL [Co(H<sub>2</sub>O)<sub>16</sub>N<sub>2</sub>O]<sup>+</sup>

|    |           |           |           |
|----|-----------|-----------|-----------|
| Co | -0.638760 | 0.196208  | -0.177393 |
| O  | 1.075309  | -0.084424 | 1.306261  |
| H  | 1.894205  | -0.115948 | 0.757834  |
| O  | 3.151757  | 2.601003  | -0.477396 |
| H  | 3.991033  | 3.068212  | -0.501388 |
| O  | 0.888318  | -0.215504 | -1.848606 |
| H  | 0.939000  | 0.567712  | -2.424082 |
| H  | 3.364653  | 1.637613  | -0.450037 |
| H  | 0.531145  | -0.971180 | -2.349358 |
| H  | 1.149362  | 0.762679  | 1.782202  |
| O  | -1.931800 | 0.716808  | 1.625222  |
| H  | -1.756660 | 1.632006  | 1.908204  |
| H  | -1.758899 | 0.132892  | 2.390452  |
| O  | 0.017670  | 2.310792  | -0.290791 |
| H  | 0.173666  | 2.628749  | -1.193338 |
| H  | -0.550631 | 2.940687  | 0.175793  |
| O  | -0.968610 | 3.307840  | 2.055982  |
| H  | -0.015198 | 3.226898  | 2.251190  |
| H  | -1.304110 | 4.066181  | 2.538995  |
| O  | 1.703721  | 2.588696  | 2.023244  |
| H  | 2.440252  | 2.800126  | 2.602914  |
| H  | 2.028377  | 2.722139  | 1.109409  |
| O  | 1.396577  | 2.406094  | -2.626844 |
| H  | 1.563423  | 2.880672  | -3.444258 |
| H  | 2.132996  | 2.605830  | -2.013622 |
| O  | 3.186209  | -0.062960 | -0.411452 |
| H  | 2.544371  | -0.340835 | -1.093930 |
| H  | 3.821077  | -0.804721 | -0.297126 |
| O  | -1.321657 | -2.009749 | 0.136297  |
| H  | -2.273242 | -1.873947 | 0.342337  |
| H  | -0.921641 | -2.445199 | 0.903053  |
| O  | 0.579416  | -2.552924 | 2.191224  |
| H  | 0.924579  | -1.642939 | 2.029874  |
| H  | 1.235769  | -3.039722 | 2.697122  |
| O  | -0.255922 | -2.644203 | -2.292798 |
| H  | -0.853961 | -2.547415 | -1.523787 |
| H  | -0.685558 | -3.213168 | -2.935266 |
| N  | -3.092829 | 0.373582  | -2.047168 |
| N  | -2.133175 | 0.374106  | -1.452027 |
| O  | -4.090007 | 0.373327  | -2.669808 |
| O  | -3.803313 | -1.011127 | 0.550534  |
| H  | -4.634012 | -1.265474 | 0.956398  |
| H  | -3.471619 | -0.226310 | 1.020685  |
| O  | 4.444229  | -2.401383 | -0.011292 |
| H  | 5.201867  | -2.898802 | -0.322396 |
| H  | 3.639149  | -2.902863 | -0.238486 |
| O  | 1.853926  | -3.068354 | -0.438526 |
| H  | 1.288811  | -3.064573 | 0.344665  |
| H  | 1.256402  | -3.096191 | -1.202146 |
| O  | -1.584869 | -1.295242 | 3.421708  |
| H  | -0.858912 | -1.910949 | 3.231058  |
| H  | -1.934774 | -1.513116 | 4.287324  |

---  
25.7, 0.5; 30.8, 0.3; 34.6, 1.2; 44.2, 1.0; 51.5, 1.3;  
57.6, 2.1; 64.3, 3.1; 69.3, 3.2; 72.4, 0.6; 80.4, 3.7;  
81.4, 3.2; 87.2, 5.2; 91.4, 6.1; 95.5, 0.7; 103.4, 2.2;  
105.2, 3.1; 119.7, 11.6; 124.9, 4.9; 126.2, 3.6; 130.8,  
2.8; 138.0, 0.9; 142.9, 3.2; 150.8, 89.7; 157.4, 8.5,  
165.4, 23.3; 170.7, 2.7; 173.8, 4.2; 181.7, 5.7; 184.4,  
3.5; 187.4, 1.5; 195.1, 4.4; 199.2, 6.2; 206.0, 7.0;  
214.7, 9.6; 226.8, 15.6; 228.2, 35.1; 228.6, 16.9,  
245.0, 1.9; 247.9, 8.0; 251.6, 40.8; 252.9, 11.3;  
258.5, 117.0; 266.2, 21.2; 275.3, 10.6; 276.6, 11.1;  
285.0, 2.7; 287.3, 26.2; 293.7, 11.6; 298.4, 33.1;  
299.8, 12.4; 308.1, 20.7; 315.5, 16.5; 329.8, 10.0;  
335.4, 25.1; 343.2, 3.0; 359.8, 5.9; 367.4, 9.5; 375.1,  
110.7; 379.5, 16.0; 393.6, 25.5; 404.8, 16.1; 413.7,  
30.5; 428.6, 202.4; 445.3, 136.7; 450.9, 31.3; 454.4,  
39.1; 480.2, 146.8; 494.9, 123.9; 497.2, 80.7; 503.0,  
10.0; 511.8, 6.7; 518.7, 307.1; 527.7, 41.7; 531.3,

274.1; 544.1, 7.1; 566.9, 101.7; 575.8, 215.0; 597.8, 37.8; 611.2, 147.5; 624.8, 65.6; 636.8, 125.8; 654.7, 33.4; 685.6, 267.6; 706.2, 161.8; 713.5, 75.6; 726.8, 83.8; 750.4, 187.7; 766.0, 141.5; 779.5, 202.3; 797.4, 14.8; 810.9, 28.6; 826.5, 183.5; 852.2, 226.1; 865.0, 146.8; 874.3, 80.7; 889.9, 227.1; 941.9, 63.7; 949.8, 399.0; 978.0, 30.2; 1027.1, 72.0; 1339.1, 463.8; 1575.2, 42.7; 1584.3, 98.4; 1586.6, 171.3; 1591.3, 22.8; 1597.5, 237.0; 1601.7, 90.3; 1604.5, 40.8; 1617.5, 72.6; 1618.1, 1.9; 1622.8, 59.1; 1628.3, 187.2; 1642.8, 4.6; 1652.9, 36.1; 1662.4, 43.0; 1672.7, 70.1; 1699.6, 57.0; 2409.6, 263.1; 3400.6, 938.2; 3421.0, 728.9; 3474.9, 897.3; 3503.9, 848.5; 3545.6, 141.8; 3574.7, 282.9; 3587.3, 187.3; 3598.0, 543.8; 3613.0, 711.2; 3623.3, 474.5; 3636.9, 33.5; 3661.3, 532.9; 3674.8, 881.9; 3690.6, 915.1; 3704.4, 225.0; 3705.7, 273.0; 3717.4, 140.3; 3724.5, 281.0; 3736.6, 631.1; 3751.3, 567.6; 3797.9, 347.3; 3823.5, 669.2; 3850.6, 572.1; 3926.4, 135.7; 3929.4, 76.0; 3933.3, 187.2; 3948.8, 81.2; 3949.1, 199.1; 3951.3, 133.8; 3963.5, 131.0; 3966.9, 221.9; 3970.0, 133.7;

-2790.129295450 -2789.702658 -2789.657764 -2789.777498

$\eta^1\text{-NL} [\text{Co}(\text{H}_2\text{O})_7\text{N}_2\text{O}]^+$

|    |           |           |           |
|----|-----------|-----------|-----------|
| Co | -0.748363 | 0.109653  | -0.134584 |
| O  | 0.999545  | 0.313124  | 1.220965  |
| H  | 1.673206  | 0.823309  | 0.720605  |
| O  | 1.635993  | 3.796570  | -0.010849 |
| H  | 2.185985  | 4.576247  | 0.097938  |
| O  | 0.623557  | 0.791161  | -1.834977 |
| H  | 0.271213  | 1.629819  | -2.182537 |
| H  | 2.252045  | 3.045311  | -0.149277 |
| H  | 0.530151  | 0.105098  | -2.520697 |
| H  | 0.749446  | 0.887811  | 1.964395  |
| O  | -1.918227 | -0.460580 | 1.715252  |
| H  | -2.207319 | 0.328713  | 2.207189  |
| H  | -1.347570 | -0.992538 | 2.310121  |
| O  | -1.163893 | 2.322037  | 0.294159  |
| H  | -1.233890 | 2.825900  | -0.534084 |
| H  | -1.977031 | 2.433472  | 0.808783  |
| O  | -2.416985 | 2.084193  | 2.744733  |
| H  | -1.537244 | 2.409217  | 3.013913  |
| H  | -3.058630 | 2.422034  | 3.373440  |
| O  | 0.263629  | 2.673833  | 2.588974  |
| H  | 0.916824  | 3.259919  | 2.978643  |
| H  | 0.161159  | 2.944875  | 1.656847  |
| O  | -0.223531 | 3.429363  | -1.988997 |
| H  | -0.364315 | 4.083390  | -2.676948 |
| H  | 0.488034  | 3.759078  | -1.399495 |
| O  | 2.881492  | 1.424516  | -0.417215 |
| H  | 2.400159  | 1.010224  | -1.159494 |
| H  | 3.737109  | 0.963668  | -0.343219 |
| O  | -0.408396 | -2.201972 | -0.472334 |
| H  | -1.328465 | -2.497532 | -0.301074 |
| H  | 0.145284  | -2.767198 | 0.098400  |
| O  | 2.731724  | -1.818690 | 1.047519  |
| H  | 2.130802  | -1.109698 | 1.349568  |
| H  | 3.620555  | -1.435127 | 0.985646  |
| O  | 0.438445  | -1.678542 | -3.020654 |
| H  | 0.031121  | -2.040396 | -2.204872 |
| H  | 0.076324  | -2.156050 | -3.769909 |
| N  | -3.213722 | -0.341997 | -1.931703 |
| N  | -2.297425 | -0.074714 | -1.327780 |
| O  | -4.167526 | -0.618046 | -2.562430 |
| O  | -3.028132 | -2.478683 | 0.222320  |
| H  | -3.646319 | -3.138434 | 0.540798  |
| H  | -2.951707 | -1.783952 | 0.901645  |
| O  | 4.917754  | -0.481775 | -0.238729 |
| H  | 5.875392  | -0.509903 | -0.295981 |
| H  | 4.555547  | -0.900301 | -1.043639 |
| O  | 2.924589  | -1.362088 | -1.736767 |
| H  | 2.553847  | -1.698102 | -0.905500 |
| H  | 2.283751  | -1.579953 | -2.429144 |
| O  | 1.052521  | -3.805226 | 1.349768  |
| H  | 1.209131  | -4.751030 | 1.308834  |
| H  | 1.916533  | -3.343931 | 1.315604  |
| O  | -0.280604 | -2.125170 | 3.112975  |
| H  | 0.141867  | -2.843316 | 2.607968  |
| H  | -0.364781 | -2.436470 | 4.015973  |

---

24.5, 0.5; 30.7, 1.0; 38.4, 1.6; 39.9, 2.6; 49.9, 0.6; 55.1, 0.3; 59.2, 0.2; 68.4, 0.2; 73.5, 1.2; 76.5, 3.6; 79.0, 5.0; 84.0, 0.8; 89.6, 1.5; 94.4, 1.7; 95.8, 3.9; 105.9, 3.3; 109.4, 0.2; 112.1, 4.3; 113.8, 0.9; 123.8, 4.5; 130.3, 5.6; 135.1, 2.8; 143.0, 1.7; 145.7, 1.3; 151.8, 2.7; 168.5, 4.8; 172.2, 14.6; 177.9, 7.3; 182.2, 22.2; 185.8, 13.6; 186.9, 9.7; 192.7, 42.5; 193.6, 1.5; 204.8, 25.4; 208.6, 22.1; 219.0, 22.9; 221.9, 15.0; 232.6, 15.2; 233.5, 1.2; 240.6, 16.3; 244.8, 1.6; 250.9, 7.3; 264.6, 10.5; 270.1, 5.4; 275.5, 10.0; 284.7, 6.6; 286.2, 1.1; 289.1, 69.7; 294.0, 22.7; 302.5, 4.6; 303.4, 18.7; 306.5, 25.5; 311.2, 18.8; 318.1, 6.5; 324.8, 14.4; 327.8, 17.7; 331.7, 50.7; 339.0, 42.8; 348.5, 35.4; 358.5, 35.8; 373.8, 3.9; 380.9, 58.7; 385.0, 31.2; 407.1, 73.5; 422.0, 16.3; 433.1, 35.3; 438.8, 44.9; 448.6, 126.0; 453.5, 17.5; 466.1, 213.6; 475.8, 83.8; 488.5, 152.8; 496.6, 13.9; 506.2, 3.5; 507.9, 34.1; 521.2, 89.6; 533.0, 383.7; 541.5, 148.5; 562.7, 213.6; 571.8, 74.9; 588.7, 45.6; 610.9, 134.3; 625.4, 23.0; 629.4, 25.2; 646.1, 326.6; 654.2, 86.4; 662.4, 370.2; 687.6, 161.8; 715.2, 41.9; 720.9, 26.8; 743.5, 119.4; 753.2, 214.1; 762.9, 155.0; 778.6, 40.4; 792.6, 73.2; 806.5, 146.1; 812.2, 71.5; 829.6, 64.9; 846.1, 430.6; 860.7, 25.6; 869.0, 258.8; 877.2, 79.7; 903.5, 257.2; 922.6, 90.1; 929.8, 139.4; 959.7, 118.7; 1336.5, 462.4; 1573.0, 81.1; 1586.9, 236.5; 1587.5, 24.9; 1590.8, 120.5; 1595.2, 100.0; 1607.3, 182.9; 1608.4, 79.3; 1615.4, 75.9; 1626.5, 46.2; 1635.6, 97.6; 1636.4, 112.2; 1644.3, 56.0; 1646.3, 83.0; 1654.2, 18.4; 1660.4, 7.9; 1683.3, 13.3; 1688.2, 44.6; 2408.2, 254.5; 3489.0, 384.3; 3507.1, 278.1; 3515.1, 1045.3; 3535.9, 532.1; 3548.1, 345.2; 3571.6, 670.9; 3574.0, 252.6; 3615.1, 56.5; 3624.7, 626.1; 3628.3, 658.6; 3636.9, 516.3; 3651.5, 450.6; 3661.7, 631.9; 3667.7, 180.8; 3673.4, 259.8; 3693.9, 292.4; 3696.2, 199.1; 3697.9, 897.3; 3703.4, 121.7; 3725.3, 577.3; 3731.5, 674.5; 3735.4, 410.6; 3777.3, 884.8; 3811.1, 768.4; 3812.6, 368.7; 3937.5, 109.7; 3945.0, 181.6; 3949.9, 135.6; 3950.7, 202.8; 3951.1, 166.7; 3951.5, 81.2; 3952.1, 121.3; 3961.9, 134.6; 3965.9, 158.0;

-2866.569439760 -2866.116266 -2866.069241 -2866.193327

$\eta^1\text{-OL} [\text{CoN}_2\text{O}]^+$

|    |           |           |           |
|----|-----------|-----------|-----------|
| Co | -1.339725 | -0.079239 | -0.000011 |
| N  | 1.716044  | 0.056044  | 0.002306  |
| N  | 2.769542  | -0.301249 | -0.001225 |
| O  | 0.596685  | 0.481985  | -0.000910 |

---

100.1, 3.6; 274.3, 15.7; 566.9, 6.1; 586.5, 6.1; 1323.3, 161.5; 2442.6, 300.4;

-1566.969470190 -1566.957410 -1566.952089 -1566.986469

$\eta^1\text{-OL} [\text{Co}(\text{H}_2\text{O})_7\text{N}_2\text{O}]^+$

|    |           |           |           |
|----|-----------|-----------|-----------|
| Co | -0.744593 | -0.058961 | -0.000546 |
| N  | 2.243942  | 0.005997  | 0.000761  |
| N  | 3.256947  | 0.464211  | -0.008170 |
| O  | 1.172761  | -0.527966 | 0.010935  |
| O  | -2.666835 | 0.235905  | -0.004008 |
| H  | -3.339734 | -0.454167 | -0.043487 |
| H  | -3.109886 | 1.091145  | 0.054663  |

---

68.0, 3.5; 92.7, 2.5; 137.5, 1.1; 210.5, 2.6; 280.8, 5.4; 316.2, 283.0; 451.1, 11.6; 566.8, 5.9; 592.4, 3.1; 622.5, 68.4; 1325.3, 157.6; 1640.6, 102.4; 2447.7, 337.2; 3820.1, 181.4; 3911.7, 287.5;

-1643.456937650 -1643.419384 -1643.411239 -1643.452139

$\eta^1\text{-OL} [\text{Co}(\text{H}_2\text{O})_7\text{N}_2\text{O}]^+$

|    |          |           |           |
|----|----------|-----------|-----------|
| Co | 1.007823 | -0.004545 | 0.065040  |
| O  | 1.101852 | 1.951823  | 0.038447  |
| H  | 0.419252 | 2.515898  | -0.341338 |
| O  | 1.110014 | -1.960178 | 0.018895  |
| H  | 0.444905 | -2.530821 | -0.381171 |
| H  | 1.864860 | 2.501209  | 0.247583  |
| H  | 1.873618 | -2.502476 | 0.244393  |

N -2.319071 0.005482 -0.055341  
 N -3.341599 -0.048604 0.390350  
 O -1.235511 0.063450 -0.541168  
 ---  
 284.6, 18.0; 18.2, 2.1; 50.8, 0.9; 83.2, 10.9; 113.2,  
 7.5; 124.8, 20.2; 169.0, 0.1; 234.8, 0.9; 292.4, 21.9;  
 318.5, 468.8; 356.0, 0.1; 469.4, 9.7; 562.9, 0.3;  
 591.8, 6.0; 601.4, 8.8; 606.3, 146.8; 1335.8, 124.1;  
 1633.4, 83.4; 1635.4, 129.0; 2413.9, 376.1; 3836.2,  
 251.4; 3839.0, 10.4; 3930.4, 43.8; 3931.6, 471.8;  
 -1719.920252700 -1719.858404 -1719.847499 -  
 1719.896949

$\eta^1$ -OL [Co(H<sub>2</sub>O)<sub>5</sub>N<sub>2</sub>O]<sup>+</sup>  
 Co 0.633761 -0.006926 -0.070104  
 O 0.592952 -2.010971 -0.174540  
 O 0.604514 1.995883 -0.196616  
 O 2.753670 0.029415 0.478316  
 H 3.107965 0.011854 1.372802  
 H 3.504170 -0.000045 -0.123086  
 H 1.357180 -2.579709 -0.038930  
 H -0.117835 -2.545242 -0.542377  
 H 1.380440 2.547875 -0.057014  
 H -0.091366 2.543089 -0.573348  
 N -2.693880 0.006715 0.086493  
 N -3.654641 0.040206 0.656851  
 O -1.677692 -0.029235 -0.525739  
 ---

8.8, 4.2; 33.8, 0.2; 50.7, 15.6; 63.4, 1.8; 73.7, 3.9;  
 99.3, 15.2; 124.9, 12.5; 143.8, 5.8; 194.3, 3.4; 247.3,  
 15.7; 259.1, 42.5; 262.7, 96.7; 274.7, 125.0; 289.3,  
 363.6; 321.7, 2.3; 337.9, 13.3; 412.8, 23.9; 437.2,  
 100.4; 517.2, 6.9; 558.7, 165.8; 593.5, 6.5; 604.1,  
 4.9; 1343.4, 119.1; 1617.2, 89.8; 1619.2, 165.9;  
 1622.2, 55.6; 2417.9, 451.8; 3847.7, 157.0; 3848.6,  
 58.9; 3849.5, 18.9; 3950.0, 9.4; 3951.1, 406.5; 3955.7,  
 182.3;  
 -1796.371651430 -1796.285237 -1796.270197 -  
 1796.329884

$\eta^1$ -OL [Co(H<sub>2</sub>O)<sub>4</sub>N<sub>2</sub>O]<sup>+</sup>  
 Co -0.143882 0.428115 -0.174164  
 O 0.517764 2.282148 0.261748  
 O -0.756033 -1.456017 -0.482588  
 O -2.183696 1.113387 0.099634  
 H -2.812041 0.397531 0.289590  
 H -2.598840 1.673957 -0.562306  
 H -0.027320 2.944972 0.696974  
 H 1.406737 2.635243 0.162497  
 H -1.667482 -1.714925 -0.254613  
 H -0.276738 -2.215985 -0.820824  
 N 2.958042 -0.742262 0.107075  
 N 3.757187 -1.279717 0.675908  
 O 2.114886 -0.172225 -0.500607  
 O -3.376147 -1.466770 0.431038  
 H -3.544376 -1.781218 1.326291  
 H -4.135931 -1.749001 -0.089859  
 ---

9.0, 0.4; 24.2, 1.1; 39.2, 6.2; 56.6, 0.3; 65.9, 0.4;  
 92.2, 2.9; 101.6, 9.5; 122.5, 3.4; 136.7, 2.2; 161.3,  
 2.4; 206.1, 15.6; 223.9, 131.9; 249.7, 54.2; 256.5,  
 127.7; 273.4, 25.6; 288.1, 21.1; 310.1, 45.4; 329.8,  
 3.2; 347.0, 69.0; 411.2, 19.9; 465.9, 106.3; 512.6,  
 56.5; 547.6, 46.8; 592.5, 6.9; 605.5, 13.9; 617.5,  
 377.9; 693.7, 71.2; 713.3, 154.1; 1346.0, 107.8;  
 1604.9, 126.0; 1614.9, 104.8; 1627.5, 91.9; 1649.4,  
 30.7; 2415.2, 465.5; 3652.4, 423.6; 3723.9, 585.2;  
 3842.1, 39.6; 3851.5, 76.9; 3919.6, 181.0; 3935.0,  
 178.0; 3941.9, 178.6; 3956.5, 212.0;  
 -1872.816985030 -1872.704158 -1872.687789 -  
 1872.749131

$\eta^1$ -OL [Co(H<sub>2</sub>O)<sub>3</sub>N<sub>2</sub>O]<sup>+</sup>  
 Co 0.054568 -0.000107 -0.149284  
 O -2.580332 -2.784791 0.148270  
 H -3.120606 -3.206660 -0.527937  
 O 0.055695 -2.005830 -0.253732  
 H -0.787762 -2.488472 -0.176776  
 O -2.005070 -0.000331 0.423730  
 H -2.547543 0.791389 0.304481

O 0.054802 2.005585 -0.253725  
 H 0.717382 2.573846 -0.653146  
 H -2.794530 -3.234794 0.972601  
 H -0.788306 2.488751 -0.176651  
 H 0.717665 -2.574270 -0.653893  
 H -2.547501 -0.792105 0.304655  
 O -2.581620 2.784131 0.148739  
 H -3.122034 3.205450 -0.527698  
 H -2.796149 3.234385 0.972842  
 N 3.333880 0.000594 0.159199  
 O 2.393181 0.002092 -0.561311  
 N 4.223663 -0.000808 0.837435  
 ---

24.2, 0.2; 26.8, 3.3; 43.0, 0.1; 50.5, 18.2; 58.8, 0.3;  
 64.0, 0.4; 87.0, 4.4; 104.9, 0.2; 108.7, 0.8; 136.0,  
 1.9; 144.2, 1.5; 180.7, 0.2; 205.6, 25.1; 216.6, 24.9;  
 227.5, 53.7; 230.3, 15.4; 248.5, 41.6; 270.0, 8.7;  
 280.4, 25.5; 299.3, 123.2; 303.8, 3.3; 342.0, 0.3;  
 415.7, 26.4; 447.6, 99.3; 466.1, 167.0; 550.8, 142.0;  
 565.5, 195.0; 593.9, 12.5; 604.6, 4.7; 617.1, 3.5;  
 650.0, 299.4; 677.5, 157.9; 733.0, 257.9; 746.6, 0.3;  
 1346.3, 106.2; 1578.3, 73.9; 1603.2, 231.5; 1605.2,  
 56.6; 1634.5, 1.6; 1646.4, 36.5; 2413.3, 490.1; 3647.6,  
 228.3; 3652.7, 892.5; 3750.2, 242.7; 3834.3, 543.9;  
 3847.6, 37.7; 3863.2, 239.2; 3936.1, 23.5; 3937.0,  
 345.5; 3949.7, 0.7; 3950.0, 338.3;

-1949.262221890 -1949.123444 -1949.103622 -  
 1949.173751

$\eta^1$ -OL [Co(H<sub>2</sub>O)<sub>6</sub>N<sub>2</sub>O]<sup>+</sup>  
 Co -0.464927 -0.255080 -0.091923  
 O 1.098350 -1.399607 -1.013329  
 H 1.870433 -1.682658 -0.495312  
 O 0.918769 0.109666 1.516293  
 H 0.524370 0.333044 2.363286  
 O -1.741240 1.251776 0.779774  
 H -2.695955 1.116456 0.668630  
 O -2.130853 -1.299149 -0.754290  
 H -2.181943 -2.208505 -1.056343  
 H 1.150188 -1.798566 -1.884108  
 H -3.018935 -1.007394 -0.488249  
 H 1.651516 -0.508104 1.671412  
 H -1.554017 2.161384 0.530691  
 O -4.320318 0.151035 0.242706  
 H -4.839762 -0.135462 1.001276  
 H -4.949309 0.544917 -0.370938  
 O 3.146952 -1.462368 0.900361  
 H 3.813740 -0.812004 0.647680  
 H 3.621827 -2.187057 1.319202  
 N 2.041383 1.548480 -0.661022  
 N 3.110348 1.268784 -0.469106  
 O 0.915685 1.817431 -0.860815  
 ---

36.3, 16.8; 29.5, 10.2; 47.2, 2.2; 53.4, 2.0; 63.7,  
 1.5; 79.1, 0.8; 80.5, 2.2; 95.0, 5.3; 99.3, 1.4; 113.4,  
 4.0; 125.9, 0.9; 133.7, 1.0; 155.1, 4.2; 165.3, 35.1;  
 186.8, 48.6; 205.1, 33.1; 217.8, 3.9; 232.4, 60.6;  
 238.9, 19.5; 248.8, 44.5; 272.4, 27.3; 281.6, 69.0;  
 300.9, 11.1; 306.8, 21.9; 322.5, 9.1; 331.6, 26.7;  
 347.6, 13.8; 384.9, 97.7; 441.1, 19.2; 448.2, 278.9;  
 517.2, 126.9; 547.1, 75.9; 573.8, 235.4; 588.5, 145.3;  
 604.1, 16.3; 611.5, 12.7; 686.2, 61.0; 688.9, 110.1;  
 696.3, 106.5; 724.2, 200.5; 1379.5, 56.5; 1593.1,  
 115.5; 1596.9, 198.1; 1603.9, 89.2; 1615.0, 112.9;  
 1637.2, 25.1; 1645.4, 7.4; 2420.8, 433.5; 3693.1,  
 235.5; 3698.3, 153.6; 3730.6, 1040.7; 3735.7, 153.2;  
 3830.6, 29.7; 3848.5, 35.7; 3924.0, 186.0; 3938.0,  
 186.8; 3942.4, 187.8; 3944.5, 193.6; 3950.7, 151.9;  
 3951.4, 172.4;

-2025.705702410 -2025.541844 -2025.519930 -  
 2025.592499

$\eta^1$ -OL [Co(H<sub>2</sub>O)<sub>7</sub>N<sub>2</sub>O]<sup>+</sup>  
 Co 0.074603 -0.174207 0.228104  
 O -1.166782 0.543598 -1.600783  
 H -1.468357 1.431919 -1.329384  
 O -0.378887 -2.300639 -0.111164  
 H -1.315399 -2.379775 -0.360758  
 O 0.754135 1.894663 0.415589  
 H 1.345034 2.253441 1.082144  
 O 1.353196 -1.079454 1.785446



|   |           |           |           |
|---|-----------|-----------|-----------|
| H | 1.117390  | -2.009287 | 1.870479  |
| O | -2.919283 | -1.407875 | -0.750622 |
| H | -2.524781 | -0.761891 | -1.365143 |
| H | -3.758307 | -1.698087 | -1.118021 |
| H | 1.688051  | -0.795658 | 2.639984  |
| H | -0.012980 | 2.490189  | 0.362977  |
| H | 0.124438  | -2.761415 | -0.788555 |
| H | -0.622102 | 0.658370  | -2.385550 |
| O | -1.962745 | 0.116696  | 1.319673  |
| H | -2.540581 | -0.495136 | 0.822499  |
| H | -2.008776 | -0.141212 | 2.244679  |
| N | 2.893912  | 0.070060  | -0.784525 |
| N | 3.793480  | 0.571657  | -0.345696 |
| O | 1.933486  | -0.454014 | -1.233940 |
| O | -1.885894 | 2.585668  | 0.079107  |
| H | -2.496915 | 3.324967  | 0.133575  |
| H | -2.170549 | 1.906005  | 0.717363  |

---  
 35.6, 0.5; 49.6, 1.5; 53.6, 0.7; 65.9, 0.9; 79.5, 1.0;  
 81.6, 1.1; 84.8, 0.4; 94.3, 3.9; 106.6, 0.2; 120.1,  
 2.9; 131.2, 0.2; 138.3, 0.9; 159.7, 3.2; 180.3, 4.0;  
 192.0, 8.6; 203.2, 1.2; 217.0, 11.8; 228.3, 8.6; 236.2,  
 30.0; 248.8, 19.5; 262.8, 33.3; 270.0, 2.4; 278.5, 5.2;  
 284.6, 4.9; 303.0, 22.0; 322.4, 197.3; 368.7, 16.5;  
 381.6, 76.1; 393.1, 17.4; 396.6, 168.8; 410.8, 90.2;  
 421.7, 55.7; 432.5, 55.9; 445.4, 50.8; 473.5, 84.0;  
 481.4, 196.5; 519.3, 162.4; 536.8, 164.4; 598.6, 6.6;  
 605.1, 5.0; 628.0, 439.3; 712.8, 191.9; 753.0, 56.5;  
 768.6, 189.0; 794.8, 56.2; 854.8, 84.0; 1348.5, 76.0;  
 1575.2, 172.2; 1589.0, 108.2; 1602.1, 104.5; 1626.7,  
 157.9; 1627.1, 1.4; 1629.4, 16.8; 1638.6, 56.8; 2412.5,  
 426.9; 3596.2, 103.7; 3636.3, 490.8; 3659.6, 349.3;  
 3669.7, 105.1; 3710.2, 428.5; 3722.0, 672.9; 3845.7,  
 42.4; 3914.3, 129.3; 3919.5, 231.9; 3923.2, 143.0;  
 3933.1, 189.4; 3937.4, 182.3; 3940.3, 118.4; 3961.1,  
 145.7;

-2102.151480100 -2101.960518 -2101.936328 -  
 2102.012786

$\eta^1$ -OL [Co(H<sub>2</sub>O)<sub>9</sub>N<sub>2</sub>O]<sup>+</sup>

|    |           |           |           |
|----|-----------|-----------|-----------|
| Co | 0.062659  | -0.155602 | 0.291327  |
| O  | -0.710718 | -1.773967 | -1.169479 |
| H  | -0.823986 | -1.268854 | -2.000938 |
| O  | -0.755152 | -1.180087 | 2.069449  |
| H  | -1.658744 | -1.448612 | 1.811519  |
| O  | 0.953726  | 1.161017  | -1.179049 |
| H  | 0.663899  | 2.049836  | -0.917009 |
| O  | 0.511754  | 1.327920  | 2.075887  |
| H  | -0.001195 | 0.752422  | 2.661507  |
| O  | -2.959256 | -1.597188 | 0.520616  |
| H  | -2.382310 | -1.898708 | -0.204328 |
| H  | -3.754409 | -2.136035 | 0.508233  |
| H  | 1.409031  | 1.334595  | 2.424189  |
| H  | 0.532814  | 1.002259  | -2.038401 |
| H  | -0.328761 | -1.960093 | 2.435803  |
| H  | -0.179689 | -2.547564 | -1.378133 |
| O  | -1.924318 | 0.844671  | -0.276378 |
| H  | -2.672545 | 0.413427  | 0.161576  |
| H  | -1.846340 | 1.771653  | 0.011661  |
| N  | 3.062917  | -0.788498 | -0.178301 |
| N  | 3.856755  | -0.608384 | -0.945693 |
| O  | 2.220888  | -0.982364 | 0.633201  |
| H  | -1.151035 | 0.295298  | -2.860226 |
| O  | -1.578350 | 0.472777  | -3.701966 |
| H  | -1.708427 | 0.662656  | -2.149257 |
| O  | -0.557523 | 3.138477  | 0.295925  |
| H  | -0.170806 | 2.818150  | 1.128836  |
| H  | -0.656617 | 4.091297  | 0.369255  |

---  
 20.5, 0.2; 45.2, 0.3; 47.0, 0.9; 66.7, 1.3; 76.2, 1.3;  
 83.4, 4.7; 88.2, 3.4; 100.1, 1.3; 105.0, 5.3; 117.2,  
 1.2; 122.6, 0.5; 139.5, 1.5; 150.4, 0.4; 157.5, 0.3;  
 167.1, 6.8; 183.3, 0.8; 195.5, 4.4; 198.0, 8.0; 218.1,  
 15.3; 236.7, 15.5; 240.3, 5.0; 252.9, 6.5; 269.5, 11.7;  
 280.7, 8.2; 285.4, 3.7; 310.3, 27.2; 331.6, 10.5;  
 355.1, 5.9; 367.4, 88.0; 379.5, 73.2; 386.8, 22.1;  
 397.0, 73.0; 406.8, 51.0; 417.3, 144.0; 430.6, 37.9;  
 442.0, 105.2; 460.6, 14.5; 473.0, 260.6; 510.6, 114.7;  
 534.3, 110.9; 546.4, 268.5; 589.9, 8.4; 611.4, 2.2;  
 635.5, 357.2; 645.3, 382.5; 678.0, 58.8; 722.3, 15.3;  
 739.3, 161.0; 766.5, 52.7; 815.1, 240.7; 844.5, 61.3;  
 885.1, 48.7; 1340.9, 90.5; 1540.9, 141.7; 1577.9, 91.1;

1586.4, 198.2; 1593.9, 15.7; 1626.0, 84.5; 1635.3,  
 49.4; 1639.3, 15.6; 1664.9, 61.5; 2411.0, 449.8;  
 3574.0, 359.0; 3619.0, 344.9; 3647.2, 411.7; 3681.1,  
 113.1; 3685.0, 354.4; 3700.0, 63.5; 3731.9, 498.0;  
 3784.9, 65.0; 3795.6, 394.1; 3820.8, 625.0; 3914.6,  
 96.4; 3921.8, 137.2; 3922.6, 232.8; 3939.9, 167.2;  
 3940.5, 184.8; 3942.0, 161.0;

-2178.593834650 -2178.375661 -2178.349758 -  
 2178.430175

$\eta^1$ -OL [Co(H<sub>2</sub>O)<sub>9</sub>N<sub>2</sub>O]<sup>+</sup>

|    |           |           |           |
|----|-----------|-----------|-----------|
| Co | 0.261964  | 0.379426  | -0.275501 |
| O  | 0.220861  | -0.662158 | -2.268063 |
| H  | 0.065918  | -1.616311 | -2.147565 |
| O  | 0.688259  | -1.457336 | 0.761670  |
| H  | 0.157303  | -1.547678 | 1.568679  |
| O  | -0.347282 | 1.365650  | 1.741319  |
| H  | 0.406617  | 1.628705  | 2.278168  |
| O  | 0.363452  | 2.302375  | -1.300077 |
| H  | 1.201859  | 2.762992  | -1.383998 |
| H  | 0.849403  | -0.551917 | -2.985734 |
| H  | -0.283678 | 2.934727  | -0.945958 |
| H  | 0.473031  | -2.231068 | 0.214192  |
| H  | -0.775414 | 0.615882  | 2.202784  |
| O  | -0.571046 | -3.063371 | -1.126496 |
| H  | -0.601138 | -3.986748 | -1.389747 |
| H  | -1.440193 | -2.836826 | -0.742730 |
| O  | -1.863518 | 3.022533  | 0.139334  |
| H  | -1.462105 | 2.644033  | 0.943756  |
| H  | -2.431952 | 3.751151  | 0.400280  |
| O  | -2.707886 | -1.803250 | 0.166742  |
| H  | -3.633021 | -2.051328 | 0.081541  |
| H  | -2.600954 | -0.942707 | -0.298133 |
| O  | -1.441184 | -1.052469 | 2.528902  |
| H  | -2.043931 | -1.378128 | 1.829980  |
| H  | -1.779279 | -1.367784 | 3.371133  |
| O  | -1.971374 | 0.512681  | -1.000055 |
| H  | -2.216644 | 1.432694  | -0.788010 |
| H  | -1.666013 | 0.488255  | -1.916805 |
| N  | 3.309062  | -0.115858 | 0.462423  |
| N  | 4.003326  | -0.989548 | 0.547097  |
| O  | 2.569772  | 0.803521  | 0.366731  |

---  
 22.5, 0.2; 41.5, 0.0; 50.5, 0.1; 57.6, 0.6; 67.0, 0.2;  
 71.3, 0.1; 82.6, 0.7; 86.5, 1.7; 100.3, 0.6; 102.7,  
 2.2; 110.9, 1.1; 119.3, 1.9; 127.5, 3.6; 134.7, 0.2;  
 157.9, 1.8; 173.4, 8.8; 184.5, 5.0; 185.5, 2.7; 198.2,  
 7.3; 216.8, 7.9; 233.3, 14.6; 234.2, 5.5; 237.4, 7.6;  
 246.0, 0.9; 264.8, 24.9; 280.8, 1.0; 285.5, 23.2;  
 299.6, 21.1; 308.9, 49.6; 319.6, 48.9; 330.7, 13.4;  
 342.3, 19.2; 359.8, 65.5; 388.0, 64.0; 389.4, 32.0;  
 400.2, 51.4; 422.3, 21.6; 443.4, 42.2; 446.4, 16.8;  
 482.3, 155.7; 484.2, 240.5; 516.1, 46.0; 524.0, 118.2;  
 544.6, 214.4; 562.0, 46.5; 578.0, 188.4; 598.2, 12.0;  
 606.5, 3.2; 636.9, 244.1; 666.2, 137.5; 697.7, 83.0;  
 717.8, 518.8; 744.6, 18.9; 790.3, 337.1; 806.2, 36.3;  
 811.1, 12.3; 850.4, 33.3; 941.2, 159.0; 1347.0, 83.3;  
 1579.3, 118.9; 1595.0, 146.4; 1608.2, 74.8; 1615.4,  
 3.8; 1618.8, 138.1; 1627.1, 108.3; 1635.9, 41.8;  
 1642.1, 42.5; 1673.0, 4.7; 2412.5, 440.3; 3486.8,  
 455.9; 3565.9, 521.2; 3604.4, 585.3; 3638.4, 744.6;  
 3645.4, 162.6; 3666.3, 3.6; 3669.2, 245.4; 3711.7,  
 545.0; 3721.8, 420.0; 3777.7, 680.9; 3847.4, 259.5;  
 3908.4, 132.3; 3920.3, 133.9; 3934.1, 125.0; 3934.6,  
 216.8; 3939.2, 74.2; 3939.7, 283.0; 3944.6, 113.8;

-2255.039344540 -2254.794914 -2254.766696 -  
 2254.852177

$\eta^1$ -OL [Co(H<sub>2</sub>O)<sub>10</sub>N<sub>2</sub>O]<sup>+</sup>

|    |           |           |           |
|----|-----------|-----------|-----------|
| Co | 0.238355  | 0.341105  | -0.128857 |
| O  | -0.929397 | 0.026464  | 2.115847  |
| H  | -0.645073 | -0.897412 | 2.271092  |
| O  | -0.919478 | -1.677511 | -0.449917 |
| H  | -0.410305 | -2.117014 | -1.149839 |
| O  | 0.509515  | 0.387071  | -2.329804 |
| H  | -0.235450 | 0.519705  | -2.924899 |
| O  | -0.119047 | 2.475733  | 0.102742  |
| H  | 0.147471  | 2.686333  | 1.011128  |
| H  | -1.868998 | 0.061864  | 2.320266  |
| H  | 0.598701  | 2.813030  | -0.455018 |
| H  | -0.821777 | -2.238647 | 0.336045  |

|     |                                                                                 |           |           |     |                                                         |           |           |
|-----|---------------------------------------------------------------------------------|-----------|-----------|-----|---------------------------------------------------------|-----------|-----------|
| H   | 0.825652                                                                        | -0.527967 | -2.468693 | O   | -2.213236                                               | -2.240269 | -1.716819 |
| O   | 0.052967                                                                        | -2.561170 | 2.004186  | H   | -2.908327                                               | -1.600759 | -1.477839 |
| H   | -0.014943                                                                       | -3.303425 | 2.610350  | H   | -2.641945                                               | -3.001800 | -2.111653 |
| H   | 0.948614                                                                        | -2.581152 | 1.610103  | O   | -3.550075                                               | -0.097643 | -0.677120 |
| O   | 2.257985                                                                        | 2.279043  | -1.434317 | H   | -4.451562                                               | 0.231666  | -0.657991 |
| H   | 1.787940                                                                        | 1.719432  | -2.078600 | H   | -3.200132                                               | -0.066886 | 0.233707  |
| H   | 2.918162                                                                        | 2.791134  | -1.907464 | --- |                                                         |           |           |
| O   | 2.352215                                                                        | -2.201927 | 0.479696  |     | 31.0, 1.6; 37.1, 0.2; 44.2, 0.3; 46.4, 1.2; 65.2, 1.5;  |           |           |
| H   | 3.226698                                                                        | -2.528458 | 0.710328  |     | 68.1, 1.2; 73.4, 0.3; 80.7, 1.2; 85.0, 1.4; 90.9, 2.6;  |           |           |
| H   | 2.378434                                                                        | -1.220155 | 0.576862  |     | 93.5, 0.6; 99.5, 1.4; 107.8, 0.8; 109.7, 2.2; 121.5,    |           |           |
| O   | 1.255425                                                                        | -2.269179 | -2.088889 |     | 0.7; 135.9, 0.4; 148.0, 1.4; 157.7, 2.1; 162.1, 0.9;    |           |           |
| H   | 1.789068                                                                        | -2.370542 | -1.275086 |     | 183.4, 1.8; 188.6, 9.3; 196.7, 3.6; 209.8, 4.8; 218.2,  |           |           |
| H   | 1.562130                                                                        | -2.925330 | -2.720084 |     | 7.3; 225.0, 18.1; 231.3, 26.5; 240.0, 64.6; 248.0,      |           |           |
| O   | 2.000550                                                                        | 0.445619  | 0.628863  |     | 10.4; 254.7, 2.9; 266.0, 38.3; 271.5, 15.6; 277.7,      |           |           |
| H   | 2.349125                                                                        | 1.080774  | -0.026860 |     | 13.7; 295.8, 21.5; 296.5, 12.2; 308.8, 23.2; 319.2,     |           |           |
| H   | 1.886713                                                                        | 0.955988  | 1.453829  |     | 12.0; 323.7, 21.3; 327.8, 15.8; 337.2, 46.3; 376.4,     |           |           |
| N   | -3.256645                                                                       | 0.163346  | -0.624477 |     | 31.4; 377.8, 26.0; 398.4, 14.0; 406.2, 26.6; 423.8,     |           |           |
| N   | -4.033572                                                                       | -0.340961 | 0.007251  |     | 39.1; 430.8, 23.1; 451.5, 120.6; 465.7, 125.2; 481.7,   |           |           |
| O   | -2.426129                                                                       | 0.696389  | -1.269116 |     | 154.8; 496.8, 11.2; 514.9, 244.1; 518.2, 94.2; 544.0,   |           |           |
| O   | 0.927185                                                                        | 1.952800  | 2.683970  |     | 42.9; 553.3, 50.9; 595.4, 89.0; 597.2, 5.1; 604.0, 4.0; |           |           |
| H   | 0.196163                                                                        | 1.327349  | 2.837501  |     | 642.2, 152.3; 654.5, 369.4; 667.0, 210.7; 689.9, 128.9; |           |           |
| H   | 1.154469                                                                        | 2.361325  | 3.522674  |     | 711.3, 534.3; 743.3, 220.7; 765.5, 20.3; 788.7, 32.7;   |           |           |
| --- |                                                                                 |           |           |     | 798.3, 32.1; 810.2, 87.2; 838.4, 158.0; 873.9, 100.2;   |           |           |
|     | 25.7, 0.3; 37.5, 0.0; 51.5, 0.5; 58.2, 0.0; 69.3, 0.0;                          |           |           |     | 923.6, 150.4; 1011.3, 98.4; 1346.9, 80.8; 1578.6,       |           |           |
|     | 73.5, 1.0; 84.7, 0.8; 88.6, 2.4; 96.1, 1.1; 97.6, 1.8;                          |           |           |     | 161.5; 1592.4, 161.8; 1596.7, 106.8; 1603.3, 22.7;      |           |           |
|     | 108.6, 2.3; 115.5, 1.7; 124.3, 0.2; 136.2, 1.3; 148.5,                          |           |           |     | 1620.5, 144.5; 1623.0, 49.2; 1626.6, 43.5; 1637.3,      |           |           |
|     | 0.4; 153.4, 3.8; 175.7, 2.5; 177.8, 4.3; 185.4, 7.5;                            |           |           |     | 20.7; 1649.8, 39.6; 1659.6, 11.5; 1674.9, 17.4; 2418.8, |           |           |
|     | 190.6, 3.5; 195.1, 5.7; 216.0, 15.0; 224.5, 6.3; 238.5,                         |           |           |     | 404.1; 3415.9, 1076.2; 3486.3, 198.4; 3539.7, 839.3;    |           |           |
|     | 5.3; 243.0, 5.2; 246.7, 13.5; 264.5, 14.8; 276.9, 6.7;                          |           |           |     | 3590.6, 890.7; 3596.8, 172.7; 3632.1, 119.7; 3654.7,    |           |           |
|     | 289.4, 16.1; 292.1, 4.5; 314.8, 82.8; 338.2, 10.4;                              |           |           |     | 338.9; 3664.2, 671.4; 3674.0, 314.6; 3695.9, 12.3;      |           |           |
|     | 338.6, 2.7; 344.2, 16.4; 356.7, 28.9; 366.9, 69.1;                              |           |           |     | 3724.6, 421.2; 3738.4, 456.9; 3795.7, 983.7; 3808.2,    |           |           |
|     | 380.0, 3.2; 396.7, 2.9; 401.1, 1.0; 416.8, 62.5; 433.5,                         |           |           |     | 405.3; 3909.3, 60.2; 3913.0, 228.3; 3925.0, 116.5;      |           |           |
|     | 82.9; 443.6, 5.7; 463.8, 128.8; 472.6, 161.5; 511.7,                            |           |           |     | 3939.0, 174.3; 3942.5, 215.4; 3944.4, 87.2; 3948.6,     |           |           |
|     | 86.4; 528.7, 83.1; 554.0, 5.1; 561.6, 56.4; 598.1, 7.3;                         |           |           |     | 167.6; 3960.2, 163.2;                                   |           |           |
|     | 603.8, 20.1; 605.0, 161.2; 646.3, 60.2; 666.7, 743.4;                           |           |           |     |                                                         |           |           |
|     | 683.0, 226.0; 693.9, 410.9; 732.8, 6.3; 751.1, 209.4;                           |           |           |     |                                                         |           |           |
|     | 784.9, 124.4; 788.9, 139.7; 824.5, 3.4; 846.1, 15.1;                            |           |           |     |                                                         |           |           |
|     | 857.8, 84.0; 858.8, 138.0; 974.1, 128.4; 1364.0, 66.3;                          |           |           |     |                                                         |           |           |
|     | 1572.3, 17.7; 1579.6, 200.4; 1605.6, 65.2; 1624.9, 8.1;                         |           |           |     |                                                         |           |           |
|     | 1628.1, 184.7; 1634.0, 77.6; 1640.4, 17.6; 1655.7,                              |           |           |     |                                                         |           |           |
|     | 44.1; 1678.6, 5.6; 1696.0, 83.7; 2411.1, 417.0; 3425.4,                         |           |           |     |                                                         |           |           |
|     | 696.9; 3555.2, 165.2; 3590.2, 1130.1; 3607.4, 318.9;                            |           |           |     |                                                         |           |           |
|     | 3611.2, 387.3; 3635.2, 405.9; 3643.7, 444.0; 3677.2,                            |           |           |     |                                                         |           |           |
|     | 369.0; 3687.2, 50.9; 3715.1, 316.6; 3735.5, 414.2;                              |           |           |     |                                                         |           |           |
|     | 3779.0, 639.8; 3807.4, 580.9; 3905.4, 107.9; 3907.3,                            |           |           |     |                                                         |           |           |
|     | 169.7; 3919.5, 119.8; 3933.4, 190.3; 3936.2, 135.5;                             |           |           |     |                                                         |           |           |
|     | 3945.4, 70.5; 3945.9, 276.4;                                                    |           |           |     |                                                         |           |           |
|     | -2331.481667200 -2331.209933 -2331.179889 -                                     |           |           |     |                                                         |           |           |
|     | 2331.268814                                                                     |           |           |     |                                                         |           |           |
|     | $\eta^1$ -OL [Co(H <sub>2</sub> O) <sub>11</sub> N <sub>2</sub> O] <sup>+</sup> |           |           |     |                                                         |           |           |
| Co  | -0.015794                                                                       | 0.258868  | 0.355538  | Co  | -0.598956                                               | -0.265338 | -0.401265 |
| O   | -1.046112                                                                       | 0.908393  | -1.426499 | O   | -1.067542                                               | 0.046416  | -2.529517 |
| H   | -0.579856                                                                       | 0.549239  | -2.198910 | H   | -1.290877                                               | 0.990545  | -2.620373 |
| O   | 1.764077                                                                        | 1.147182  | -0.568747 | O   | 2.643253                                                | 1.217428  | 1.099856  |
| H   | 2.597367                                                                        | 0.744426  | -0.284146 | H   | 2.532033                                                | 0.304106  | 1.422147  |
| O   | 1.294321                                                                        | -0.211898 | 2.213150  | O   | -2.372085                                               | 1.222392  | 0.253163  |
| H   | 1.470219                                                                        | 0.604987  | 2.690086  | H   | -2.073185                                               | 1.520891  | 1.140246  |
| O   | -1.975778                                                                       | -0.010394 | 1.607253  | H   | 3.437447                                                | 1.172735  | 0.528254  |
| H   | -2.055624                                                                       | 0.754400  | 2.185692  | H   | -3.268940                                               | 0.895480  | 0.365730  |
| H   | -1.981447                                                                       | 0.663723  | -1.494684 | H   | -1.775920                                               | -0.447743 | -2.948968 |
| H   | -1.764998                                                                       | -0.774347 | 2.178961  | O   | 1.305617                                                | -1.846288 | -0.958258 |
| H   | 1.712627                                                                        | 1.015772  | -1.530410 | H   | 0.554264                                                | -2.417236 | -1.143436 |
| H   | 2.139158                                                                        | -0.463688 | 1.782493  | H   | 1.535834                                                | -1.391483 | -1.796711 |
| O   | 1.090224                                                                        | -0.025678 | -2.999726 | O   | -0.441950                                               | -0.706521 | -1.692625 |
| H   | 1.295303                                                                        | 0.036079  | -3.935817 | H   | -0.614384                                               | 0.070357  | 2.251570  |
| H   | 1.464486                                                                        | -0.864877 | -2.674346 | H   | 0.425747                                                | -1.063035 | 1.948116  |
| O   | -0.603095                                                                       | -2.093120 | 2.758450  | O   | 0.747510                                                | 1.456031  | -0.834149 |
| H   | 0.198157                                                                        | -1.544767 | 2.863916  | H   | 0.247945                                                | 2.267905  | -1.014876 |
| H   | -0.648483                                                                       | -2.705645 | 3.496672  | H   | 1.367983                                                | 1.588944  | -0.086860 |
| O   | 2.109261                                                                        | -2.141085 | -1.420907 | O   | -1.157528                                               | 1.815479  | 2.630830  |
| H   | 2.333848                                                                        | -3.013216 | -1.756680 | H   | -1.555103                                               | 2.050218  | 3.472897  |
| H   | 1.283357                                                                        | -2.241101 | -0.891678 | H   | -0.368191                                               | 2.396705  | 2.512003  |
| O   | 3.441130                                                                        | -0.793122 | 0.582635  | O   | -1.474734                                               | 2.718422  | -1.853415 |
| H   | 3.160313                                                                        | -1.390330 | -0.141096 | H   | -2.017588                                               | 2.434031  | -1.094144 |
| H   | 4.364416                                                                        | -0.977874 | 0.771812  | H   | -1.829956                                               | 3.548368  | -2.179562 |
| O   | -0.167501                                                                       | -1.991673 | -0.001039 | O   | 2.329877                                                | 0.055056  | -2.542145 |
| H   | -0.369553                                                                       | -2.377242 | 0.867898  | H   | 2.218516                                                | 0.108831  | -3.494731 |
| H   | -0.934839                                                                       | -2.172607 | -0.593257 | H   | 1.710613                                                | 0.704128  | -2.143775 |
| N   | -0.040894                                                                       | 3.323708  | 0.231962  | N   | -2.664745                                               | -2.296326 | 0.644713  |
| N   | 0.165960                                                                        | 4.043969  | -0.598029 | N   | -3.303328                                               | -2.326633 | 1.564390  |
| O   | -0.259653                                                                       | 2.553268  | 1.104394  | O   | -1.996188                                               | -2.240930 | -0.328846 |
|     |                                                                                 |           |           | O   | -0.410678                                               | -2.625553 | -2.747826 |
|     |                                                                                 |           |           | H   | -0.088055                                               | -2.725642 | -3.644996 |
|     |                                                                                 |           |           | H   | -0.682702                                               | -1.700049 | -2.632052 |
|     |                                                                                 |           |           | O   | 1.129621                                                | 3.130380  | 2.067659  |
|     |                                                                                 |           |           | H   | 1.875374                                                | 2.529734  | 1.872060  |
|     |                                                                                 |           |           | H   | 1.491013                                                | 3.915149  | 2.483771  |
|     |                                                                                 |           |           | O   | 2.182290                                                | -1.510506 | 1.569814  |
|     |                                                                                 |           |           | H   | 1.991809                                                | -1.793264 | 0.653947  |
|     |                                                                                 |           |           | H   | 2.808483                                                | -2.132419 | 1.947925  |
|     |                                                                                 |           |           | --- |                                                         |           |           |
|     |                                                                                 |           |           |     | 45.6, 1.6; 51.9, 0.2; 55.7, 0.8; 64.0, 0.7; 70.0, 1.8;  |           |           |
|     |                                                                                 |           |           |     | 71.8, 1.7; 73.2, 0.2; 78.4, 1.3; 87.9, 1.0; 91.3, 2.1;  |           |           |
|     |                                                                                 |           |           |     | 99.2, 0.9; 101.9, 3.3; 107.9, 2.2; 114.8, 2.5; 120.3,   |           |           |

1.0; 135.5, 0.7; 141.5, 1.5; 149.0, 0.2; 165.8, 7.1; 172.9, 5.2; 183.1, 3.2; 188.8, 8.8; 196.8, 8.8; 200.4, 2.8; 210.2, 14.5; 215.3, 2.0; 221.6, 11.1; 240.2, 2.1; 252.2, 28.8; 257.1, 19.8; 267.8, 3.5; 270.9, 8.8; 281.2, 4.5; 292.9, 20.5; 302.6, 26.2; 307.9, 19.0; 311.1, 28.2; 324.0, 56.7; 327.8, 112.4; 335.1, 41.7; 341.6, 12.9; 356.7, 24.9; 365.9, 34.4; 380.2, 45.0; 400.3, 29.6; 407.3, 27.4; 421.5, 20.5; 435.7, 48.0; 438.1, 21.1; 448.2, 138.7; 457.4, 76.8; 486.5, 107.7; 504.9, 86.9; 525.0, 7.5; 556.3, 23.0; 579.2, 35.1; 594.1, 92.3; 599.4, 13.6; 609.9, 4.6; 638.1, 98.8; 643.6, 242.7; 654.8, 37.6; 669.1, 624.6; 691.3, 406.4; 697.1, 264.9; 745.7, 331.2; 795.7, 46.0; 805.1, 56.8; 822.6, 126.6; 832.2, 131.7; 847.3, 48.1; 864.3, 63.9; 873.9, 63.8; 907.8, 77.3; 926.5, 194.8; 1045.9, 102.2; 1359.9, 70.2; 1579.4, 165.5; 1585.7, 130.7; 1590.7, 86.4; 1592.2, 107.3; 1615.6, 93.9; 1624.3, 22.2; 1633.4, 37.9; 1639.7, 66.6; 1658.8, 91.3; 1668.9, 34.1; 1675.7, 30.6; 1698.1, 13.5; 2418.7, 376.6; 3258.8, 958.1; 3498.7, 380.2; 3547.8, 231.0; 3559.1, 1471.4; 3578.5, 470.4; 3608.4, 60.0; 3619.1, 111.9; 3635.5, 183.5; 3650.9, 153.2; 3663.5, 832.0; 3672.2, 769.7; 3714.1, 293.9; 3725.1, 599.6; 3770.8, 837.3; 3772.9, 58.0; 3785.6, 693.6; 3900.1, 102.0; 3907.4, 172.0; 3927.3, 111.4; 3938.7, 162.4; 3942.9, 193.0; 3945.9, 172.4; 3946.5, 123.7; 3959.5, 194.5;

-2484.326851650 -2484.040089 -2484.005633 -2484.102631

$\eta^1\text{-OL} [\text{Co}(\text{H}_2\text{O})_{13}\text{N}_2\text{O}]^+$

|    |           |           |           |
|----|-----------|-----------|-----------|
| Co | -0.590321 | -0.314408 | -0.418275 |
| O  | -1.017393 | 0.083553  | -2.555732 |
| H  | -1.323594 | 1.003529  | -2.637251 |
| O  | 2.633685  | 1.130392  | 1.166119  |
| H  | 2.476156  | 0.325713  | 1.694289  |
| O  | -2.394000 | 1.186284  | 0.271869  |
| H  | -2.068577 | 1.497365  | 1.141881  |
| H  | 3.370401  | 0.908149  | 0.570049  |
| H  | -3.289575 | 0.867292  | 0.412923  |
| H  | -1.649011 | -0.476589 | -3.012742 |
| O  | 0.932648  | -1.733689 | -1.135402 |
| H  | 1.646561  | -2.103469 | -0.596170 |
| H  | 1.384218  | -1.302169 | -1.877195 |
| O  | -0.440188 | -0.749135 | 1.686226  |
| H  | -0.592527 | 0.049205  | 2.216901  |
| H  | 0.417033  | -1.105981 | 1.973475  |
| O  | 3.445787  | -2.336955 | 0.175571  |
| H  | 3.934556  | -1.585346 | -0.217523 |
| H  | 3.938973  | -3.137468 | -0.020210 |
| O  | 0.723082  | 1.478024  | -0.812508 |
| H  | 0.208515  | 2.287665  | -0.955792 |
| H  | 1.306578  | 1.575772  | -0.037519 |
| O  | -1.074954 | 1.849309  | 2.610096  |
| H  | -1.445224 | 2.098509  | 3.460337  |
| H  | -0.305534 | 2.441113  | 2.449293  |
| O  | -1.525743 | 2.713071  | -1.828156 |
| H  | -2.060620 | 2.383596  | -1.081201 |
| H  | -1.922307 | 3.530417  | -2.137463 |
| O  | 2.302318  | 0.241627  | -2.649294 |
| H  | 2.204972  | 0.413775  | -3.588590 |
| H  | 1.648894  | 0.800814  | -2.175664 |
| N  | -2.675320 | -2.357684 | 0.664615  |
| N  | -3.236008 | -2.472303 | 1.607797  |
| O  | -2.081361 | -2.216028 | -0.341521 |
| O  | 4.309596  | 0.065171  | -0.848540 |
| H  | 5.194808  | 0.345569  | -1.095153 |
| H  | 3.735057  | 0.186130  | -1.637339 |
| O  | 1.142398  | 3.270277  | 1.955938  |
| H  | 1.903459  | 2.676242  | 1.823524  |
| H  | 1.480008  | 4.106863  | 2.281475  |
| O  | 2.210481  | -1.371744 | 2.379848  |
| H  | 2.711122  | -1.900380 | 1.725147  |
| H  | 2.474515  | -1.672983 | 3.252753  |

26.1, 0.0; 36.7, 0.5; 40.7, 0.5; 47.0, 1.0; 52.6, 0.7; 54.4, 1.2; 61.1, 1.9; 64.1, 0.7; 70.5, 1.2; 74.3, 1.2; 79.8, 0.1; 84.7, 3.5; 90.3, 0.1; 93.7, 0.1; 99.3, 0.2; 104.7, 1.0; 112.9, 1.6; 122.0, 0.6; 134.2, 0.5; 149.2, 2.8; 157.6, 4.2; 159.5, 0.6; 185.1, 8.8; 192.0, 9.1; 198.1, 3.1; 204.8, 0.8; 210.1, 1.1; 211.8, 1.0; 219.5, 20.6; 232.8, 13.3; 236.1, 14.9; 248.6, 84.4; 253.2, 1.6; 257.9, 51.0; 267.3, 12.6; 272.9, 13.9; 276.1,

24.4; 283.4, 6.8; 296.3, 10.3; 302.4, 6.3; 310.3, 10.2; 313.0, 17.2; 314.9, 14.3; 327.7, 11.8; 336.4, 86.7; 341.9, 22.3; 354.1, 21.9; 364.3, 17.1; 386.8, 49.0; 393.0, 135.0; 402.5, 24.8; 420.8, 58.5; 428.3, 91.9; 451.3, 45.1; 461.2, 107.7; 471.6, 197.2; 484.2, 36.3; 498.5, 20.1; 514.0, 47.8; 537.9, 56.8; 547.8, 33.9; 579.6, 166.2; 595.8, 43.1; 600.8, 6.7; 601.8, 24.6; 606.9, 8.5; 630.9, 156.0; 639.1, 183.2; 679.0, 43.1; 706.8, 108.6; 715.6, 719.7; 731.9, 174.5; 749.5, 223.1; 781.4, 98.3; 787.7, 366.7; 806.9, 52.6; 833.9, 116.2; 836.2, 54.4; 847.4, 42.2; 861.3, 85.2; 892.7, 93.8; 946.7, 109.1; 1352.4, 59.7; 1548.1, 103.1; 1584.3, 117.7; 1604.3, 182.4; 1610.7, 107.0; 1613.6, 44.0; 1623.5, 85.2; 1626.0, 69.8; 1638.3, 8.6; 1641.9, 42.0; 1647.1, 59.6; 1665.1, 12.2; 1676.9, 96.3; 1693.8, 31.0; 2412.3, 397.2; 3472.3, 358.8; 3480.5, 773.5; 3547.3, 796.1; 3560.5, 250.7; 3575.6, 494.7; 3605.6, 864.6; 3632.3, 170.3; 3641.7, 181.3; 3647.1, 304.5; 3684.3, 534.7; 3697.6, 303.3; 3704.9, 329.7; 3726.5, 867.6; 3728.6, 424.7; 3758.6, 425.3; 3778.1, 631.6; 3788.8, 717.1; 3920.2, 122.9; 3932.8, 147.3; 3937.3, 120.4; 3938.6, 123.7; 3939.7, 165.7; 3940.2, 208.9; 3944.2, 128.5; 3951.3, 137.8; 3957.9, 173.1;

-2560.797446750 -2560.454065 -2560.415834 -2560.522999

$\eta^1\text{-OL} [\text{Co}(\text{H}_2\text{O})_{14}\text{N}_2\text{O}]^+$

|    |           |           |           |
|----|-----------|-----------|-----------|
| Co | 0.180974  | -0.585118 | -0.678776 |
| O  | -0.015809 | -0.920266 | 1.605543  |
| H  | 0.263499  | -0.041992 | 1.924346  |
| O  | -1.194023 | 3.314747  | 1.222362  |
| H  | -1.304720 | 4.126743  | 1.723669  |
| H  | 1.081395  | 1.403678  | -0.967626 |
| H  | 0.495858  | 2.007793  | -1.458885 |
| H  | -0.399662 | 2.863619  | 1.587026  |
| H  | 1.964702  | 1.365127  | -1.383360 |
| H  | -0.984560 | -0.969327 | 1.715023  |
| O  | -0.357537 | -2.645033 | -0.982991 |
| H  | -1.318553 | -2.763101 | -1.047132 |
| H  | -0.015996 | -3.253428 | -0.311819 |
| O  | -1.468215 | 0.055183  | -1.806894 |
| H  | -1.741400 | 0.974856  | -1.672005 |
| H  | -2.240416 | -0.520541 | -1.680061 |
| O  | -3.085633 | -2.061322 | -0.947234 |
| H  | -3.169012 | -1.847774 | 0.001932  |
| H  | -3.900548 | -2.484961 | -1.226064 |
| O  | -2.826392 | -1.024804 | 1.604029  |
| H  | -3.317874 | -1.230698 | 2.403416  |
| H  | -3.052012 | -0.098564 | 1.355666  |
| O  | -1.131321 | 2.881163  | -1.539319 |
| H  | -1.386914 | 3.565234  | -2.162579 |
| H  | -1.199652 | 3.259230  | -0.643413 |
| O  | 0.929412  | 1.712782  | 1.731247  |
| H  | 1.062361  | 1.631543  | 0.760603  |
| H  | 1.835227  | 1.745559  | 2.070457  |
| O  | 2.350182  | -1.218356 | -0.151936 |
| H  | 2.891473  | -1.140757 | -0.948118 |
| H  | 2.264919  | -2.157292 | 0.095371  |
| O  | 1.248360  | -3.305131 | 1.196988  |
| H  | 0.829503  | -2.554958 | 1.662392  |
| H  | 1.473891  | -3.975586 | 1.844795  |
| O  | 3.715000  | 0.884231  | -1.457326 |
| H  | 4.394998  | 1.211724  | -2.050430 |
| H  | 3.997252  | 1.082476  | -0.546672 |
| O  | -3.212470 | 1.459324  | 0.659295  |
| H  | -2.577811 | 2.145575  | 0.938229  |
| H  | -4.052268 | 1.900278  | 0.514415  |
| O  | 3.574088  | 0.774115  | 1.322023  |
| H  | 3.159094  | -0.063787 | 1.032666  |
| H  | 4.286003  | 0.538717  | 1.922184  |
| N  | 1.484796  | -1.011901 | -3.879010 |
| N  | 2.088949  | -1.258832 | -4.923926 |
| O  | 0.817875  | -0.739314 | -2.725532 |

34.0, 0.4; 39.5, 0.3; 45.0, 0.6; 47.4, 0.9; 52.2, 1.5; 58.3, 1.7; 64.4, 0.5; 68.4, 0.6; 72.3, 0.4; 75.0, 0.0; 81.7, 0.4; 86.2, 1.4; 88.7, 0.9; 94.9, 0.7; 101.9, 0.1; 106.2, 1.6; 114.0, 1.3; 115.1, 0.7; 128.9, 0.9; 139.0, 0.2; 143.5, 2.1; 152.6, 4.8; 170.7, 10.4; 176.2, 1.3; 179.9, 1.3; 185.7, 4.1; 193.3, 3.5; 200.7, 5.9; 204.3, 8.8; 208.0, 7.9; 230.1, 14.0; 233.8, 13.0; 240.6, 3.6; 244.8, 0.6; 250.6, 91.4; 263.0, 12.6; 271.3, 19.8;

277.7, 26.2; 280.2, 40.0; 286.1, 4.0; 289.4, 6.7; 300.1, 4.9; 303.9, 4.2; 306.6, 49.5; 311.9, 2.6; 325.8, 25.9; 329.2, 28.5; 344.1, 22.2; 358.6, 16.7; 359.8, 23.2; 362.5, 23.3; 373.1, 40.1; 399.5, 75.4; 411.6, 60.9; 421.9, 67.8; 428.7, 176.3; 444.6, 107.9; 450.7, 156.0; 467.6, 8.5; 481.8, 110.4; 485.4, 52.4; 490.8, 32.9; 517.0, 142.5; 542.8, 2.7; 554.5, 3.2; 578.2, 231.0; 590.3, 163.2; 603.2, 3.4; 612.1, 9.5; 614.9, 101.6; 621.6, 218.1; 637.4, 320.6; 677.6, 393.3; 687.9, 30.4; 719.6, 419.2; 734.0, 34.2; 747.4, 98.4; 756.9, 169.8; 774.5, 62.3; 787.4, 138.7; 795.6, 35.2; 812.5, 243.5; 817.6, 208.3; 825.1, 83.9; 866.3, 78.2; 907.9, 52.5; 946.9, 206.0; 964.0, 74.2; 1360.1, 76.1; 1553.7, 92.7; 1580.2, 174.6; 1585.1, 133.8; 1593.3, 83.8; 1597.5, 35.2; 1602.0, 77.9; 1604.8, 62.6; 1614.8, 67.7; 1620.4, 50.3; 1640.6, 14.3; 1645.5, 44.2; 1654.0, 62.4; 1659.1, 11.0; 1686.9, 63.8; 2415.1, 410.9; 3445.0, 333.8; 3467.6, 903.3; 3518.8, 907.9; 3573.0, 190.1; 3589.6, 397.8; 3618.4, 127.0; 3622.9, 395.9; 3630.7, 485.2; 3651.4, 313.3; 3674.5, 457.5; 3679.4, 133.3; 3691.1, 209.5; 3693.1, 519.8; 3702.5, 1282.9; 3714.5, 217.9; 3728.8, 444.5; 3795.4, 742.4; 3819.9, 596.6; 3822.2, 203.3; 3846.7, 377.3; 3934.1, 127.2; 3934.6, 137.6; 3938.4, 159.9; 3946.5, 103.1; 3947.0, 124.5; 3950.4, 164.3; 3953.3, 206.2; 3955.9, 129.0;

-2637.170082610 -2636.867485 -2636.827245 -2636.937681

$\eta^1$ -OL [Co(H<sub>2</sub>O)<sub>15</sub>N<sub>2</sub>O]<sup>+</sup>

|    |           |           |           |
|----|-----------|-----------|-----------|
| Co | -0.617887 | 0.238793  | -0.009530 |
| O  | -1.726980 | 1.605037  | 1.383589  |
| H  | -1.631944 | 1.257885  | 2.284670  |
| O  | 2.688365  | -1.647149 | 0.370252  |
| H  | 2.587365  | -1.643843 | -0.599577 |
| O  | -2.214744 | -1.272086 | 0.728512  |
| H  | -2.086400 | -2.149633 | 0.327215  |
| H  | 3.447267  | -1.065878 | 0.545116  |
| H  | -3.081715 | -0.904069 | 0.468045  |
| H  | -1.335154 | 2.499592  | 1.329793  |
| O  | 0.930171  | 1.756939  | -0.728001 |
| H  | 1.500106  | 1.562804  | -1.485147 |
| H  | 1.551295  | 1.879950  | 0.014920  |
| O  | -0.214087 | -1.154746 | -1.611043 |
| H  | -0.449958 | -2.065037 | -1.362302 |
| O  | 0.663980  | -1.196878 | -2.022790 |
| H  | 3.484593  | 1.163006  | -1.978435 |
| H  | 3.971784  | 1.056252  | -1.135902 |
| H  | 3.986596  | 1.776839  | -2.520316 |
| O  | 0.747202  | -0.226504 | 1.766092  |
| H  | 0.171695  | -0.590594 | 2.463673  |
| H  | 1.316712  | -0.928402 | 1.402629  |
| O  | -1.025264 | -3.510684 | -0.349540 |
| H  | -1.306640 | -4.363561 | -0.687686 |
| H  | -0.318119 | -3.671406 | 0.312320  |
| O  | -1.513930 | -0.514696 | 3.221572  |
| H  | -1.939242 | -0.974666 | 2.467016  |
| H  | -1.887832 | -0.864777 | 4.032532  |
| O  | -4.067186 | 0.597003  | 0.252051  |
| H  | -4.955892 | 0.878353  | 0.475114  |
| H  | -3.442050 | 1.211309  | 0.676498  |
| O  | -0.332959 | 3.790949  | 0.608046  |
| H  | -0.656901 | 4.646707  | 0.319228  |
| H  | -0.012993 | 3.322080  | -0.182184 |
| O  | 2.323315  | 1.914853  | 1.673898  |
| H  | 2.104586  | 2.723178  | 2.145303  |
| H  | 1.700761  | 1.208918  | 1.963553  |
| N  | -2.634165 | 0.475809  | -2.315079 |
| N  | -3.292978 | -0.289029 | -2.800741 |
| O  | -1.934677 | 1.270784  | -1.794145 |
| O  | 4.410105  | 0.614451  | 0.570986  |
| H  | 5.303549  | 0.671752  | 0.919720  |
| H  | 3.840183  | 1.183598  | 1.130826  |
| O  | 1.013627  | -3.532353 | 1.453111  |
| H  | 1.810327  | -3.072864 | 1.132552  |
| H  | 1.306304  | -4.224908 | 2.048917  |
| O  | 2.469732  | -1.305649 | -2.414655 |
| H  | 2.918983  | -0.440197 | -2.495660 |
| H  | 2.798028  | -1.870594 | -3.118350 |

30.9, 0.2; 37.1, 0.2; 39.6, 1.1; 41.7, 0.4; 49.6, 0.2; 53.1, 0.2; 55.9, 0.5; 62.0, 0.1; 64.5, 1.3; 67.7, 0.5; 78.4, 1.1; 83.1, 0.6; 84.8, 0.7; 88.8, 1.1; 91.3, 3.2;

96.8, 0.0; 104.4, 1.3; 107.7, 1.8; 113.2, 2.9; 120.8, 0.0; 127.4, 1.0; 134.8, 0.2; 147.6, 0.6; 151.7, 3.7; 153.6, 7.5; 168.2, 6.4; 180.8, 7.4; 194.1, 2.7; 199.8, 6.1; 209.1, 3.9; 211.7, 11.2; 214.9, 12.1; 234.0, 13.4; 242.1, 18.0; 249.3, 12.8; 252.6, 2.0; 255.9, 42.3; 258.9, 10.6; 260.2, 23.8; 270.2, 23.9; 275.2, 24.2; 280.3, 22.1; 285.5, 67.7; 292.8, 0.5; 295.2, 44.0; 303.2, 38.3; 305.7, 96.8; 311.2, 17.5; 314.7, 13.3; 318.2, 15.1; 323.4, 20.2; 334.0, 119.9; 356.4, 36.2; 360.7, 59.1; 364.9, 12.1; 373.6, 54.2; 408.7, 38.6; 412.1, 24.5; 432.0, 88.7; 443.5, 85.8; 455.5, 97.6; 465.8, 61.3; 479.5, 81.6; 489.8, 19.3; 496.0, 148.7; 504.6, 12.8; 515.3, 182.6; 542.7, 115.9; 558.3, 80.5; 574.0, 85.4; 590.1, 28.8; 597.3, 14.3; 609.7, 92.8; 611.1, 70.6; 626.5, 45.6; 641.6, 88.8; 662.0, 110.9; 678.6, 390.6; 700.7, 323.9; 705.8, 78.0; 735.1, 175.3; 749.4, 23.0; 753.8, 464.2; 776.0, 196.2; 792.7, 288.5; 808.4, 102.4; 827.4, 30.1; 841.1, 47.7; 854.7, 60.5; 872.1, 251.2; 884.5, 55.9; 908.2, 137.4; 932.8, 66.1; 944.7, 114.1; 1358.4, 62.7; 1555.6, 122.8; 1577.9, 68.6; 1586.1, 28.9; 1604.0, 167.6; 1606.2, 203.5; 1608.9, 19.3; 1610.3, 142.4; 1615.4, 63.8; 1623.7, 37.0; 1633.4, 12.4; 1635.4, 28.6; 1638.2, 44.5; 1651.1, 25.5; 1669.1, 81.5; 1691.6, 35.6; 2413.8, 415.5; 3456.0, 541.3; 3516.5, 230.0; 3533.8, 601.0; 3540.0, 493.7; 3570.1, 566.8; 3582.4, 632.1; 3615.2, 544.9; 3617.0, 556.5; 3638.0, 68.4; 3645.7, 255.0; 3651.4, 419.5; 3669.2, 49.5; 3697.1, 153.2; 3691.1, 596.2; 3708.4, 467.8; 3718.2, 1578.1; 3727.6, 599.1; 3746.1, 669.4; 3763.1, 332.6; 3772.9, 685.4; 3824.0, 368.7; 3932.3, 170.8; 3934.9, 113.2; 3938.5, 179.4; 3941.8, 150.2; 3948.7, 126.5; 3955.0, 68.1; 3955.4, 280.8; 3955.9, 115.3; 3968.8, 158.2;

-2713.681777820 -2713.281186 -2713.238386 -2713.354949

$\eta^1$ -OL [Co(H<sub>2</sub>O)<sub>16</sub>N<sub>2</sub>O]<sup>+</sup>

|    |           |           |           |
|----|-----------|-----------|-----------|
| Co | -0.638494 | 0.079627  | -0.099341 |
| O  | -1.423835 | 1.942429  | 0.878416  |
| H  | -1.266239 | 1.892281  | 1.834839  |
| O  | 2.462872  | -2.072873 | 0.661760  |
| H  | 2.301802  | -2.303638 | -0.271291 |
| O  | -2.350628 | -0.923994 | 1.097549  |
| H  | -2.343201 | -1.889057 | 0.969787  |
| H  | 3.266072  | -1.524433 | 0.651123  |
| H  | -3.188370 | -0.543942 | 0.771551  |
| H  | -1.009748 | 2.743340  | 0.513370  |
| O  | 1.009550  | 1.187909  | -1.238380 |
| H  | 1.540282  | 0.739780  | -1.913759 |
| H  | 1.654970  | 1.399857  | -0.529054 |
| O  | -0.527353 | -1.733439 | -1.265809 |
| H  | -0.837616 | -2.499563 | -0.752773 |
| H  | 0.312221  | -1.994057 | -1.678156 |
| O  | 3.360043  | -0.050890 | -2.354299 |
| H  | 3.879625  | 0.003913  | -1.524123 |
| H  | 3.899771  | 0.331016  | -3.050877 |
| O  | 0.727843  | -0.154481 | 1.688384  |
| H  | 0.181616  | -0.222286 | 2.490733  |
| H  | 1.202851  | -0.988857 | 1.528908  |
| O  | -1.492997 | -3.511917 | 0.657640  |
| H  | -1.908491 | -4.372626 | 0.570141  |
| H  | -0.745194 | -3.610117 | 1.286523  |
| O  | -1.410365 | 0.438051  | 3.245084  |
| H  | -1.949452 | -0.145107 | 2.671948  |
| H  | -1.778537 | 0.406094  | 4.130136  |
| O  | -3.978128 | 0.997308  | 0.197331  |
| H  | -4.794562 | 1.458971  | 0.395205  |
| H  | -3.238538 | 1.589477  | 0.421122  |
| O  | -0.144846 | 3.633873  | -0.914236 |
| H  | -0.637083 | 4.101146  | -1.593022 |
| H  | 0.210814  | 2.816863  | -1.320923 |
| O  | 2.518435  | 1.727677  | 0.979827  |
| H  | 2.339040  | 2.667835  | 1.189589  |
| H  | 1.881393  | 1.186220  | 1.489514  |
| N  | -2.784844 | -0.050795 | -2.293578 |
| N  | -3.563073 | -0.828256 | -2.504510 |
| O  | -1.960763 | 0.761052  | -2.059185 |
| O  | 4.371973  | -0.016401 | 0.204520  |
| H  | 5.282321  | 0.040652  | 0.505478  |
| H  | 3.880520  | 0.739916  | 0.601439  |
| O  | 0.713346  | -3.450462 | 2.256240  |
| H  | 1.523966  | -3.166387 | 1.796592  |

|   |          |           |           |
|---|----------|-----------|-----------|
| H | 0.980082 | -4.021746 | 2.978966  |
| O | 2.062226 | -2.414265 | -2.105597 |
| H | 2.590681 | -1.652443 | -2.418316 |
| H | 2.285037 | -3.167976 | -2.657210 |
| O | 1.489040 | 4.214101  | 1.229650  |
| H | 1.777775 | 5.088312  | 1.497310  |
| H | 0.969642 | 4.310552  | 0.412910  |

---

25.8, 0.1; 32.6, 0.2; 37.3, 0.6; 40.4, 1.6; 44.8, 0.2;  
50.4, 1.0; 51.1, 0.2; 54.5, 0.0; 59.5, 0.3; 60.8, 2.2;  
61.8, 1.1; 69.6, 0.3; 79.3, 0.6; 81.7, 1.5; 84.7, 0.4;  
89.4, 0.7; 98.1, 0.0; 105.0, 0.9; 107.1, 0.9; 112.2,  
1.6; 125.8, 0.3; 126.2, 0.0; 138.1, 0.0; 145.6, 0.3;  
153.8, 1.7; 157.3, 7.6; 162.6, 3.5; 177.1, 3.7; 187.9,  
16.5; 198.3, 27.4; 201.2, 9.0; 205.2, 13.1; 212.3, 3.7;  
213.9, 15.9; 223.9, 75.1; 231.5, 7.6; 235.8, 10.0;  
242.5, 12.0; 244.8, 85.8; 251.0, 12.3; 256.6, 5.8;  
259.8, 16.3; 264.4, 24.5; 275.7, 14.9; 276.3, 92.0;  
277.2, 29.9; 284.8, 17.5; 291.9, 53.3; 292.6, 16.9;  
303.9, 31.9; 309.7, 19.9; 312.3, 1.1; 314.9, 3.8;  
320.4, 31.4; 331.7, 29.5; 342.4, 64.7; 353.8, 49.3;  
357.9, 9.6; 367.6, 36.3; 392.2, 11.5; 404.1, 32.4;  
422.8, 126.5; 432.2, 53.6; 439.1, 51.9; 462.5, 22.0;  
473.0, 156.8; 475.6, 38.5; 492.1, 46.8; 503.7, 170.2;  
508.7, 108.1; 528.4, 19.0; 545.8, 142.8; 571.0, 45.5;  
583.2, 99.5; 597.3, 58.4; 600.0, 21.5; 609.5, 14.6;  
614.7, 21.9; 635.2, 143.5; 641.4, 97.4; 651.5, 69.7;  
676.8, 64.3; 688.9, 348.9; 693.0, 277.7; 706.5, 169.1;  
714.7, 250.5; 733.2, 302.6; 751.2, 194.5; 771.2, 152.3;  
787.1, 77.6; 802.9, 326.8; 815.8, 66.7; 825.7, 142.9;  
842.0, 67.6; 856.2, 18.2; 871.2, 155.6; 881.1, 159.7;  
923.7, 59.7; 956.3, 132.4; 986.7, 163.6; 1358.2, 65.7;  
1545.8, 142.7; 1559.0, 48.5; 1577.0, 50.6; 1600.0,  
31.6; 1603.5, 187.1; 1606.8, 150.2; 1607.0, 98.9;  
1615.2, 23.2; 1617.7, 147.3; 1628.0, 24.3; 1630.9,  
12.6; 1634.5, 39.4; 1655.5, 59.0; 1658.6, 1.9; 1667.0,  
102.2; 1692.4, 40.0; 2413.7, 423.0; 3438.6, 789.7;  
3471.7, 222.8; 3516.5, 416.4; 3542.0, 577.2; 3558.6,  
675.7; 3575.6, 87.6; 3591.6, 990.5; 3603.3, 908.4;  
3610.6, 534.1; 3631.7, 151.0; 3642.7, 385.0; 3658.3,  
390.5; 3665.8, 313.6; 3672.5, 159.0; 3692.4, 553.2;  
3701.3, 64.3; 3712.3, 211.6; 3720.4, 1313.9; 3731.4,  
831.1; 3754.3, 552.1; 3760.0, 469.9; 3789.8, 801.4;  
3795.1, 435.1; 3935.9, 135.4; 3939.1, 151.1; 3943.0,  
158.8; 3946.6, 135.6; 3947.6, 131.6; 3958.0, 79.8;  
3958.6, 215.7; 3964.7, 182.5; 3968.0, 150.1;

-2790.124125540 -2789.698310 -2789.652846 -  
2789.775806

$\eta^1$ -OL [Co(H<sub>2</sub>O)<sub>11</sub>N<sub>2</sub>O]<sup>+</sup>

|    |           |           |           |
|----|-----------|-----------|-----------|
| Co | -0.638494 | 0.079627  | -0.099341 |
| O  | -1.423835 | 1.942429  | 0.878416  |
| H  | -1.266239 | 1.892281  | 1.834839  |
| O  | 2.462872  | -2.072873 | 0.661760  |
| H  | 2.301802  | -2.303638 | -0.271291 |
| O  | -2.350628 | -0.923994 | 1.097549  |
| H  | -2.343201 | -1.889057 | 0.969787  |
| H  | 3.266072  | -1.524433 | 0.651123  |
| H  | -3.188370 | -0.543942 | 0.771551  |
| H  | -1.009748 | 2.743340  | 0.513370  |
| O  | 1.009550  | 1.187909  | -1.238380 |
| H  | 1.540282  | 0.739780  | -1.913759 |
| H  | 1.654970  | 1.399857  | -0.529054 |
| O  | -0.527353 | -1.733439 | -1.265809 |
| H  | -0.837616 | -2.499563 | -0.752773 |
| H  | 0.312221  | -1.994057 | -1.678156 |
| O  | 3.360043  | -0.050890 | -2.354299 |
| H  | 3.879625  | 0.003913  | -1.524123 |
| H  | 3.899771  | 0.331016  | -3.050877 |
| O  | 0.727843  | -0.154481 | 1.688384  |
| H  | 0.181616  | -0.222286 | 2.490733  |
| H  | 1.202851  | -0.988857 | 1.528908  |
| O  | -1.492997 | -3.511917 | 0.657640  |
| H  | -1.908491 | -4.372626 | 0.570141  |
| H  | -0.745194 | -3.610117 | 1.286523  |
| O  | -1.280290 | 0.565105  | 3.167324  |
| H  | -1.649379 | 0.093340  | 2.392479  |
| H  | -2.012281 | 0.929736  | 3.668445  |
| O  | -3.978128 | 0.997308  | 0.197331  |
| H  | -4.794562 | 1.458971  | 0.395205  |
| H  | -3.238538 | 1.589477  | 0.421122  |
| O  | -0.144846 | 3.633873  | -0.914236 |

|   |           |           |           |
|---|-----------|-----------|-----------|
| H | -0.637083 | 4.101146  | -1.593022 |
| H | 0.210814  | 2.816863  | -1.320923 |
| O | 2.518435  | 1.727677  | 0.979827  |
| H | 2.339040  | 2.667835  | 1.189589  |
| H | 1.881393  | 1.186220  | 1.489514  |
| N | -2.784844 | -0.050795 | -2.293578 |
| N | -3.563073 | -0.828256 | -2.504510 |
| O | -1.960763 | 0.761052  | -2.059185 |
| O | 4.371973  | -0.016401 | 0.204520  |
| H | 5.282321  | 0.040652  | 0.505478  |
| H | 3.880520  | 0.739916  | 0.601439  |
| O | 0.645200  | -3.495141 | 2.202821  |
| H | 1.371954  | -3.076276 | 1.707382  |
| H | 0.291045  | -2.835718 | 2.802473  |
| O | 2.062226  | -2.414265 | -2.105597 |
| H | 2.590681  | -1.652443 | -2.418316 |
| H | 2.285037  | -3.167976 | -2.657210 |
| O | 1.489040  | 4.214101  | 1.229650  |
| H | 1.777775  | 5.088312  | 1.497310  |
| H | 0.969642  | 4.310552  | 0.412910  |
| O | -0.798767 | -2.001855 | 3.859584  |
| H | -0.387415 | -2.166746 | 4.711171  |
| H | -1.146216 | -1.107164 | 3.839402  |

---

27.0, 0.6; 30.2, 0.8; 32.4, 0.3; 40.5, 1.5; 49.8, 0.7;  
50.4, 1.5; 53.4, 0.9; 58.1, 1.0; 61.2, 1.5; 66.2, 1.0;  
67.2, 0.2; 69.9, 1.4; 77.1, 0.9; 82.0, 1.8; 84.1, 0.5;  
89.7, 0.2; 94.0, 0.2; 99.0, 0.8; 102.0, 0.5; 105.5,  
1.3; 115.4, 1.2; 123.4, 0.7; 125.6, 0.4; 134.8, 0.5;  
141.5, 1.0; 143.6, 0.7; 149.2, 1.1; 155.1, 3.2; 174.9,  
1.4; 183.5, 5.2; 189.6, 19.1; 194.4, 20.7; 202.8, 6.7;  
206.5, 6.2; 212.4, 15.5; 219.2, 8.0; 229.1, 22.1;  
234.0, 10.8; 236.0, 85.7; 243.2, 7.6; 248.7, 29.5;  
255.6, 83.9; 258.6, 3.8; 259.6, 23.8; 260.6, 61.0;  
269.8, 25.6; 276.3, 31.4; 279.7, 10.6; 287.9, 30.4;  
288.6, 33.9; 297.2, 23.7; 301.3, 41.8; 305.1, 38.3;  
313.2, 6.6; 319.2, 9.9; 325.4, 11.6; 330.4, 14.5;  
338.5, 5.2; 354.9, 81.4; 361.3, 13.1; 368.4, 34.0;  
388.1, 7.2; 393.6, 26.9; 398.1, 30.7; 410.9, 54.4;  
433.9, 56.9; 443.2, 66.5; 458.1, 31.6; 471.5, 93.1;  
475.9, 58.5; 491.3, 52.2; 499.5, 38.9; 510.4, 28.6;  
529.6, 74.6; 531.5, 81.2; 552.8, 150.2; 566.3, 15.8;  
584.6, 5.4; 592.8, 217.3; 599.7, 37.8; 608.8, 6.4;  
617.4, 196.3; 633.6, 1.3; 639.6, 309.4; 640.0, 53.6;  
660.6, 288.0; 671.4, 64.6; 680.3, 361.6; 693.3, 180.6;  
712.5, 114.7; 713.2, 177.3; 725.3, 142.6; 759.1, 338.7;  
768.9, 121.0; 785.8, 85.3; 800.2, 241.0; 820.4, 160.6;  
823.6, 94.2; 837.8, 85.2; 857.7, 11.1; 885.4, 198.6;  
908.8, 70.4; 933.2, 119.8; 975.7, 148.9; 992.1, 126.7;  
1001.4, 164.2; 1359.0, 64.0; 1550.3, 86.7; 1584.7,  
66.6; 1596.1, 67.0; 1601.1, 80.6; 1605.6, 167.0;  
1608.2, 225.2; 1618.4, 86.4; 1624.0, 22.6; 1627.0,  
23.4; 1630.4, 47.4; 1637.2, 40.3; 1640.2, 44.8; 1655.6,  
55.4; 1658.7, 7.4; 1668.3, 95.7; 1680.4, 47.8; 1708.9,  
23.5; 2414.4, 415.2; 3394.1, 509.5; 3452.9, 417.7;  
3469.7, 357.7; 3476.0, 713.6; 3522.9, 733.4; 3548.0,  
737.8; 3574.3, 737.1; 3584.6, 862.1; 3600.6, 568.4;  
3605.5, 149.4; 3612.2, 460.9; 3618.9, 445.2; 3657.6,  
328.0; 3662.8, 842.0; 3671.3, 684.0; 3677.9, 191.2;  
3692.7, 484.0; 3707.3, 215.1; 3717.2, 623.8; 3734.1,  
378.1; 3738.4, 972.6; 3759.8, 245.0; 3785.8, 478.0;  
3806.4, 431.1; 3818.0, 730.1; 3935.9, 132.4; 3936.2,  
125.2; 3939.0, 145.6; 3944.0, 184.9; 3945.1, 113.3;  
3948.1, 155.3; 3950.3, 117.2; 3964.6, 175.5; 3972.4,  
159.0;

-2866.540132460 -2866.110654 -2866.063151 -  
2866.190036

PES of [Co(H<sub>2</sub>O)<sub>8</sub>N<sub>2</sub>O]<sup>+</sup>

|                 |           |           |           |
|-----------------|-----------|-----------|-----------|
| <sup>3</sup> N1 |           |           |           |
| Co              | -0.315304 | 0.195609  | 0.040528  |
| O               | -0.777912 | 1.889194  | 1.417236  |
| H               | -0.387946 | 2.710844  | 1.071328  |
| O               | 0.352232  | -0.992609 | 1.843042  |
| H               | 0.806938  | -1.830524 | 1.642180  |
| O               | -0.220239 | 1.551368  | -1.701196 |
| H               | -0.993235 | 1.759283  | -2.231260 |
| O               | 0.633071  | -1.416069 | -1.347459 |
| H               | 0.726374  | -2.255630 | -0.864140 |
| O               | 1.809805  | 0.975334  | 0.541836  |
| H               | 1.734833  | 0.672278  | 1.456990  |

H 2.499408 0.417952 0.134024  
H 0.076524 -1.578991 -2.114525  
H 0.145478 2.403377 -1.401723  
H -0.197339 -1.131075 2.618285  
H -1.653696 2.107750 1.743344  
O 1.856251 -2.933221 0.573570  
H 2.648681 -2.453074 0.272797  
H 2.134098 -3.820365 0.817275  
N -3.181944 -0.892086 -0.230228  
N -2.126992 -0.488506 -0.163564  
O -4.277985 -1.310519 -0.300056  
O 0.936028 3.470914 -0.070900  
H 1.353211 4.335495 -0.091309  
H 1.605266 2.814031 0.193110  
O 3.260790 -0.964596 -0.809911  
H 2.522891 -1.029389 -1.441696  
H 4.077953 -0.897624 -1.311690

---  
29.5, 0.7; 39.6, 0.3; 43.1, 0.1; 61.0, 1.7; 73.7, 1.9;  
88.5, 1.9; 102.4, 1.0; 115.0, 1.1; 118.5, 0.8; 132.4,  
6.2; 152.0, 7.6; 164.8, 1.3; 170.9, 1.9; 181.3, 5.7;  
182.6, 3.0; 196.7, 1.5; 202.1, 2.1; 216.1, 20.5; 230.4,  
3.7; 241.3, 19.7; 245.4, 1.1; 251.4, 6.1; 261.2, 22.5;  
266.2, 9.9; 276.3, 110.3; 284.3, 3.9; 299.7, 8.2;  
313.0, 33.6; 325.1, 107.5; 338.6, 2.1; 362.6, 35.3;  
379.7, 42.7; 386.8, 112.4; 412.3, 227.5; 424.2, 14.0;  
439.1, 194.3; 451.8, 44.7; 468.4, 69.2; 491.7, 2.1;  
501.6, 263.0; 507.5, 29.2; 540.2, 80.1; 558.2, 87.2;  
564.4, 33.9; 594.2, 276.1; 635.1, 136.7; 636.2, 252.4;  
730.8, 171.8; 757.0, 35.9; 782.5, 284.6; 829.0, 177.9;  
878.3, 70.9; 1337.6, 481.8; 1571.9, 110.6; 1578.3,  
116.7; 1586.1, 78.0; 1608.3, 131.0; 1621.9, 69.3;  
1624.4, 49.3; 1643.6, 50.9; 1657.1, 120.1; 2400.3,  
251.3; 3621.6, 335.7; 3647.6, 236.6; 3656.5, 235.0;  
3666.8, 398.3; 3671.0, 66.9; 3716.7, 437.3; 3720.5,  
787.5; 3724.4, 445.7; 3838.0, 222.4; 3926.9, 187.9;  
3933.7, 197.2; 3936.4, 219.9; 3938.9, 133.5; 3940.0,  
71.5; 3945.9, 230.8; 3949.2, 121.7;

-2178.602355980 -2178.385023 -2178.358900 -  
2178.439042

<sup>3</sup>TS<sub>M1-2</sub>

Co 0.524448 -0.201668 -0.232609  
O -0.057159 -2.309602 0.102342  
H 0.167324 -2.978665 -0.550101  
O 2.183858 -0.813566 -1.468166  
H 2.143188 -0.787649 -2.427419  
O 1.282925 1.831396 -0.034148  
H 0.900758 2.583354 -0.493014  
O -0.685413 0.220868 1.571521  
H -1.415197 -0.413465 1.664840  
H -1.011976 -2.380229 0.277948  
H -1.117202 1.092243 1.466516  
H 2.984919 -0.327550 -1.197848  
H 2.250107 1.883194 -0.114008  
O -2.156326 2.409551 0.764100  
H -2.405677 3.228362 1.200284  
H -2.934709 2.114719 0.274632  
O 1.932553 -0.594498 1.529498  
H 1.310778 -0.203328 2.162664  
H 1.901389 -1.545078 1.687579  
O -2.695764 -1.678878 0.906220  
H -3.248591 -1.150133 0.308556  
H -3.300067 -2.229071 1.413837  
N -2.113852 0.300574 -1.447629  
N -0.981187 0.168793 -1.338316  
O -3.260295 0.396958 -1.057107  
O 3.829604 0.780884 0.067445  
H 3.533099 0.317799 0.868664  
H 4.755180 1.010055 0.185288

---  
-259.7, 586.5; 55.0, 0.3; 58.4, 0.4; 69.1, 0.6;  
71.0, 0.6; 98.5, 3.7; 108.4, 1.4; 116.7, 3.7; 120.9,  
3.7; 123.4, 8.6; 30.9, 0.8; 133.9, 6.1; 148.4, 7.6;  
168.1, 3.2; 173.4, 3.7; 179.2, 3.3; 194.0, 0.2; 218.7,  
3.4; 222.9, 5.0; 241.2, 73.0; 249.9, 4.0; 254.1, 23.9;  
263.8, 3.8; 278.9, 109.9; 284.2, 46.8; 300.5, 1.6;  
305.8, 14.3; 312.1, 167.2; 328.1, 37.2; 331.4, 40.3;  
344.0, 27.0; 348.7, 23.7; 354.8, 32.5; 365.5, 39.5;  
377.1, 97.8; 401.2, 178.6; 409.7, 23.1; 418.1, 153.5;  
424.6, 98.6; 442.7, 54.7; 480.0, 32.7; 517.5, 72.0;  
554.3, 171.0; 577.7, 113.2; 601.3, 445.9; 624.6, 104.5;

643.8, 194.6; 717.6, 103.4; 742.0, 190.8; 761.3, 70.5;  
771.2, 86.5; 837.5, 249.3; 1217.3, 730.8; 1580.6,  
137.4; 1598.7, 108.6; 1607.1, 168.7; 1610.2, 33.8;  
1629.7, 122.1; 1631.7, 62.8; 1640.5, 162.5; 1679.6,  
19.8; 2165.4, 115.6; 3614.0, 378.5; 3651.1, 335.6;  
3682.8, 148.3; 3699.0, 190.1; 3720.6, 104.0; 3740.8,  
687.3; 3765.1, 253.8; 3768.5, 163.5; 3816.4, 45.2;  
3900.1, 164.8; 3923.9, 235.8; 3929.7, 132.5; 3936.2,  
149.9; 3942.3, 252.2; 3945.8, 106.6; 3954.1, 181.7;

-2178.593110900 -2178.377580 -2178.351806 -  
2178.429558

<sup>3</sup>N2

Co -0.496882 0.508821 0.115313  
O 0.241065 2.182915 -0.994596  
H -0.175825 2.325354 -1.850099  
O -2.338212 0.637508 -0.942532  
H -3.016314 1.178934 -0.526368  
O -1.206732 -1.091829 1.358319  
H -0.447337 -1.635866 1.636013  
O 1.157317 0.691824 1.327951  
H 1.940806 1.054832 0.873448  
H 1.201355 2.087600 -1.147788  
H 1.429494 -0.144208 1.752736  
H -2.716601 -0.247401 -1.106998  
H -1.776483 -1.668588 0.821615  
O 1.447767 -1.985598 1.801609  
H 1.835672 -2.589210 2.441698  
H 1.950198 -2.080975 0.970470  
O -2.443824 -2.084610 -1.009138  
H -1.606914 -2.097971 -1.500266  
H -2.987138 -2.804345 -1.343206  
O 2.866341 1.360115 -0.718587  
H 2.970161 0.409483 -0.919975  
H 3.710672 1.786333 -0.891429  
N 1.208672 -1.398513 -1.340137  
N 0.157939 -0.869082 -1.220648  
O 2.328030 -1.352646 -0.770845  
O -1.512974 1.916131 1.420645  
H -1.088980 2.776982 1.507174  
H -1.683446 1.593549 2.312429

---  
64.5, 1.2; 80.4, 6.0; 87.5, 0.3; 92.7, 0.7; 103.2,  
3.9; 113.0, 0.1; 125.3, 0.6; 132.7, 1.7; 139.7, 8.0;  
143.5, 3.5; 150.2, 3.2; 156.7, 28.6; 180.4, 4.5; 181.8,  
6.9; 191.8, 5.3; 212.5, 7.4; 223.6, 7.8; 229.9, 4.4;  
238.5, 0.5; 250.9, 1.4; 261.3, 2.9; 266.6, 6.1; 287.2,  
6.9; 321.9, 32.8; 328.8, 18.9; 335.9, 70.8; 338.4, 8.6;  
352.7, 48.7; 353.7, 67.3; 374.0, 9.8; 384.8, 58.5;  
398.9, 33.3; 405.5, 137.8; 419.8, 119.3; 430.7, 163.7;  
436.2, 93.7; 446.1, 81.9; 480.7, 207.3; 516.8, 48.0;  
534.7, 27.7; 575.0, 56.4; 615.4, 15.4; 649.3, 125.5;  
667.8, 466.2; 693.1, 33.2; 719.4, 74.3; 735.5, 421.5;  
775.0, 189.5; 798.0, 88.4; 810.4, 37.2; 858.9, 315.8;  
884.0, 5.9; 1179.4, 306.3; 1577.6, 134.2; 1593.8,  
120.8; 1603.7, 227.0; 1604.7, 131.3; 1623.2, 108.8;  
1625.4, 49.2; 1649.1, 24.4; 1685.2, 5.0; 1831.2, 251.2;  
3594.1, 181.8; 3596.9, 16.5; 3619.7, 135.3; 3630.1,  
280.1; 3641.0, 137.3; 3678.5, 377.1; 3695.6, 1011.5;  
3734.4, 318.2; 3765.9, 557.1; 3835.9, 91.3; 3911.8,  
204.9; 3912.8, 166.0; 3925.7, 229.0; 3927.0, 182.7;  
3932.6, 182.8; 3944.7, 172.7;

-2178.600774630 -2178.382354 -2178.357810 -  
2178.432176

<sup>5</sup>N2

Co 0.532502 -0.510443 0.113355  
O -0.129788 -2.211279 -1.020254  
H 0.297731 -2.331494 -1.874057  
O 2.366679 -0.504903 -0.951250  
H 3.093096 -1.012447 -0.576539  
O 1.160047 1.104951 1.390752  
H 0.370890 1.602854 1.674293  
O -1.124966 -0.795377 1.328233  
H -1.887793 -1.167111 0.844594  
H -1.090400 -2.125408 -1.184440  
H -1.431664 0.026771 1.758451  
H 2.681077 0.407774 -1.109422  
H 1.695704 1.720712 0.861301  
O -1.538695 1.857928 1.841750  
H -1.954316 2.421435 2.500790



O 1.966068 -2.878538 0.548669  
H 2.139627 -3.790766 0.788536  
N -2.423810 0.171557 -1.862055  
N -1.359731 0.240795 -1.615613  
O -4.112597 -1.163866 -0.284865  
O 2.304606 -0.269822 1.193759  
H 2.486580 -1.233150 1.219697  
H 2.138429 0.013362 2.098052  
H -4.865096 -0.899641 -0.843901

---  
29.2, 2.3; 33.9, 2.2; 41.5, 3.2; 50.1, 1.4; 64.6, 1.5; 76.4, 1.2; 82.8, 1.0; 88.1, 2.0; 98.2, 3.4; 101.8, 4.1; 115.3, 2.7; 119.6, 1.8; 121.0, 2.0; 137.8, 3.5; 141.6, 0.6; 160.8, 11.1; 185.7, 0.4; 188.8, 14.1; 205.3, 18.6; 215.4, 8.2; 234.0, 8.2; 246.1, 9.4; 252.2, 17.5; 261.4, 83.4; 270.8, 133.1; 276.7, 10.9; 278.2, 18.4; 283.2, 34.6; 293.1, 29.6; 297.2, 58.1; 316.0, 29.0; 322.9, 18.4; 329.5, 33.2; 361.6, 21.3; 382.8, 151.1; 398.6, 56.4; 406.6, 41.4; 424.6, 59.9; 447.4, 195.9; 523.6, 54.2; 536.4, 28.5; 552.6, 92.6; 574.0, 50.0; 593.6, 134.6; 601.8, 303.3; 609.9, 277.3; 679.9, 47.2; 694.9, 197.7; 729.1, 356.0; 762.9, 87.0; 821.5, 152.3; 873.4, 101.3; 885.2, 251.9; 981.7, 27.4; 1586.4, 139.0; 1597.3, 181.3; 1601.0, 88.3; 1623.0, 99.6; 1630.8, 57.0; 1643.4, 32.4; 1662.2, 23.6; 2452.8, 2.1; 3273.4, 704.8; 3559.9, 231.4; 3575.7, 640.7; 3623.2, 886.2; 3665.9, 419.3; 3728.7, 398.5; 3755.3, 26.6; 3812.2, 566.0; 3852.4, 12.2; 3891.0, 153.4; 3913.9, 165.7; 3919.6, 224.2; 3921.2, 113.7; 3946.6, 161.3; 3951.0, 173.9; 3954.5, 142.5;

-2178.605903320 -2178.394256 -2178.366619 -2178.451429

<sup>5</sup>N3

Co 0.232575 -0.402704 0.039169  
O -0.883312 -1.944306 -0.846817  
H -0.812387 -2.025152 -1.803146  
O 1.275543 -0.128495 -1.732677  
H 2.212584 -0.342473 -1.567505  
O 1.459191 0.946108 0.802540  
H 1.148247 1.498957 1.527911  
O -1.098583 -0.286079 1.680675  
H -0.724155 -0.642809 2.494452  
H -1.839120 -1.953421 -0.604471  
O -1.201292 0.690301 1.804294  
H 1.428470 -1.952249 0.861584  
H 2.366581 -1.738920 0.686962  
H 1.262959 -2.846806 0.548451  
N -2.397657 1.393427 -1.667221  
O 0.773365 2.429377 -0.714439  
N -1.583326 0.933961 -1.099589  
O -0.943596 2.394430 1.501781  
H -0.465126 2.646508 0.684399  
H -1.407969 3.169219 1.826537  
H 1.582094 2.937097 -0.557854  
H 1.237497 0.850170 -1.775297  
O -3.287876 -1.530311 0.195591  
H -4.145959 -1.954995 0.269830  
H -3.064223 -1.164534 1.058855  
O 3.511303 -0.480297 -0.081037  
H 3.095761 0.265275 0.402438  
H 4.465804 -0.392543 -0.023359

---  
47.6, 0.1; 54.6, 0.7; 60.1, 2.5; 63.8, 0.8; 70.0, 2.8; 83.6, 0.3; 88.9, 2.0; 109.0, 5.5; 115.7, 3.0; 123.6, 1.9; 132.8, 5.6; 151.0, 3.5; 164.0, 2.9; 164.3, 0.3; 169.7, 7.7; 179.1, 0.9; 196.1, 3.5; 212.3, 9.2; 232.1, 0.7; 240.7, 48.8; 249.1, 77.4; 255.7, 2.7; 276.7, 54.2; 298.7, 61.4; 303.1, 18.9; 307.6, 46.0; 315.2, 21.6; 321.3, 40.6; 342.8, 6.6; 349.2, 103.3; 357.1, 34.4; 374.0, 23.1; 405.2, 126.4; 411.1, 18.9; 432.3, 135.0; 447.5, 6.0; 455.5, 10.5; 470.6, 63.1; 502.1, 101.7; 523.0, 106.1; 537.0, 54.3; 548.8, 181.5; 586.2, 27.6; 608.3, 178.1; 625.2, 267.7; 641.0, 128.5; 737.7, 277.2; 750.8, 250.6; 791.6, 28.4; 811.9, 117.8; 839.0, 118.0; 856.0, 207.7; 865.8, 80.7; 970.7, 123.4; 1584.6, 130.9; 1587.4, 108.7; 1620.4, 128.9; 1626.0, 37.3; 1627.1, 71.9; 1636.0, 109.9; 1672.8, 55.7; 2461.5, 3.0; 3413.3, 411.8; 3461.8, 906.2; 3536.3, 445.9; 3560.1, 507.9; 3576.9, 135.9; 3615.3, 297.1; 3693.5, 661.3; 3834.7, 141.6; 3838.8, 61.7; 3875.7,

138.1; 3881.0, 146.2; 3908.4, 154.3; 3914.1, 167.5; 3941.8, 247.4; 3944.4, 119.1; 3969.7, 221.3;

-2178.616166950 -2178.402000 -2178.376065 -2178.455601

<sup>2</sup>N4

Co 0.450878 -0.124916 -0.014936  
O 0.013244 -2.242427 0.040937  
H 0.429815 -2.944436 -0.464362  
O 1.067162 1.938357 0.041456  
H 0.251463 2.479472 0.012163  
O -1.000859 0.119885 1.467126  
H -1.746074 -0.472931 1.252872  
H -0.955490 -2.339839 -0.067323  
H -1.361415 1.018344 1.348825  
H 1.555187 2.206794 0.826415  
O -1.579489 2.430041 0.016324  
H -2.249401 3.090099 -0.175318  
H -1.565410 1.757413 -0.704935  
O 1.719308 -0.414535 1.498612  
H 1.228333 -0.711889 2.275964  
H 2.437505 -1.040210 1.352181  
O -2.535939 -1.469696 -0.184257  
H -2.186164 -0.836149 -0.855135  
H -3.429120 -1.730783 -0.418344  
O -0.863274 0.245839 -1.306154  
H -0.535875 0.251624 -2.208110  
O 2.104074 -0.260298 -1.334848  
H 2.393162 0.638315 -1.537306  
H 2.165962 -0.770418 -2.147875

---  
23.4, 4.5; 82.0, 0.9; 93.1, 3.1; 105.5, 9.5; 120.1, 8.9; 139.7, 3.9; 154.2, 6.0; 160.2, 6.4; 185.8, 4.2; 194.8, 10.4; 198.4, 8.0; 209.6, 57.5; 225.4, 17.8; 251.8, 13.5; 266.1, 34.5; 277.2, 4.5; 289.6, 13.8; 294.1, 44.7; 306.3, 10.5; 311.6, 4.2; 321.8, 49.2; 349.3, 44.7; 364.5, 7.6; 375.1, 9.1; 388.5, 48.8; 391.7, 61.9; 418.4, 50.7; 464.5, 26.4; 468.4, 228.9; 514.8, 24.7; 520.7, 90.8; 532.6, 229.1; 544.8, 157.8; 564.4, 73.6; 576.8, 145.8; 591.8, 97.4; 681.5, 18.8; 718.7, 366.1; 759.9, 540.3; 854.8, 122.4; 869.8, 73.3; 883.7, 128.1; 898.6, 85.2; 972.4, 3.7; 1570.9, 19.3; 1593.6, 218.9; 1603.5, 51.3; 1607.1, 156.5; 1630.8, 117.5; 1644.5, 80.4; 1686.2, 38.9; 3417.2, 484.7; 3455.5, 272.3; 3579.0, 291.1; 3593.2, 300.6; 3652.2, 746.5; 3703.1, 674.8; 3809.1, 101.3; 3823.5, 73.3; 3907.2, 155.6; 3920.3, 161.1; 3933.1, 43.7; 3937.8, 143.6; 3943.4, 226.1; 3945.4, 124.9; 3950.3, 163.7;

-1993.357182070 -1993.161661 -1993.141456 -1993.206739

<sup>4</sup>N4

Co -0.431862 0.125508 -0.072310  
O -0.098324 2.214668 0.085009  
H -0.554473 2.931134 -0.362363  
O -1.001045 -1.945750 0.068131  
H -0.170679 -2.467341 0.040002  
O 1.028977 -0.122259 1.521503  
H 1.751765 0.504847 1.343712  
H 0.868930 2.363259 0.000467  
H 1.426197 -0.999927 1.380108  
H -1.473198 -2.201119 0.867066  
O 1.650815 -2.397012 0.000395  
H 2.318696 -3.060036 -0.187978  
H 1.654441 -1.718435 -0.716445  
O -1.791162 0.312299 1.570679  
H -1.334586 0.574774 2.378742  
H -2.619793 0.799331 1.527332  
O 2.478805 1.585848 -0.137227  
H 2.198174 0.924531 -0.814676  
H 3.353205 1.915760 -0.355090  
O 0.959833 -0.222699 -1.364440  
H 0.728071 -0.230763 -2.295109  
O -2.189678 0.224452 -1.380024  
H -2.469513 -0.673446 -1.593019  
H -2.322722 0.752341 -2.172580

---  
79.9, 0.4; 87.4, 1.9; 95.0, 6.8; 106.5, 2.4; 114.2, 1.4; 136.8, 4.1; 154.3, 1.0; 163.7, 0.5; 179.6, 2.9; 183.7, 1.7; 205.8, 4.9; 223.1, 45.7; 234.2, 33.0; 242.2, 1.0; 260.7, 35.3; 271.6, 14.7; 273.7, 18.9;



287.0, 36.1; 291.2, 8.7; 293.0, 10.7; 300.4, 41.5;  
 320.6, 32.8; 339.0, 15.8; 374.0, 87.8; 387.1, 38.3;  
 407.1, 164.0; 413.8, 64.4; 435.9, 168.6; 455.7, 150.7;  
 485.1, 69.3; 493.7, 105.6; 504.3, 11.6; 537.4, 108.6;  
 549.8, 51.2; 562.1, 160.1; 574.6, 96.1; 603.8, 63.8;  
 710.4, 430.8; 745.7, 478.3; 774.4, 83.9; 826.1, 228.1;  
 868.2, 67.4; 893.7, 114.4; 950.9, 15.3; 1580.0, 25.3;  
 1599.1, 238.8; 1600.1, 74.5; 1613.5, 112.3; 1630.0,  
 137.2; 1640.8, 71.2; 1680.3, 35.7; 3404.8, 514.9;  
 3442.9, 276.6; 3540.8, 471.9; 3570.5, 603.1; 3679.5,  
 387.9; 3740.5, 578.1; 3833.7, 95.5; 3838.4, 60.8;  
 3907.3, 156.3; 3939.0, 137.7; 3941.9, 59.4; 3945.4,  
 148.4; 3948.9, 210.8; 3949.8, 121.2; 3952.5, 193.5;

-1993.388877070 -1993.194373 -1993.173914 -  
 1993.239369

<sup>30</sup>1

|    |           |           |           |
|----|-----------|-----------|-----------|
| Co | 0.062659  | -0.155602 | 0.291327  |
| O  | -0.710718 | -1.773967 | -1.169479 |
| H  | -0.823986 | -1.268854 | -2.000938 |
| O  | -0.755152 | -1.180087 | 2.069449  |
| H  | -1.658744 | -1.448612 | 1.811519  |
| O  | 0.953726  | 1.161017  | -1.179049 |
| H  | 0.663899  | 2.049836  | -0.917009 |
| O  | 0.511754  | 1.327920  | 2.075887  |
| H  | -0.001195 | 0.752422  | 2.661507  |
| O  | -2.959256 | -1.597188 | 0.520616  |
| H  | -2.382310 | -1.898708 | -0.204328 |
| H  | -3.754409 | -2.136035 | 0.508233  |
| H  | 1.409031  | 1.334595  | 2.424189  |
| H  | 0.532814  | 1.002259  | -2.038401 |
| H  | -0.328761 | -1.960093 | 2.435803  |
| H  | -0.179689 | -2.547564 | -1.378133 |
| O  | -1.924318 | 0.844671  | -0.276378 |
| H  | -2.672545 | 0.413427  | 0.161576  |
| H  | -1.846340 | 1.771653  | 0.011661  |
| N  | 3.062917  | -0.788498 | -0.178301 |
| N  | 3.856755  | -0.608384 | -0.945693 |
| O  | 2.220888  | -0.982364 | 0.633201  |
| O  | -1.151035 | 0.295298  | -2.860226 |
| H  | -1.578350 | 0.472777  | -3.701966 |
| H  | -1.708427 | 0.662656  | -2.149257 |
| O  | -0.557523 | 3.138477  | 0.295925  |
| H  | -0.170806 | 2.818150  | 1.128836  |
| H  | -0.656617 | 4.091297  | 0.369255  |

20.5, 0.2; 45.2, 0.3; 47.0, 0.9; 66.7, 1.3; 76.2, 1.3;  
 83.4, 4.7; 88.2, 3.4; 100.1, 1.3; 105.0, 5.3; 117.2,  
 1.2; 122.6, 0.5; 139.5, 1.5; 150.4, 0.4; 157.5, 0.3;  
 167.1, 6.8; 183.3, 0.8; 195.5, 4.4; 198.0, 8.0; 218.1,  
 15.3; 236.7, 15.5; 240.3, 5.0; 252.9, 6.5; 269.5, 11.7;  
 280.7, 8.2; 285.4, 3.7; 310.3, 27.2; 331.6, 10.5;  
 355.1, 5.9; 367.4, 88.0; 379.5, 73.2; 386.8, 22.1;  
 397.0, 73.0; 406.8, 51.0; 417.3, 144.0; 430.6, 37.9;  
 442.0, 105.2; 460.6, 14.5; 473.0, 260.6; 510.6, 114.7;  
 534.3, 110.9; 546.4, 268.5; 589.9, 8.4; 611.4, 2.2;  
 635.5, 357.2; 645.3, 382.5; 678.0, 58.8; 722.3, 151.3;  
 739.3, 161.0; 766.5, 52.7; 815.1, 240.7; 844.5, 61.3;  
 885.1, 48.7; 1340.9, 90.5; 1540.9, 141.7; 1577.9, 91.1;  
 1586.4, 198.2; 1593.9, 15.7; 1626.0, 84.5; 1635.3,  
 49.4; 1639.3, 15.6; 1664.9, 61.5; 2411.0, 449.8;  
 3574.0, 359.0; 3619.0, 344.9; 3647.2, 411.7; 3681.1,  
 113.1; 3685.0, 354.4; 3700.0, 63.5; 3731.9, 498.0;  
 3784.9, 65.0; 3795.6, 394.1; 3820.8, 625.0; 3914.6,  
 96.4; 3921.8, 137.2; 3922.6, 232.8; 3939.9, 167.2;  
 3940.5, 184.8; 3942.0, 161.0;

-2178.593834650 -2178.375661 -2178.349758 -  
 2178.430175

<sup>3</sup>TS<sub>01-2</sub>

|    |           |           |           |
|----|-----------|-----------|-----------|
| Co | -0.300512 | 0.604679  | 0.339564  |
| O  | -1.282513 | 1.399781  | 2.148788  |
| H  | -0.770820 | 1.632105  | 2.928505  |
| O  | -1.734321 | 1.793168  | -0.781878 |
| H  | -2.341841 | 1.211966  | -1.269012 |
| O  | 1.222302  | 1.817086  | -0.413562 |
| H  | 2.155737  | 1.736259  | -0.154955 |
| O  | 1.183145  | -0.509294 | 1.458458  |
| H  | 1.056858  | -1.469633 | 1.473442  |
| H  | -1.851049 | 0.659984  | 2.397115  |
| H  | 2.116272  | -0.320046 | 1.269908  |

|   |           |           |           |
|---|-----------|-----------|-----------|
| H | -2.273051 | 2.353770  | -0.215445 |
| H | 1.079092  | 2.642454  | -0.882707 |
| O | 3.563248  | 0.566707  | 0.332049  |
| H | 3.706415  | 0.068829  | -0.485781 |
| H | 4.431069  | 0.781590  | 0.687285  |
| O | -2.789935 | -0.582643 | -1.823383 |
| H | -3.498630 | -0.850114 | -2.415290 |
| H | -1.957162 | -0.849852 | -2.236583 |
| O | -1.844276 | -0.920102 | 0.825163  |
| H | -2.416518 | -1.009161 | 0.045495  |
| H | -1.414928 | -1.780299 | 0.958368  |
| N | 1.135451  | -0.857771 | -1.906839 |
| N | 2.271583  | -0.784079 | -1.919047 |
| O | -0.007581 | -0.761197 | -1.496018 |
| O | -0.034012 | -3.091391 | 1.340296  |
| H | 0.170961  | -3.727952 | 0.648269  |
| H | -0.136250 | -3.610200 | 2.145063  |

-481.2,1417.2; 38.5, 3.0; 55.9, 1.4; 60.9, 1.0;  
 73.2, 4.5; 83.7, 6.3; 84.8, 1.1; 94.9, 5.9; 103.9,  
 2.9; 105.0, 5.7; 110.2, 2.0; 117.4, 10.0; 126.8, 2.9;  
 146.7, 6.5; 153.6, 9.9; 160.1, 40.2; 175.8, 0.4; 180.6,  
 0.6; 191.6, 6.2; 221.5, 10.7; 223.9, 3.1; 231.2, 9.6;  
 238.5, 6.5; 241.6, 5.9; 249.7, 30.2; 255.4, 13.2;  
 273.2, 115.8; 290.1, 8.3; 303.1, 47.1; 309.4, 15.9;  
 318.8, 88.3; 329.3, 101.5; 348.2, 44.0; 363.8, 53.9;  
 368.0, 94.7; 397.5, 206.9; 410.6, 18.2; 421.6, 65.1;  
 433.2, 63.0; 459.4, 94.5; 479.7, 136.8; 510.3, 40.7;  
 556.0, 134.2; 578.1, 150.5; 602.3, 154.4; 635.3, 361.3;  
 651.8, 179.6; 683.8, 231.9; 696.7, 87.3; 728.2, 219.3;  
 761.8, 92.6; 782.2, 52.7; 1117.3, 515.9; 1573.1, 338.3;  
 1586.4, 56.5; 1589.5, 182.7; 1595.7, 127.5; 1613.5,  
 35.5; 1623.7, 74.6; 1627.2, 54.5; 1656.0, 7.3; 2186.0,  
 801.0; 3688.1, 8.6; 3694.1, 125.9; 3708.2, 125.6;  
 3711.9, 237.8; 3764.7, 273.7; 3779.8, 243.0; 3800.0,  
 365.2; 3810.4, 631.1; 3816.7, 79.6; 3855.3, 2.0;  
 3918.3, 160.0; 3931.6, 205.7; 3942.6, 163.9; 3943.6,  
 222.3; 3949.0, 165.3; 3956.1, 133.8;

-2178.577898930 -2178.364078 -2178.337195 -  
 2178.418568

<sup>30</sup>2

|    |           |           |           |
|----|-----------|-----------|-----------|
| Co | 0.727843  | -0.306537 | 0.106074  |
| O  | 0.727807  | 0.823550  | 1.871304  |
| H  | -0.201106 | 1.052553  | 2.087968  |
| O  | -0.890351 | -1.397984 | 0.988585  |
| H  | -1.454239 | -0.857739 | 1.570377  |
| O  | 0.586776  | -1.608584 | -1.507770 |
| H  | 1.071750  | -1.354330 | -2.299594 |
| O  | 2.588281  | 0.412965  | -0.692302 |
| H  | 2.608690  | 1.360724  | -0.903639 |
| H  | 1.250440  | 1.628936  | 1.937646  |
| H  | 3.426221  | 0.165404  | -0.289357 |
| H  | -1.477875 | -1.808866 | 0.330171  |
| H  | -0.353966 | -1.739396 | -1.751658 |
| O  | -2.973339 | 0.680637  | -0.503322 |
| H  | -2.075170 | 1.007966  | -0.766950 |
| H  | -3.627154 | 1.250850  | -0.917521 |
| O  | 2.021293  | -1.748140 | 1.098006  |
| H  | 1.956544  | -2.632537 | 0.719826  |
| H  | 1.812016  | -1.842508 | 2.034377  |
| N  | 0.048187  | 2.320659  | -1.122474 |
| N  | 1.127067  | 2.740193  | -1.027740 |
| O  | -0.405401 | 1.072682  | -0.788315 |
| O  | -2.031280 | 0.825862  | 2.124048  |
| H  | -2.596082 | 1.057266  | 2.866467  |
| H  | -2.550151 | 0.964038  | 1.305342  |
| O  | -2.156601 | -1.810159 | -1.417945 |
| H  | -2.757111 | -2.434105 | -1.834823 |
| H  | -2.648820 | -0.974346 | -1.279431 |

32.2, 1.1; 55.5, 7.3; 80.5, 4.8; 86.5, 0.0; 92.3,  
 6.7; 109.0, 0.2; 111.3, 6.0; 117.8, 0.2; 133.1, 1.9;  
 143.9, 1.6; 148.2, 2.4; 150.2, 2.1; 159.0, 0.3; 181.2,  
 0.7; 192.8, 3.5; 207.2, 28.7; 219.2, 11.1; 225.7, 2.7;  
 233.2, 11.0; 242.4, 17.9; 260.6, 5.8; 271.9, 2.5;  
 289.5, 27.8; 294.7, 22.2; 320.7, 4.8; 330.1, 31.2;  
 335.5, 19.6; 345.9, 27.0; 352.6, 28.5; 369.7, 37.2;  
 378.9, 49.7; 389.1, 60.2; 418.2, 57.3; 425.3, 199.6;  
 465.7, 69.2; 478.8, 138.6; 483.8, 272.4; 510.9, 139.4;  
 534.9, 134.4; 555.2, 9.4; 571.1, 54.2; 588.7, 129.0;  
 612.2, 77.5; 614.8, 22.7; 639.8, 45.0; 698.1, 448.2;

728.1, 244.8; 748.2, 285.6; 782.2, 190.5; 812.8, 5.8;  
 848.5, 79.6; 873.6, 275.8; 965.0, 88.4; 1580.3, 164.7;  
 1601.0, 53.3; 1613.3, 56.4; 1616.1, 90.0; 1621.5,  
 120.0; 1635.9, 180.2; 1655.6, 21.3; 1688.8, 7.8;  
 1839.5, 137.1; 3335.6, 814.7; 3535.9, 75.3;  
 3563.8, 1139.3; 3584.0, 202.3; 3614.0, 582.0; 3672.9,  
 311.0; 3716.4, 139.4; 3729.2, 972.4; 3832.2, 85.7;  
 3904.4, 138.6; 3906.6, 176.9; 3919.6, 248.2; 3921.2,  
 80.3; 3929.1, 232.3; 3932.1, 91.3; 3935.7, 166.2;

-2178.595209530 -2178.378552 -2178.353632 -  
 2178.429878

<sup>5</sup>O2

Co 0.728201 -0.277047 0.104206  
 O 0.732501 0.904345 1.850906  
 H -0.198734 1.134943 2.055467  
 O -0.892977 -1.351062 1.032795  
 H -1.455812 -0.792628 1.597890  
 O 0.600731 -1.689031 -1.432319  
 H 1.100968 -1.500366 -2.232780  
 O 2.624131 0.350376 -0.699252  
 H 2.696249 1.286364 -0.941302  
 H 1.245845 1.718020 1.880488  
 H 3.449208 0.067909 -0.292182  
 H -1.482021 -1.780964 0.387966  
 O -0.338388 -1.820675 -1.680759  
 H -2.987146 0.659257 -0.527585  
 H -2.090862 0.980574 -0.805854  
 H -3.645091 1.210578 -0.960233  
 O 1.987912 -1.682783 1.175939  
 H 1.835913 -2.590183 0.887270  
 H 1.808560 -1.671467 2.123253  
 N 0.051829 2.269601 -1.241571  
 N 1.144411 2.641698 -1.097038  
 O -0.429507 1.035337 -0.829616  
 O -2.033969 0.909198 2.093039  
 H -2.600609 1.163815 2.826383  
 H -2.554267 1.013372 1.270254  
 O -2.152485 -1.860297 -1.358711  
 H -2.754768 -2.501161 -1.746256  
 H -2.644832 -1.019688 -1.254482

42.7, 1.7; 63.4, 4.5; 83.7, 6.2; 90.2, 0.5; 94.5,  
 3.9; 108.8, 0.3; 120.7, 0.2; 123.2, 4.2; 131.5, 0.7;  
 139.6, 2.7; 149.1, 3.0; 150.2, 2.4; 161.9, 1.9; 172.1,  
 3.1; 192.4, 5.1; 198.7, 23.4; 219.6, 14.5; 222.3, 3.4;  
 232.3, 9.6; 246.1, 18.3; 261.2, 5.6; 270.2, 4.4; 290.4,  
 22.8; 295.1, 18.0; 317.8, 5.5; 330.8, 23.3; 340.0,  
 35.7; 350.3, 24.6; 359.9, 26.4; 376.6, 28.6; 392.2,  
 35.1; 402.5, 71.1; 425.7, 26.4; 429.2, 279.1; 463.0,  
 103.6; 472.9, 84.4; 501.6, 172.4; 514.3, 219.4; 544.0,  
 134.8; 564.4, 123.3; 567.9, 63.2; 578.8, 56.5; 595.3,  
 16.3; 610.6, 71.9; 624.3, 47.3; 646.4, 210.9; 695.4,  
 475.3; 748.0, 313.4; 780.2, 148.3; 812.9, 7.4; 847.7,  
 90.7; 872.5, 301.1; 963.7, 87.6; 1579.1, 161.0; 1601.7,  
 35.9; 1613.1, 38.9; 1616.6, 132.1; 1623.4, 107.2;  
 1637.2, 199.2; 1657.3, 15.8; 1690.8, 7.1; 1809.1, 87.7;  
 3329.5, 826.4; 3539.4, 78.0; 3567.2, 1122.2; 3587.1,  
 195.5; 3615.5, 567.5; 3675.4, 307.2; 3732.5, 954.5;  
 3748.3, 120.9; 3830.5, 82.1; 3905.9, 72.5; 3906.8,  
 245.9; 3921.0, 255.8; 3922.3, 73.6; 3929.5, 227.6;  
 3932.5, 91.4; 3933.2, 169.5;

-2178.592269720 -2178.375631 -2178.350778 -  
 2178.426953

<sup>3</sup>TS<sub>02-3</sub>

Co 0.701043 -0.319565 0.095568  
 O 0.706195 0.650224 1.964422  
 H -0.222121 0.889518 2.174447  
 O -0.936877 -1.456684 0.884999  
 H -1.492016 -0.949745 1.503906  
 O 0.583632 -1.559984 -1.582079  
 H 1.080788 -1.257839 -2.349095  
 O 2.616335 0.405143 -0.602382  
 H 2.729762 1.343471 -0.808150  
 H 1.252399 1.424868 2.127431  
 H 3.431473 0.072628 -0.214245  
 H -1.530156 -1.791068 0.188810  
 H -0.357942 -1.635517 -1.846040  
 O -2.940608 0.784389 -0.477769  
 H -2.017840 1.089037 -0.701026

H -3.560818 1.408204 -0.864825  
 O 1.965245 -1.847222 0.996880  
 H 1.845771 -2.703003 0.568944  
 H 1.750432 -1.982532 1.926982  
 N 0.146804 2.491849 -1.011086  
 N 1.231869 2.816038 -0.927795  
 O -0.377621 1.074433 -0.732291  
 O -2.050616 0.708006 2.159880  
 H -2.630784 0.896754 2.902314  
 H -2.545355 0.913807 1.339165  
 O -2.175649 -1.657727 -1.557158  
 H -2.789479 -2.233821 -2.020654  
 H -2.643280 -0.816329 -1.372137

---

-578.2, 203.9; 38.4, 0.7; 65.8, 3.8; 85.7, 0.8;  
 87.5, 11.0; 89.1, 1.1; 106.8, 0.3; 112.8, 0.9; 118.1,  
 2.0; 126.5, 0.8; 136.1, 3.4; 144.7, 1.6; 149.9, 3.3;  
 160.3, 0.9; 163.6, 7.6; 191.1, 2.8; 194.2, 16.2; 202.4,  
 12.1; 220.9, 7.6; 232.9, 5.8; 245.4, 14.3; 256.8, 3.3;  
 272.4, 2.0; 289.3, 42.5; 295.7, 19.2; 314.8, 14.3;  
 322.9, 16.9; 339.1, 6.4; 342.6, 48.2; 348.8, 44.5;  
 363.0, 58.0; 377.3, 63.0; 397.3, 24.7; 415.9, 254.6;  
 425.6, 75.1; 442.7, 71.3; 467.9, 28.3; 492.6, 274.1;  
 511.7, 96.7; 538.7, 115.2; 553.0, 109.9; 557.9, 37.0;  
 568.1, 29.1; 583.4, 79.5; 608.8, 14.1; 621.9, 111.3;  
 702.3, 410.1; 758.7, 333.5; 781.5, 165.2; 820.1, 8.8;  
 848.6, 87.4; 872.9, 305.8; 989.1, 94.3; 1583.7, 167.3;  
 1601.7, 22.5; 1614.5, 48.9; 1617.2, 108.4; 1622.5,  
 126.4; 1637.5, 220.0; 1657.5, 7.4; 1691.7, 6.2; 1971.9,  
 117.1; 3235.2, 1007.0; 3522.5, 118.3; 3552.8, 1094.9;  
 3575.3, 275.7; 3599.9, 472.6; 3668.6, 345.5; 3725.7,  
 948.8; 3781.1, 78.3; 3830.5, 84.0; 3904.7, 156.9;  
 3916.0, 150.5; 3924.1, 136.9; 3930.1, 194.6; 3930.7,  
 219.1; 3933.6, 169.6; 3933.8, 85.1;

-2178.593117410 -2178.378249 -2178.353277 -  
 2178.429537

<sup>5</sup>TS<sub>02-3</sub>

Co 0.714443 -0.272136 0.094127  
 O 0.710549 0.706962 1.969240  
 H -0.220636 0.942609 2.167836  
 O -0.925924 -1.425283 0.909232  
 H -1.488440 -0.914605 1.517838  
 O 0.611642 -1.578864 -1.549579  
 H 1.123843 -1.338502 -2.328074  
 O 2.654964 0.379865 0.575753  
 H 2.790982 1.315908 -0.779423  
 H 1.247907 1.489513 2.124622  
 H 3.452409 0.027607 -0.168166  
 H -1.513052 -1.781126 0.218938  
 H -0.326753 -1.667070 -1.819116  
 O -2.980416 0.742380 -0.489701  
 H -2.073137 1.073572 -0.722017  
 H -3.622561 1.340818 -0.881254  
 O 1.934238 -1.805187 1.048294  
 H 1.775206 -2.666761 0.645388  
 H 1.700752 -1.900923 1.978901  
 N 0.131507 2.390052 -1.161694  
 N 1.223855 2.695756 -0.999977  
 O -0.421210 1.080798 -0.715540  
 O -2.060222 0.746139 2.156742  
 H -2.638574 0.937243 2.900057  
 H -2.564801 0.929957 1.338069  
 O -2.152084 -1.705171 -1.534757  
 H -2.756079 -2.303452 -1.982836  
 H -2.636837 -0.870879 -1.365909

---

-521.5, 200.0; 41.2, 0.6; 61.5, 5.2; 83.4, 2.3;  
 83.7, 0.9; 88.0, 9.5; 99.3, 0.7; 108.0, 0.1; 119.7,  
 1.2; 125.0, 1.5; 140.3, 3.9; 147.4, 2.1; 154.1, 5.5;  
 158.2, 2.7; 161.4, 3.2; 189.8, 4.6; 194.7, 22.1; 209.0,  
 11.2; 214.4, 3.7; 226.7, 7.6; 242.6, 14.8; 255.5, 8.5;  
 270.1, 3.5; 287.0, 24.4; 293.2, 16.7; 313.8, 19.5;  
 321.7, 17.8; 326.3, 14.0; 338.3, 9.5; 343.6, 58.0;  
 357.6, 53.9; 373.6, 97.9; 410.7, 16.9; 416.4, 56.7;  
 424.9, 280.3; 444.1, 39.2; 467.7, 31.4; 496.8, 48.4;  
 510.8, 314.0; 531.4, 110.3; 546.6, 115.0; 559.3, 88.7;  
 571.7, 31.7; 579.6, 59.7; 596.3, 15.3; 611.5, 113.6;  
 691.3, 419.7; 746.0, 265.8; 775.3, 209.7; 810.3, 4.7;  
 837.3, 90.8; 862.3, 315.0; 960.4, 93.9; 1576.9, 169.8;  
 1604.2, 20.6; 1612.5, 33.0; 1617.6, 121.0; 1622.0,  
 130.3; 1638.1, 217.6; 1660.1, 11.9; 1689.6, 9.7;

1897.6, 82.5; 3301.1, 878.2; 3537.9, 80.0;  
3563.8,1075.2; 3586.6, 215.7; 3613.8, 563.0; 3673.7,  
308.5; 3730.4, 953.1; 3778.1, 74.7; 3829.8, 81.1;  
3909.0, 153.5; 3913.8, 160.0; 3923.5, 155.0; 3927.3,  
175.7; 3930.7, 217.7; 3932.3, 174.2; 3933.7, 88.1;

-2178.591665160 -2178.377098 -2178.352008 -  
2178.429046

<sup>3</sup>O3

Co -0.931730 -0.390126 -0.069721  
O 0.305638 -1.845492 -0.773969  
H 1.193951 -1.685340 -0.385554  
O -0.319925 -0.905844 1.936933  
H 0.642407 -1.060950 1.871474  
O -2.354000 0.905103 0.566607  
H -2.427041 1.586351 -0.133384  
O -1.653452 -0.258602 -2.114153  
H -1.720507 0.687470 -2.349830  
H 0.389382 -1.734905 -1.729515  
H -2.485571 -0.683126 -2.346058  
H -0.391157 -0.091648 2.467123  
H -1.997479 1.388849 1.340983  
O -1.509093 2.382504 -1.591086  
H -1.437728 3.255231 -1.985743  
H -0.648463 2.137509 -1.181358  
O -2.328814 -1.857461 0.115156  
H -3.032537 -1.647573 0.741240  
H -1.960414 -2.715007 0.361235  
O 0.224906 0.843584 -0.222610  
O 2.178782 -0.721409 0.753650  
H 3.132486 -0.643439 0.823882  
H 1.811942 0.092368 0.342017  
O -0.448213 1.843857 2.233747  
H -0.153015 2.600279 2.746880  
H 0.045854 1.811176 1.387453  
N 6.282944 0.459536 -0.757244  
N 5.349622 0.132780 -0.288836

19.3, 0.0; 21.3, 0.0; 72.3, 4.1; 82.9, 0.9; 87.4,  
1.0; 94.2, 1.6; 102.4, 0.9; 116.6, 7.1; 127.5, 0.1;  
138.9, 7.2; 152.8, 2.7; 162.8, 1.6; 176.2, 7.8; 185.9,  
0.4; 198.1, 1.6; 206.2, 11.3; 213.8, 4.3; 214.5, 4.9;  
240.3, 5.3; 245.3, 18.6; 273.2, 22.4; 281.3, 7.0;  
294.6, 4.3; 307.0, 34.2; 319.2, 44.9; 335.7, 4.7;  
348.4, 19.4; 366.7, 12.2; 379.2, 7.2; 380.8, 31.1;  
395.8, 50.7; 416.7, 107.0; 437.9, 124.1; 444.8, 57.8;  
463.4, 125.4; 510.6, 190.5; 516.5, 211.5; 529.8, 154.8;  
542.0, 32.9; 565.3, 122.1; 595.0, 14.1; 663.0, 69.1;  
665.3, 129.3; 700.2, 308.2; 731.7, 218.0; 746.1, 117.6;  
760.8, 588.6; 804.7, 31.9; 812.9, 40.9; 885.2, 107.7;  
936.5, 5.0; 975.9, 139.8; 1013.4, 100.4; 1550.0, 29.2;  
1562.2, 33.7; 1584.7, 410.5; 1605.9, 99.9; 1621.1,  
122.2; 1630.3, 55.4; 1672.0, 27.4; 1699.0, 52.0;  
2463.8, 4.2; 3428.1, 160.4; 3480.4, 351.1; 3513.1,  
541.7; 3524.5, 84.2; 3581.0, 317.3; 3617.1, 274.5;  
3657.3,1008.8; 3662.3, 456.3; 3729.3, 590.3; 3813.3,  
126.9; 3854.6, 602.9; 3866.6, 145.0; 3914.7, 179.0;  
3919.6, 181.8; 3938.5, 164.4; 3941.7, 201.1;

-2178.631521620 -2178.414027 -2178.389525 -  
2178.466984

<sup>5</sup>O3

Co 0.085794 -0.635632 0.026948  
O -0.015209 -0.717767 2.189157  
H -0.588154 0.041966 2.420784  
O -2.040682 -0.666750 0.164572  
H -2.339187 -0.112818 0.909856  
O -0.257253 -1.115020 -2.034955  
H 0.544823 -1.081043 -2.565927  
O 2.104459 -1.340408 -0.208961  
H 2.812473 -0.685103 -0.132458  
H 0.808308 -0.597785 2.670927  
H 2.419124 -2.193519 0.103333  
H -2.426480 -0.268089 -0.638333  
H -0.856317 -0.417001 -2.367389  
O -1.459834 2.692460 -0.201853  
H -0.559094 2.271825 -0.208329  
H -1.343967 3.641243 -0.301660  
O -0.156348 -2.805481 0.275910  
H -0.641733 -3.183684 -0.466308  
H -0.672313 -2.998069 1.067124

N 4.022937 2.214209 -0.126615  
N 3.747281 1.156476 -0.097357  
O 0.485456 0.993870 -0.122384  
O -1.980361 1.245198 2.129333  
H -2.554643 1.599476 2.813441  
H -1.849467 1.950510 1.461071  
O -2.243927 0.827250 -2.128476  
H -2.904765 1.043074 -2.791863  
H -2.046962 1.649475 -1.632816

15.2, 0.0; 39.0, 0.6; 63.1, 2.7; 67.2, 2.0; 80.5,  
1.3; 89.2, 0.6; 95.7, 1.2; 111.8, 10.3; 116.1, 0.6;  
134.3, 1.4; 136.3, 1.5; 150.5, 1.1; 160.1, 0.3; 165.0,  
6.2; 177.1, 4.9; 183.7, 13.4; 192.4, 11.9; 198.7, 18.3;  
204.8, 14.8; 214.3, 2.2; 227.8, 1.5; 241.0, 1.5; 256.3,  
5.9; 279.3, 13.2; 295.6, 7.0; 304.1, 25.8; 310.2, 41.2;  
324.9, 32.2; 334.6, 16.8; 345.9, 34.8; 351.4, 47.8;  
368.8, 62.7; 381.8, 87.1; 411.2, 211.9; 418.3, 78.5;  
451.9, 46.9; 459.0, 73.2; 503.5, 266.4; 520.2, 188.1;  
532.1, 150.1; 563.5, 29.3; 573.8, 22.4; 588.0, 38.5;  
604.2, 135.6; 606.6, 44.9; 707.4, 326.5; 747.1, 184.8;  
787.4, 329.7; 811.1, 44.6; 821.4, 22.3; 860.3, 54.9;  
879.7, 256.7; 945.5, 95.8; 1576.8, 81.0; 1580.2, 72.2;  
605.1, 58.9; 1613.8, 122.3; 1622.4, 143.9; 1635.2,  
213.1; 1654.5, 18.2; 1696.0, 2.7; 2466.9, 3.5; 3283.3,  
751.7; 3535.3, 177.8; 3580.5, 846.0; 3594.5, 430.7;  
3604.0, 41.7; 3655.9, 526.6; 3700.7, 978.6; 3779.3,  
306.9; 3829.5, 76.8; 3910.6, 168.0; 3921.0, 175.5;  
3925.5, 140.3; 3931.2, 214.0; 3934.2, 89.6; 3935.0,  
160.4; 3939.7, 250.6;

-2178.664117170 -2178.447872 -2178.421841 -  
2178.502849

<sup>3</sup>O4

Co -0.052121 -0.400327 0.172323  
O 1.130421 -1.767403 -0.729853  
H 1.889593 -1.304530 -1.151634  
O 1.677800 0.348842 1.215886  
H 2.399841 0.336596 0.561188  
O -1.331816 0.771075 1.199247  
H -2.080807 0.948798 0.593728  
O -1.697289 -1.510385 -0.711544  
H -2.321703 -0.865982 -1.097731  
H 0.627975 -2.195121 -1.434485  
H -2.201612 -2.124253 -0.168507  
H 1.526098 1.296554 1.381745  
H -0.905141 1.645340 1.322324  
O -2.595323 0.985569 -1.230695  
H -3.176305 1.509656 -1.787534  
H -1.660589 1.151157 -1.487986  
O -0.220307 -1.741689 1.688866  
H -0.493760 -1.359929 2.531814  
H 0.580472 -2.257855 1.844056  
O 0.082315 0.733403 -1.087093  
O 2.688224 0.255525 -1.398774  
H 3.340332 0.562976 -2.032810  
H 1.806622 0.645750 -1.607154  
O 0.417736 2.764891 0.727662  
H 0.522241 3.717529 0.662590  
H 0.339929 2.383495 -0.171933

83.6, 3.4; 93.6, 0.2; 114.8, 6.6; 123.7, 0.4; 135.6,  
9.3; 151.7, 3.4; 158.9, 2.5; 173.7, 7.9; 179.2, 0.8;  
196.0, 1.5; 202.2, 9.5; 210.2, 3.9; 214.4, 4.8; 238.1,  
1.7; 244.5, 14.7; 269.7, 11.3; 277.9, 10.9; 292.2, 8.7;  
302.2, 11.1; 313.1, 73.4; 330.9, 2.7; 349.0, 19.4;  
363.3, 15.4; 370.6, 23.9; 378.7, 13.3; 387.6, 76.5;  
410.7, 98.8; 415.6, 25.3; 436.3, 108.2; 443.1, 79.5;  
467.4, 203.7; 504.4, 191.6; 509.2, 192.3; 527.2, 69.4;  
532.5, 137.2; 586.7, 22.3; 662.5, 78.9; 665.1, 122.2;  
698.4, 339.5; 728.7, 199.0; 747.2, 91.2; 759.9, 598.9;  
801.3, 29.9; 810.0, 40.4; 878.4, 117.2; 939.0, 1.5;  
970.0, 138.9; 996.1, 96.6; 1550.7, 24.8; 1557.6, 29.2;  
1583.1, 437.9; 1606.1, 92.1; 1619.0, 122.3; 1630.8,  
64.7; 1671.3, 28.4; 1698.3, 52.2; 3420.3, 139.6;  
3485.6, 274.1; 3513.2, 663.1; 3529.0, 29.2; 3580.0,  
144.1; 3608.0, 482.2; 3649.6, 863.0; 3672.7, 454.8;  
3729.6, 575.4; 3813.3, 124.2; 3863.5, 185.3; 3912.5,  
182.6; 3919.6, 183.8; 3937.4, 137.1; 3939.2, 227.9;  
3941.8, 184.5;

-2069.138439850 -2068.926394 -2068.905705 -  
2068.971009

°04

|    |           |           |           |
|----|-----------|-----------|-----------|
| Co | 0.007785  | -0.350616 | 0.074820  |
| O  | 1.490743  | -1.729438 | -0.545709 |
| H  | 2.200054  | -1.209201 | -0.973808 |
| O  | 1.539886  | 0.585963  | 1.244012  |
| H  | 2.311123  | 0.655497  | 0.654376  |
| O  | -1.538632 | 0.593356  | 1.235562  |
| H  | -2.293086 | 0.660820  | 0.623282  |
| O  | -1.427525 | -1.723809 | -0.708508 |
| H  | -2.150723 | -1.205132 | -1.111046 |
| H  | 1.172519  | -2.372216 | -1.188839 |
| H  | -1.814672 | -2.348122 | -0.085996 |
| H  | 1.253573  | 1.506832  | 1.384540  |
| H  | -1.246337 | 1.514940  | 1.366612  |
| O  | -2.725490 | 0.574668  | -1.339789 |
| H  | -3.409815 | 0.940039  | -1.906847 |
| H  | -1.860861 | 0.908755  | -1.648606 |
| O  | -0.109562 | -1.738063 | 1.759867  |
| H  | -0.497845 | -1.342561 | 2.548710  |
| H  | 0.740784  | -2.112042 | 2.017393  |
| O  | 0.010819  | 0.799446  | -1.177382 |
| O  | 2.763868  | 0.532922  | -1.295564 |
| H  | 3.470226  | 0.878862  | -1.847523 |
| H  | 1.913505  | 0.878334  | -1.629026 |
| O  | -0.003902 | 2.829963  | 0.732174  |
| H  | -0.006889 | 3.790975  | 0.732154  |
| H  | 0.006610  | 2.520802  | -0.192803 |

---

76.6, 1.8; 85.2, 0.1; 98.3, 3.1; 104.7, 1.1; 123.8,  
4.7; 135.1, 0.7; 152.4, 5.2; 158.6, 5.3; 171.0, 0.5;  
182.2, 5.2; 183.6, 0.4; 189.3, 1.5; 199.9, 5.1; 226.9,  
23.0; 241.4, 17.4; 246.2, 9.6; 251.5, 57.6; 267.2, 2.3;  
272.6, 5.3; 277.1, 5.2; 282.1, 29.3; 325.3, 44.2;  
332.9, 55.2; 354.0, 7.0; 357.7, 0.4; 368.3, 47.6;  
374.3, 13.7; 394.7, 47.2; 404.9, 107.1; 410.1, 13.9;  
430.8, 238.5; 457.7, 155.3; 465.6, 106.7; 489.2, 226.4;  
508.5, 116.1; 563.4, 15.9; 572.2, 103.3; 592.1, 83.8;  
632.1, 177.6; 657.1, 393.7; 695.6, 589.2; 752.2, 48.7;  
791.0, 31.4; 792.2, 122.6; 821.3, 58.4; 841.0, 37.4;  
860.6, 265.7; 861.1, 56.4; 1564.9, 21.6; 1571.4, 21.9;  
1588.3, 457.5; 1602.0, 84.6; 1616.5, 118.0; 1625.7,  
81.8; 1665.1, 30.8; 1689.8, 44.6; 3591.5, 102.9;  
3602.1, 95.3; 3633.0, 117.1; 3640.2, 427.6; 3642.5,  
55.2; 3653.8, 93.2; 3695.8, 519.7; 3732.2, 730.3;  
3751.0, 533.6; 3828.7, 93.6; 3896.8, 194.9; 3904.4,  
182.7; 3933.6, 156.6; 3934.5, 248.4; 3936.5, 170.3;  
3937.0, 170.0;

-2069.168103240 -2068.957898 -2068.935990 -  
2069.004576
